# Supplementary material for: A donor–acceptor complex enables the synthesis of E-olefins from alcohols, amines and carboxylic acids
Source: Royal Society of Chemistry journal article supplement (doi:10.1039/d1sc01024g), 2021-01-01
Supplement: d1sc01024g1.pdf [file d1sc01024g1.pdf]

## Electronic Supplementary Information

### **Donor-Acceptor Complex Enables Synthesis of *E*-Olefins from Alcohols, Amines and Carboxylic Acids**

Kun-Quan Chen<sup>a</sup>, Jie Shen<sup>a</sup>, Zhi-Xiang Wang<sup>a\*</sup>, and Xiang-Yu Chen<sup>a\*</sup>

School of Chemical Sciences, University of Chinese Academy of Sciences, Beijing 100049 (China)

### **Table of Contents**

|                                                                                |     |
|--------------------------------------------------------------------------------|-----|
| <b>1. General information</b> .....                                            | S2  |
| <b>2. Photoinduced defunctionalizations for the synthesis of olefins</b> ..... | S3  |
| <b>3. Mechanistic studies</b> .....                                            | S7  |
| <b>4. Compound characterization data</b> .....                                 | S12 |
| <b>5. NMR spectra</b> .....                                                    | S30 |
| <b>6. References</b> .....                                                     | S89 |

## 1. General information

- Chemicals were purchased from Alfa or Bidepharmand used without further purification unless otherwise noted. Solvents were purified from purification systems made by Vigor. N-hydroxyphthalimide esters, oxyisoindoline-1,3-dione compounds, 4-nitrobenzoate compounds and pyridinium salts were prepared according to literature methods.<sup>1-3</sup>
- Chromatographic purification of the products was performed on silica gel (200-300 mesh, flash).
- IR spectra were taken on a Vertex 70 spectrophotometer and reported as wave numbers ( $\text{cm}^{-1}$ ).
- UV-vis absorption spectra were acquired on UV-2550 spectrophotometer (Shimadzu, Japan).
- The GC-MS TQ8040 was used in the detection of the reaction mixture.
- $^1\text{H}$ - and  $^{13}\text{C}$ - NMR spectra were recorded at ambient temperature on a Shimadzu Avance 400/500 Spectrometer. The chemical shifts are reported in ppm downfield of tetramethylsilane (TMS) and referenced to residual solvent peaks resonance as internal standard. The order of citation in parentheses is a) multiplicity (s = singlet, d = doublet, t = triplet, q = quartet, dd= doublet of doublet, ddd= doublet of doublet of doublet, td = triplet of doublet, m = multiplet), b) coupling constants, c) number of protons. Coupling constants ( $J$ ) are reported in Hertz (Hz).
- Photochemical experiments were performed magnetically stirred in 10 mL glass Schlenk tubes, sealed with a rubber septum. The tubes were irradiated with blue light (460 nm,) using a LED lamp with a power output of 50 W. The distance from the light source to the irradiation vessel is 1 cm to keep the reaction temperature at 45 °C (The purchase link for LED lamp is <https://item.m.jd.com/product/47264027233.html>).

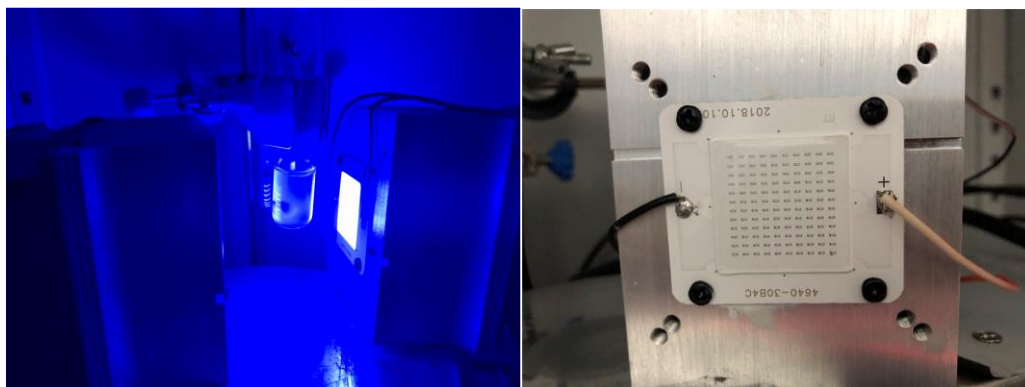

- The mass analysis mode of the HRMS was orbitrap.

## 2. Photoinduced defunctionalizations for the synthesis of olefins

Table S1. Optimization of the reaction conditions of decarboxylation.

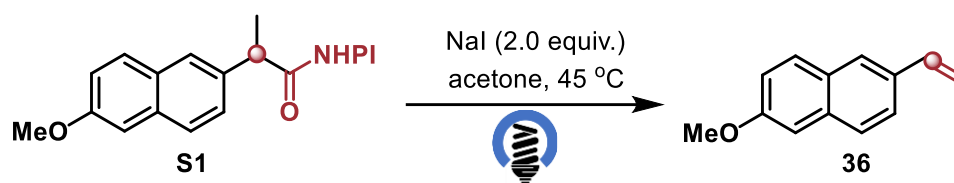

| Entry | Conditions                                   | Yield (%) <sup>a</sup> |
|-------|----------------------------------------------|------------------------|
| 1     | --                                           | 98                     |
| 2     | NaI (0.2 equiv.)                             | 17                     |
| 3     | THF as the solvent                           | 98                     |
| 4     | DCM as the solvent                           | 60                     |
| 5     | DMSO as the solvent                          | trace                  |
| 6     | DME as the solvent                           | 39                     |
| 7     | MeCN as the solvent                          | 95                     |
| 8     | without NaI                                  | NR                     |
| 9     | without light                                | NR                     |
| 10    | IPr.HCl (0.2 equiv)<br>collidine (0.2 equiv) | 90                     |

<sup>a</sup>Yield of isolated product

**General procedure A:** To a dry Schlenk tube equipped with a stirring bar, the NHPI ester (0.2 mmol), NaI (0.4 mmol, 60.0 mg, 2.0 equiv.) were added. The tube was evacuated and filled with argon (three times). After the addition of acetone (2.0 mL) to the mixture via gastight syringe. The mixture was stirred overnight at 45 °C under a 50W blue LED (460 nm) lamp spaced 1 cm apart. Then the reaction mixture was subjected to silica gel chromatography to afford the desired product (PE:EA = 200:1 – 5:1).

**Table S2. Optimization of the reaction conditions of deaminations.**

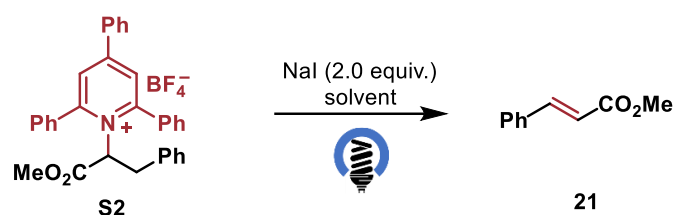

| Entry          | Solvent | Yield (%) <sup>a</sup> | E/Z  |
|----------------|---------|------------------------|------|
| 1              | acetone | trace                  | --   |
| 2              | DCM     | trace                  | --   |
| 3              | DMF     | 17                     | 98/2 |
| 4              | DMA     | 29                     | 98/2 |
| 5              | THF     | NR                     | --   |
| 6              | MeCN    | NR                     | --   |
| 7              | DMSO    | 78                     | 98/2 |
| 8 <sup>b</sup> | DMSO    | 63                     | 98/2 |
| 9 <sup>c</sup> | DMSO    | NR                     | --   |

<sup>a</sup>Yield of isolated product. <sup>b</sup>0.2 equivalent of NaI was used in the reaction. <sup>c</sup>without light.

**General procedure B:** To a dry Schlenk tube equipped with a stirring bar, the katritzky salt (0.1 mmol), NaI (0.2 mmol, 30.0 mg, 2.0 equiv.) were added. The tube was evacuated and filled with argon (three times). After the addition of DMSO (1.0 mL) to the mixture via gastight syringe. The mixture was stirred overnight at 45 °C under a 50W blue LED (460 nm) lamp spaced 2 cm apart. Then the reaction mixture was subjected to silica gel chromatography to afford the desired product (PE:EA = 200:1 – 2:1 and one drop of NEt<sub>3</sub>).

**Table S3. Optimization of the reaction conditions of dehydrations.**

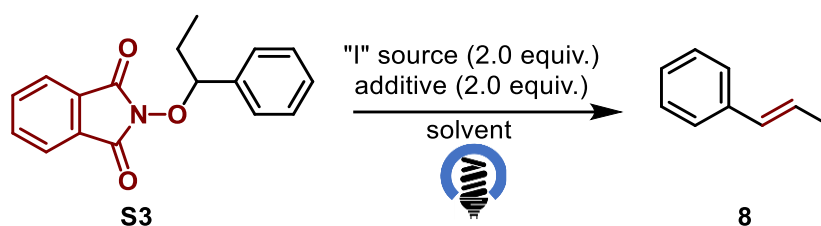

| Entry           | Additive                                        | "I" source                   | Solvent                              | Yield (%) <sup>a</sup> | E/Z    |
|-----------------|-------------------------------------------------|------------------------------|--------------------------------------|------------------------|--------|
| 1               | PPh <sub>3</sub>                                | NaI                          | acetone                              | 47                     | 98/2   |
| 2               | PPh <sub>3</sub>                                | NaI (0.2 equiv.)             | acetone                              | trace                  | --     |
| 3 <sup>b</sup>  | PPh <sub>3</sub>                                | NaI                          | acetone                              | NR                     | --     |
| 4               | no                                              | NaI                          | acetone                              | NR                     | --     |
| 5               | PPh <sub>3</sub>                                | no                           | acetone                              | NR                     | --     |
| 6               | P(OPh) <sub>3</sub>                             | NaI                          | acetone                              | NR                     | --     |
| 7               | TsCl                                            | NaI                          | acetone                              | NR                     | --     |
| 8               | PhI(OAc) <sub>2</sub>                           | NaI                          | acetone                              | 57                     | 98/2   |
| 9               | PhI(OTf) <sub>2</sub>                           | NaI                          | acetone                              | trace                  | --     |
| 10              | Ph <sub>2</sub> I <sup>+</sup> OTf <sup>-</sup> | NaI                          | acetone                              | trace                  | --     |
| 11              | SbPh <sub>3</sub>                               | NaI                          | acetone                              | trace                  | --     |
| 12              | BiPh <sub>3</sub>                               | NaI                          | acetone                              | trace                  | --     |
| 13              | NaBF <sub>4</sub>                               | NaI                          | acetone                              | trace                  | --     |
| 14              | KBF <sub>4</sub>                                | NaI                          | acetone                              | trace                  | --     |
| 15              | LiBF <sub>4</sub>                               | NaI                          | acetone                              | 67                     | 98/2   |
| 16 <sup>c</sup> | LiBF <sub>4</sub>                               | NaI                          | acetone                              | 21                     | 98/2-- |
| 17 <sup>d</sup> | LiBF <sub>4</sub>                               | NaI                          | acetone                              | 15                     | 98/2   |
| 18              | LiBF <sub>4</sub>                               | NaI                          | DCM                                  | 17                     | 98/2   |
| 19              | LiBF <sub>4</sub>                               | NaI                          | THF                                  | 37                     | 98/2   |
| 20              | LiBF <sub>4</sub>                               | NaI                          | MeCN                                 | 25                     | 98/2   |
| 21              | LiBF <sub>4</sub>                               | NaI                          | Et <sub>2</sub> O, DMF, toluene, DME | trace                  | --     |
| 22              | LiPF <sub>6</sub>                               | NaI                          | acetone                              | 55                     | 98/2   |
| 23              | LiBF <sub>4</sub>                               | LiI                          | acetone                              | 19                     | 98/2   |
| 24              | LiBF <sub>4</sub>                               | CsI, CuI, Me <sub>4</sub> NI | acetone                              | trace                  | --     |
| 25 <sup>e</sup> | LiBF <sub>4</sub>                               | NaI                          | acetone                              | 29                     | 98/2   |

<sup>a</sup>Yield of isolated product. <sup>b</sup>without light. <sup>c</sup>0.2 equivalent of LiBF<sub>4</sub> was used. <sup>d</sup>0.2 equivalent of NaI was used. <sup>e</sup> 5.0 equivalent of TEMPO was added to the reaction.

**General procedure C:** To a dry Schlenk tube equipped with a stirring bar, the NHPI ether or 4-nitrobenzoate (0.2 mmol), NaI (0.4 mmol, 60.0 mg, 2.0 equiv.) and LiBF<sub>4</sub> (0.4 mmol, 37.6 mg, 2.0 equiv.) were added. The tube was evacuated and filled with argon (three times). After the addition of acetone (2.0 mL) to the mixture via gastight syringe. The mixture was stirred overnight at 45 °C under a 50W blue LED (460 nm) lamp spaced 1 cm apart. Then the reaction mixture was subjected to silica gel chromatography to afford the desired product (PE:EA = 200:1 – 5:1).

**The reaction of aliphatic substrates.<sup>a</sup>**

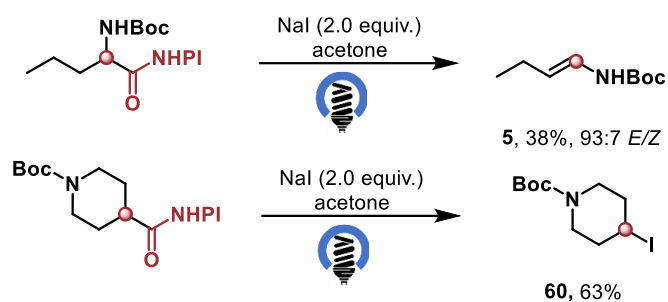

<sup>a</sup>Yield of isolated product.

### 3. Mechanistic studies

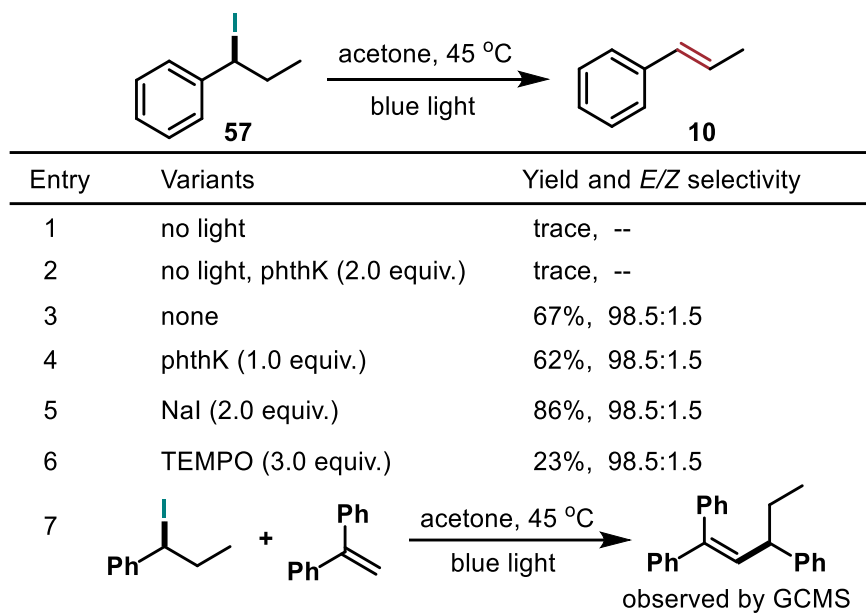

The control reactions were carried out following the general procedure A, using (1-iodopropyl)benzene **57** as the substrate.

### UV-vis absorption spectra of the reactions:

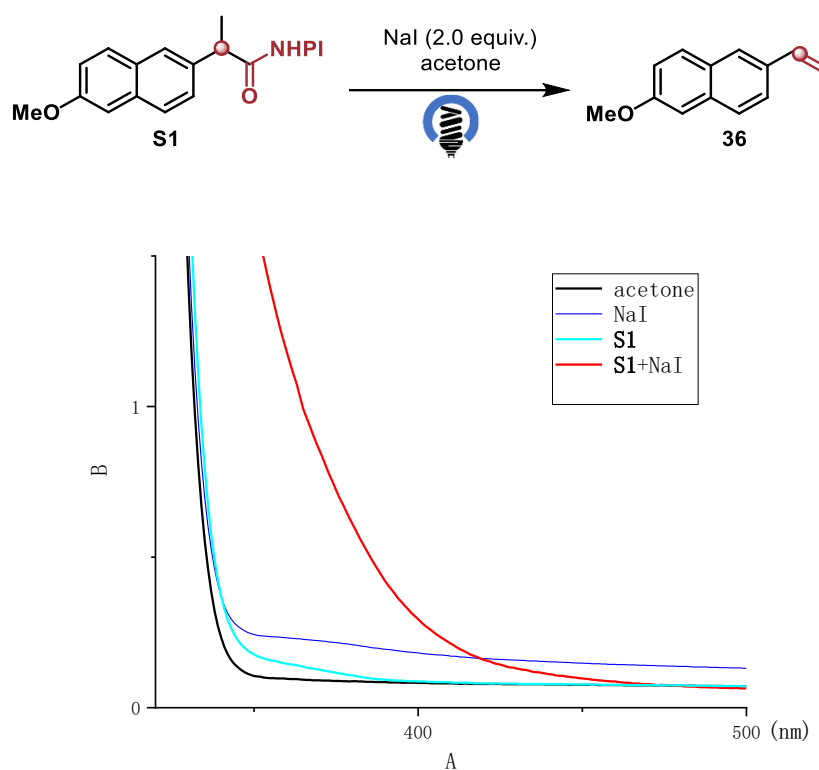

**Figure S1. UV-vis absorption spectra of the reaction of **S1****

UV-vis absorption spectra of N-hydroxyphthalimide ester **S1** (0.5 M in acetone), NaI (0.5 M in acetone) and the mixture of **S1** and NaI (0.5 M in acetone). An obvious red-shift of absorption was observed in the spectrum of the reaction mixture **S1** and NaI.



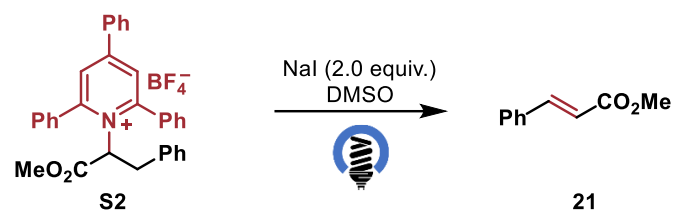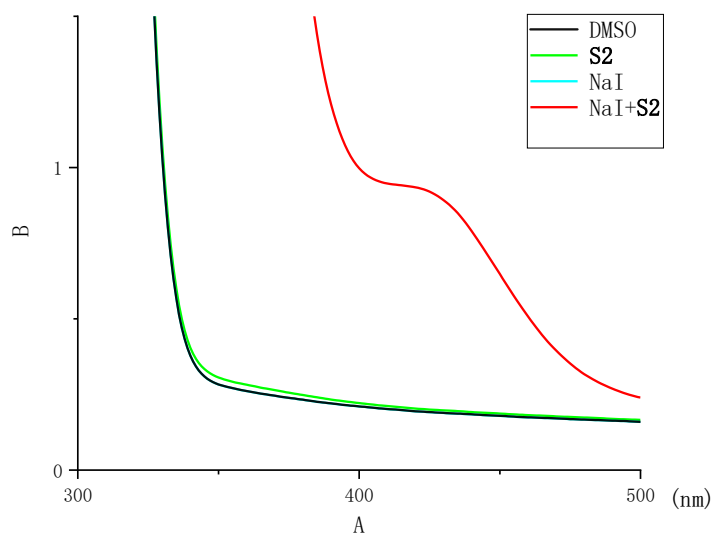

**Figure S2. UV-vis absorption spectra of the reaction of S2**

UV-vis absorption spectra of katritzky salt **S2** (0.5 M in DMSO), NaI (0.5 M in DMSO) and the mixture of **S2** and NaI (0.5 M in DMSO). An obvious red-shift of absorption was observed in the spectrum of the reaction mixture **S2** and NaI.

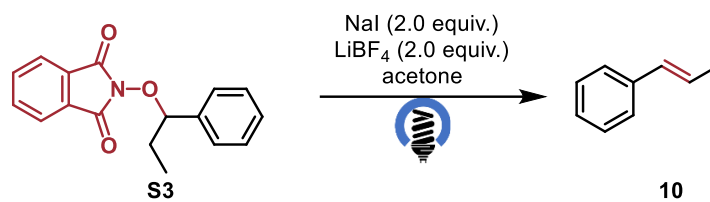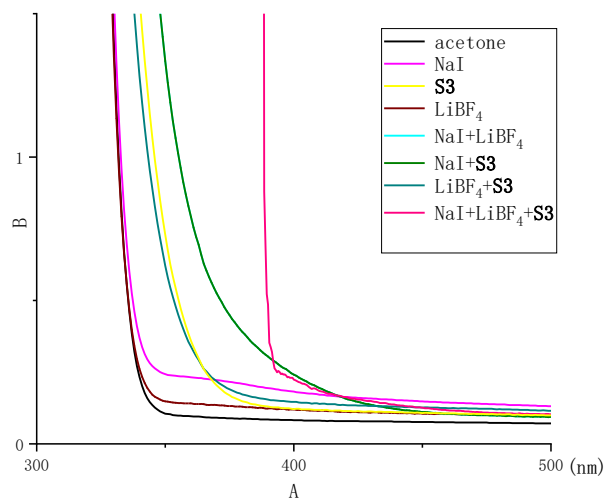

**Figure S3. UV-vis absorption spectra of the reaction of S3**

UV-vis absorption spectra of NaI (0.5 M in acetone), 2-(1-phenylpropoxy)isoindoline-1,3-dione **S3** (0.5 M in acetone), LiBF<sub>4</sub> (0.5 M in acetone), the mixture of NaI and LiBF<sub>4</sub> (0.5 M in acetone), the mixture of NaI and **S3** (0.5 M in acetone), the mixture of **S3** and LiBF<sub>4</sub> (0.5 M in acetone) and the mixture of **S3**, NaI and LiBF<sub>4</sub> (0.5 M in acetone). An obvious red-shift of absorption was observed in the spectrum of the reaction mixture **S3**, NaI and LiBF<sub>4</sub>.

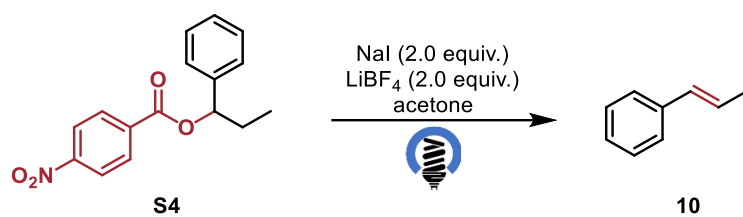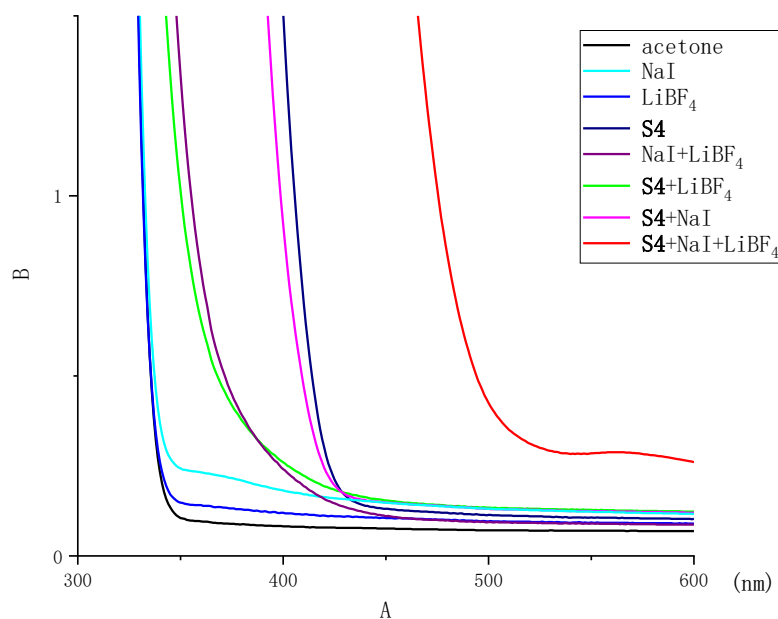

**Figure S4. UV-vis absorption spectra of the reaction of **S4****

UV-vis spectra of NaI (0.5 M in acetone), LiBF<sub>4</sub> (0.5 M in acetone), 1-phenylpropyl 4-nitrobenzoate **S4** (0.5 M in acetone), NaI and LiBF<sub>4</sub> (0.5 M in acetone), **S4** and LiBF<sub>4</sub> (0.5 M in acetone), NaI and **S4** (0.5 M in acetone) and the mixture of **S4**, NaI and LiBF<sub>4</sub> (0.5 M in acetone). An obvious red-shift of absorption was observed in the spectrum of the reaction mixture **S4**, NaI and LiBF<sub>4</sub>.

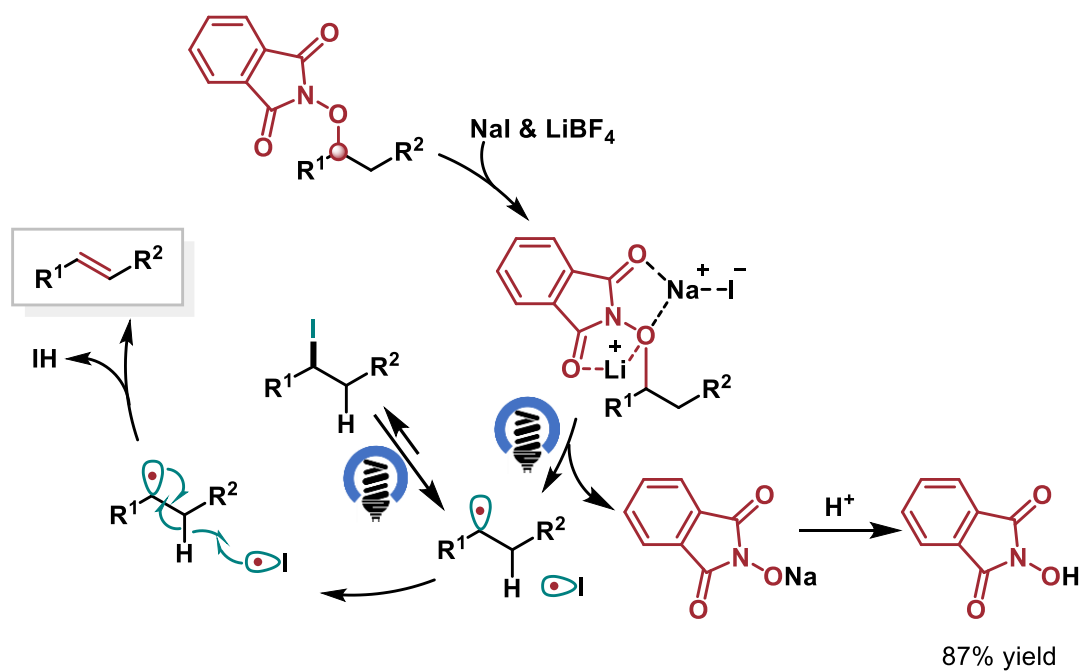

Scheme S1. Proposed mechanism in Scheme 5c.

#### 4. Compound characterization data

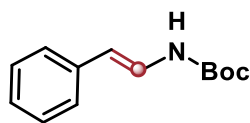

**tert-butyl (*E*)-styrylcarbamate (1):** Following the general procedure A, the title product was obtained after purification by column chromatography (Hexane/EtOAc = 10:1) as a colorless oil (26 mg, 0.118 mmol, 59%, *E/Z* = 92/8). **<sup>1</sup>H NMR** (400 MHz, Chloroform-*d*)  $\delta$  7.25 – 7.04 (m, 5H), 6.41 (s, 1H), 5.89 (d, *J* = 14.5 Hz, 1H), 1.49 (s, 9H). **<sup>13</sup>C NMR** (101 MHz, Chloroform-*d*)  $\delta$  136.6, 128.7, 126.2, 125.3, 124.3, 109.7, 81.0, 28.4. These data are in agreement with those reported previously in the literature.<sup>4</sup>

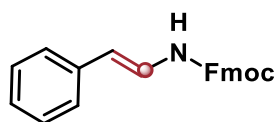

**(9H-fluoren-9-yl)methyl (*E*)-styrylcarbamate (2):** Following the general procedure A, the title product was obtained after purification by column chromatography (Hexane/EtOAc = 5:1) as a white solid (59 mg, 0.136 mmol, 87%, *E/Z* = 92/8). **<sup>1</sup>H NMR** (400 MHz, Chloroform-*d*)  $\delta$  7.82 – 7.74 (m, 2H), 7.60 (dd, *J* = 7.6, 1.2 Hz, 2H), 7.44 – 7.36 (m, 3H), 7.34 – 7.30 (m, 3H), 7.27 (d, *J* = 4.3 Hz, 3H), 7.23 – 7.10 (m, 2H), 6.62 (d, *J* = 11.0 Hz, 1H), 5.97 (d, *J* = 14.6 Hz, 1H), 4.52 (d, *J* = 6.7 Hz, 2H), 4.24 (t, *J* = 6.7 Hz, 1H). **<sup>13</sup>C NMR** (101 MHz, Chloroform-*d*)  $\delta$  143.6, 141.4, 134.5, 127.9, 127.2, 126.9, 125.0, 120.2, 113.8, 112.3, 67.3, 47.1. These data are in agreement with those reported previously in the literature.<sup>4</sup>

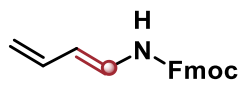

**(9H-fluoren-9-yl)methyl (*E*)-buta-1,3-dien-1-ylcarbamate (3):** Following the general procedure A, the title product was obtained after purification by column chromatography (Hexane/EtOAc = 100:1) as a white solid (49 mg, 0.158 mmol, 79%, *E/Z* = 99/1). **<sup>1</sup>H NMR** (400 MHz, Chloroform-*d*)  $\delta$  7.79 – 7.73 (m, 3H), 7.60 – 7.55 (m, 3H), 7.45 – 7.37 (m, 3H), 7.34 – 7.30 (m, 3H), 6.73 (dd, *J* = 14.0, 11.1 Hz, 1H), 6.48 (d, *J* = 11.1 Hz, 1H), 6.31 – 6.26 (m, 1H), 5.72 – 5.66 (m, 1H), 5.03 (d, *J* = 16.9 Hz, 1H), 4.91 (d, *J* = 10.2 Hz, 1H), 4.48 (d, *J* = 6.8 Hz, 2H), 4.22 (t, *J* = 6.7 Hz, 1H). **<sup>13</sup>C NMR** (101 MHz, Chloroform-*d*)  $\delta$  153.4, 143.6, 141.4, 134.5, 127.9, 127.2, 126.9, 125.0, 120.2, 113.8, 112.4, 67.3, 47.1. These data are in agreement with those reported previously in the literature.<sup>5</sup>

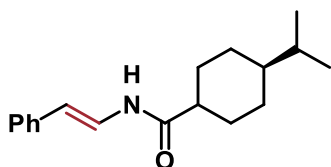

**(E)-4-isopropyl-N-styrylcyclohexane-1-carboxamide (4):** Following the

general procedure A, the title product was obtained after purification by column chromatography (Hexane/EtOAc = 7:1) as a white solid (37 mg, 0.136 mmol, 68%, *E/Z* = 99/1). **<sup>1</sup>H NMR** (400 MHz, Chloroform-*d*) δ 7.52 (dd, *J* = 14.6, 10.8 Hz, 1H), 7.34 (d, *J* = 11.3 Hz, 1H), 7.32 – 7.21 (m, 4H), 7.19 – 7.10 (m, 1H), 6.08 (d, *J* = 14.6 Hz, 1H), 2.11 – 2.05 (m, 1H), 2.04 – 1.91 (m, 2H), 1.91 – 1.74 (m, 2H), 1.64 (s, 1H), 1.58 – 1.31 (m, 3H), 1.18 – 0.92 (m, 2H), 0.86 (s, 3H), 0.85 (s, 3H). **<sup>13</sup>C NMR** (101 MHz, Chloroform-*d*) δ 173.6, 136.2, 128.7, 126.6, 125.6, 122.9, 112.5, 45.9, 43.3, 32.8, 29.7, 29.0, 19.8. **IR** (ATR) ν 3256, 3047, 1653, 1632, 874; **HRMS (ESI)** [M+H]<sup>+</sup> calcd for C<sub>18</sub>H<sub>26</sub>NO 272.2006, found 272.2009.

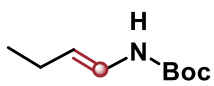

**tert-butyl (E)-but-1-en-1-ylcarbamate (5):** Following the general procedure A, the

title product was obtained after purification by column chromatography (Hexane/EtOAc = 100:1) as a colorless oil (13 mg, 0.076 mmol, 38%, *E/Z* = 93/7). **<sup>1</sup>H NMR** (400 MHz, Chloroform-*d*) δ 6.48 – 6.35 (m, 1H), 6.08 (s, 1H), 4.97 (dt, *J* = 13.8, 6.7 Hz, 1H), 2.06 – 1.89 (m, 3H), 1.44 (s, 9H), 0.96 (t, *J* = 7.4 Hz, 3H). **<sup>13</sup>C NMR** (101 MHz, Chloroform-*d*) δ 153.0, 122.9, 111.7, 80.2, 28.4, 22.9, 14.5. These data are in agreement with those reported previously in the literature.<sup>6</sup>

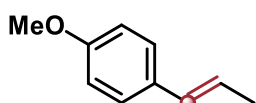

**(E)-1-methoxy-4-(prop-1-en-1-yl)benzene (6):** Following the general procedure

A, the title product was obtained after purification by column chromatography (Hexane/EtOAc = 10:1) as a colorless oil (25 mg, 0.174 mmol, 87%, *E/Z* = 97/3). **<sup>1</sup>H NMR** (400 MHz, Chloroform-*d*) δ 7.26 – 7.23 (m, 2H), 6.82 (d, *J* = 8.7 Hz, 2H), 6.33 (dt, *J* = 15.8, 1.8 Hz, 1H), 6.25 – 5.93 (m, 1H), 3.78 (s, 3H), 1.84 (dd, *J* = 6.6, 1.7 Hz, 3H). **<sup>13</sup>C NMR** (101 MHz, Chloroform-*d*) δ 158.7, 130.9, 130.4, 126.9, 123.6, 114.0, 55.3, 18.5. These data are in agreement with those reported previously in the literature.<sup>7</sup>

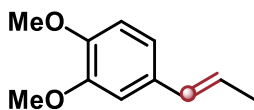

**(E)-1,2-dimethoxy-4-(prop-1-en-1-yl)benzene (7):** Following the general procedure A, the title product was obtained after purification by column chromatography (Hexane/EtOAc = 10:1) as a colorless oil (23 mg, 0.130 mmol, 65% *E/Z* = 99/1). **<sup>1</sup>H NMR** (400 MHz, Chloroform-*d*) δ 6.96 – 6.69 (m, 3H), 6.33 (dq, *J* = 15.7, 1.8 Hz, 1H), 6.09 – 6.05 (m, 1H), 3.86 (s, 3H), 3.85 (s, 3H), 1.85 (dd, *J* = 6.6, 1.7 Hz, 3H). **<sup>13</sup>C NMR** (101 MHz, Chloroform-*d*) δ 149.1, 148.3, 131.3, 130.7, 123.9, 118.7, 111.3, 108.6, 56.0, 55.8, 18.4. These data are in agreement with those reported previously in the literature.<sup>7</sup>

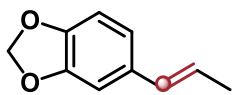

**(E)-5-(prop-1-en-1-yl)benzo[d][1,3]dioxole (8):** Following the general procedure A, the title product was obtained after purification by column chromatography (Hexane/EtOAc = 10:1) as a colorless oil (24 mg, 0.150 mmol, 75%, *E/Z* = 98/2). **<sup>1</sup>H NMR** (400 MHz, Chloroform-*d*) δ 6.89 – 6.78 (m, 1H), 6.73 – 6.72 (m, 2H), 6.30 (dd, *J* = 15.7, 1.7 Hz, 1H), 6.09 – 5.93 (m, 1H), 5.92 (s, 2H), 1.84 (dd, *J* = 6.6, 1.7 Hz, 3H). **<sup>13</sup>C NMR** (101 MHz, Chloroform-*d*) δ 148.0, 146.6, 132.6, 130.6, 124.0, 120.1, 108.3, 105.4, 101.0, 18.4. These data are in agreement with those reported previously in the literature.<sup>8</sup>

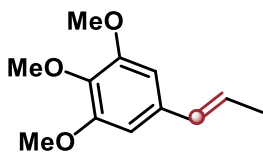

**(E)-1,2,3-trimethoxy-5-(prop-1-en-1-yl)benzene (9):** Following the general procedure A, the title product was obtained after purification by column chromatography (Hexane/EtOAc = 5:1) as a colorless oil (40 mg, 0.192 mmol, 96%, *E/Z* = 94/6). **<sup>1</sup>H NMR** (400 MHz, Chloroform-*d*) δ 6.54 (s, 2H), 6.35 – 6.29 (m, 1H), 6.18 – 6.10 (m, 1H), 3.85 (s, 7H), 3.82 (s, 3H), 1.86 (dd, *J* = 6.5, 1.6 Hz, 3H). **<sup>13</sup>C NMR** (101 MHz, Chloroform-*d*) δ 153.3, 137.1, 133.9, 131.0, 125.5, 102.8, 61.0, 56.1, 18.5. These data are in agreement with those reported previously in the literature.<sup>9</sup>

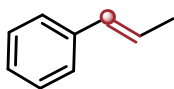

**(E)-prop-1-en-1-ylbenzene (10):** Following the general procedure A, the title product was obtained after purification by column chromatography (Hexane) as a colorless oil (20 mg, 0.170

mmol, 85%, *E/Z* = 99/1). **<sup>1</sup>H NMR** (400 MHz, Chloroform-*d*)  $\delta$  7.40 – 7.27 (m, 4H), 7.24 – 7.17 (m, 1H), 6.44 – 6.41 (m, 1H), 6.39 – 6.21 (m, 1H), 1.90 (dd, *J* = 6.6, 1.6 Hz, 3H). **<sup>13</sup>C NMR** (101 MHz, Chloroform-*d*)  $\delta$  138.0, 131.1, 128.6, 126.9, 125.9, 125.8, 18.7. These data are in agreement with those reported previously in the literature.<sup>8</sup>

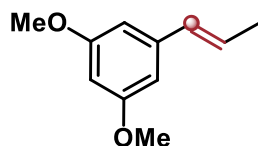

**(*E*)-1,3-dimethoxy-5-(prop-1-en-1-yl)benzene (11):** Following the general

procedure A, the title product was obtained after purification by column chromatography (Hexane/EtOAc = 10:1) as a colorless oil (28 mg, 0.158 mmol, 79%, *E/Z* = 95/5). **<sup>1</sup>H NMR** (400 MHz, Chloroform-*d*)  $\delta$  6.48 (d, *J* = 2.3 Hz, 2H), 6.37 – 6.28 (m, 2H), 6.22 – 6.17 (m, 1H), 3.78 (s, 6H), 1.86 (dt, *J* = 6.4, 1.0 Hz, 3H). **<sup>13</sup>C NMR** (101 MHz, Chloroform-*d*)  $\delta$  160.9, 140.1, 131.1, 126.5, 104.0, 99.1, 55.4, 18.5. These data are in agreement with those reported previously in the literature.<sup>10</sup>

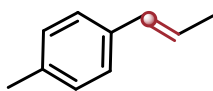

**(*E*)-1-methyl-4-(prop-1-en-1-yl)benzene (12):** Following the general procedure A,

the title product was obtained after purification by column chromatography (Hexane) as a colorless oil (22 mg, 0.166 mmol, 83%, *E/Z* = 98/2). **<sup>1</sup>H NMR** (400 MHz, Cyclohexane-*d*<sub>12</sub>)  $\delta$  7.22 (dd, *J* = 8.2, 2.3 Hz, 2H), 7.09 (dd, *J* = 8.2, 2.3 Hz, 2H), 6.36 (dt, *J* = 15.8, 1.9 Hz, 1H), 6.24 – 6.15 (dm, 1H), 2.32 (s, 3H), 1.86 (dt, *J* = 6.5, 2.0 Hz, 3H). **<sup>13</sup>C NMR** (101 MHz, Chloroform-*d*)  $\delta$  138.0, 131.1, 128.6, 126.9, 125.9, 125.8, 18.7. These data are in agreement with those reported previously in the literature.<sup>11</sup>

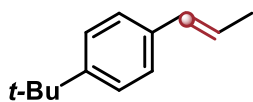

**(*E*)-1-(tert-butyl)-4-(prop-1-en-1-yl)benzene (13):** Following the general

procedure A, the title product was obtained after purification by column chromatography (Hexane) as a colorless oil (29 mg, 0.164 mmol, 82%, *E/Z* = 98/2). **<sup>1</sup>H NMR** (400 MHz, Chloroform-*d*)  $\delta$  7.33 – 7.24 (m, 4H), 6.45 – 6.38 (m, 1H), 6.29 – 5.95 (m, 1H), 1.86 (dd, *J* = 6.5, 1.7 Hz, 3H), 1.31 (s, 9H). **<sup>13</sup>C NMR** (101 MHz, Chloroform-*d*)  $\delta$  149.8, 135.3, 130.8, 125.6, 125.5, 125.0, 34.6, 18.6. These data are in agreement with those reported previously in the literature.<sup>12</sup>



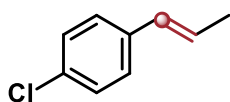

**(E)-1-chloro-4-(prop-1-en-1-yl)benzene (14):** Following the general procedure A,

the title product was obtained after purification by column chromatography (Hexane) as a colorless oil (20 mg, 0.134 mmol, 67%, *E/Z* = 96/4). <sup>1</sup>H NMR (400 MHz, Chloroform-*d*) δ 7.26 – 7.23 (m, 4H), 6.37 – 6.31 (m, 1H), 6.29 – 5.98 (m, 1H), 1.87 (dq, *J* = 6.5, 1.5 Hz, 3H). <sup>13</sup>C NMR (101 MHz, Chloroform-*d*) δ 136.5, 132.3, 130.0, 128.7, 127.1, 126.5, 18.5. These data are in agreement with those reported previously in the literature.<sup>11</sup>

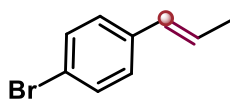

**(E)-1-bromo-4-(prop-1-en-1-yl)benzene (15):** Following the general procedure A,

the title product was obtained after purification by column chromatography (Hexane) as a colorless oil (29 mg, 0.144 mmol, 74%, *E/Z* = 98/2). <sup>1</sup>H NMR (400 MHz, Chloroform-*d*) δ 7.42 – 7.34 (m, 2H), 7.23 – 7.09 (m, 2H), 6.35 – 6.30 (m, 1H), 6.26 – 6.17 (m, 1H), 1.86 (dd, *J* = 6.4, 1.5 Hz, 3H). <sup>13</sup>C NMR (101 MHz, Chloroform-*d*) δ 134.3, 132.1, 126.3, 124.6, 123.8, 121.0, 39.1. These data are in agreement with those reported previously in the literature.<sup>11</sup>

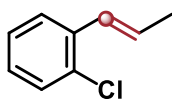

**(E)-1-chloro-2-(prop-1-en-1-yl)benzene (16):** Following the general procedure A, the

title product was obtained after purification by column chromatography (Hexane) as a colorless oil (29 mg, 0.124 mmol, 62%, *E/Z* = 99/1). <sup>1</sup>H NMR (400 MHz, Chloroform-*d*) δ 7.48 – 7.45 (m, 1H), 7.33 – 7.20 (m, 1H), 7.22 – 7.03 (m, 2H), 6.79 – 6.75 (m, 1H), 6.26 – 6.17 (m, 1H), 1.92 (dd, *J* = 6.7, 1.8 Hz, 3H). <sup>13</sup>C NMR (101 MHz, Chloroform-*d*) δ 136.0, 132.5, 129.7, 128.9, 127.9, 127.4, 126.9, 126.7, 18.9. These data are in agreement with those reported previously in the literature.<sup>13</sup>

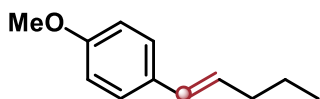

**(E)-1-methoxy-4-(pent-1-en-1-yl)benzene (17):** Following the general

procedure A, the title product was obtained after purification by column chromatography (Hexane/EtOAc 7:1-5:1) as white solid (34 mg, 0.122 mmol, 61%). <sup>1</sup>H NMR (400 MHz, Chloroform-*d*) δ 7.69 (d, *J* = 7.6 Hz, 1H), 7.64 – 7.58 (m, 1H), 7.49 – 7.47 (m, 1H), 7.25 – 7.21 (m, 2H), 7.21 – 7.09 (m, 3H), 3.82 – 3.41 (m, 2H), 2.78 – 2.60 (m, 2H), 2.49 (s, 3H), 2.15 – 1.81 (m, 2H). <sup>13</sup>C NMR (101

MHz, Chloroform-*d*)  $\delta$  168.7, 168.5, 145.3, 141.2, 134.5, 132.6, 129.6, 128.5, 128.5, 126.1, 123.9, 123.2, 37.9, 33.30 30.1, 22.2. These data are in agreement with those reported previously in the literature.<sup>12</sup>

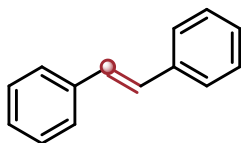

**(E)-1,2-diphenylethene (18):** Following the general procedure A, the title product was obtained after purification by column chromatography (Hexane) as a white solid (32 mg, 0.176 mmol, 88%, *E/Z* = 97/3). <sup>1</sup>H NMR (400 MHz, Chloroform-*d*)  $\delta$  7.40 – 7.03 (m, 10H), 6.61 (s, 2H). <sup>13</sup>C NMR (101 MHz, Chloroform-*d*)  $\delta$  137.4, 130.4, 129.0, 128.3, 127.2. These data are in agreement with those reported previously in the literature.<sup>14</sup>

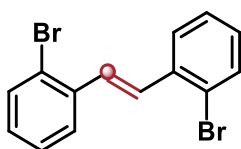

**(E)-1,2-bis(2-bromophenyl)ethene (19):** Following the general procedure A, the title product was obtained after purification by column chromatography (Hexane/EtOAc = 100:1) as a white solid (58 mg, 0.176 mmol, 88% *E/Z* = 95/5). <sup>1</sup>H NMR (400 MHz, Chloroform-*d*)  $\delta$  7.72 (dd, *J* = 7.9, 1.7 Hz, 2H), 7.58 (dd, *J* = 8.0, 1.3 Hz, 2H), 7.39 (s, 2H), 7.36 – 7.30 (m, 2H), 7.17 – 7.10 (m, 2H). <sup>13</sup>C NMR (101 MHz, Chloroform-*d*)  $\delta$  136.9, 133.2, 130.2, 129.3, 127.8, 127.3, 124.4. These data are in agreement with those reported previously in the literature.<sup>15</sup>

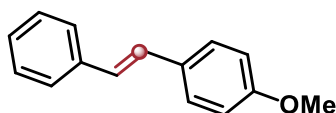

**(E)-1-methoxy-4-styrylbenzene (20):** Following the general procedure A, the title product was obtained after purification by column chromatography (Hexane) as a colorless oil (35 mg, 0.170 mmol, 85%, *E/Z* = 97/3). <sup>1</sup>H NMR (400 MHz, Chloroform-*d*)  $\delta$  7.60 – 7.41 (m, 4H), 7.38 – 7.30 (m, 2H), 7.25 – 7.20 (m, 1H), 7.10 – 6.94 (m, 2H), 6.94 – 6.83 (m, 2H), 3.83 (s, 3H). <sup>13</sup>C NMR (101 MHz, Chloroform-*d*)  $\delta$  159.4, 137.8, 130.3, 128.7, 128.3, 127.8, 127.3, 126.7, 126.3, 114.2, 55.4. These data are in agreement with those reported previously in the literature.<sup>14</sup>

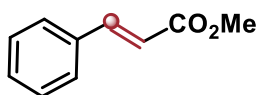

**methyl cinnamate (21):** Following the general procedure A, the title product was obtained after purification by column chromatography (Hexane/EtOAc = 100:1) as a colorless oil

(20 mg, 0.134 mmol, 67% *E/Z* = 96/4). **<sup>1</sup>H NMR** (400 MHz, Chloroform-*d*) δ 7.69 (d, *J* = 16.1 Hz, 1H), 7.58 – 7.45 (m, 2H), 7.45 – 7.30 (m, 3H), 6.43 (d, *J* = 16.0 Hz, 1H), 3.80 (s, 3H). **<sup>13</sup>C NMR** (101 MHz, Chloroform-*d*) δ 167.5, 145.0, 134.5, 130.4, 129.0, 128.2, 117.9, 51.8. These data are in agreement with those reported previously in the literature.<sup>16</sup>

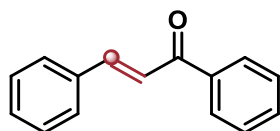

**(E)-chalcone (22):** Following the general procedure A, the title product was

obtained after purification by column chromatography (Hexane/EtOAc = 100:1) as a yellow solid (35 mg, 0.172 mmol, 86% *E/Z* = 96/4). **<sup>1</sup>H NMR** (400 MHz, Chloroform-*d*) δ 8.02 (d, *J* = 7.6 Hz, 2H), 7.82 (d, *J* = 15.7 Hz, 1H), 7.69 – 7.45 (m, 6H), 7.41 (dd, *J* = 4.7, 2.2 Hz, 3H). **<sup>13</sup>C NMR** (101 MHz, Chloroform-*d*) δ 190.7, 145.0, 138.3, 135.0, 133.0, 130.7, 129.1, 128.8, 128.6, 128.6, 122.1. These data are in agreement with those reported previously in the literature.<sup>17</sup>

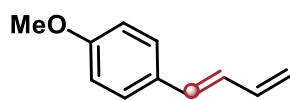

**(E)-1-(buta-1,3-dien-1-yl)-4-methoxybenzene (23):** Following the general

procedure A, the title product was obtained after purification by column chromatography (Hexane) as a colorless oil (29 mg, 0.182 mmol, 91%, *E/Z* = 96/4). **<sup>1</sup>H NMR** (400 MHz, Chloroform-*d*) δ 7.36 – 7.32 (m, 2H), 6.87 – 6.83 (m, 2H), 6.74 – 6.59 (m, 1H), 6.56 – 6.28 (m, 2H), 5.40 – 5.21 (m, 1H), 5.21 – 4.94 (m, 1H), 3.80 (s, 3H). **<sup>13</sup>C NMR** (101 MHz, Chloroform-*d*) δ 159.4, 137.5, 132.5, 130.4, 130.0, 127.8, 116.5, 114.2, 55.4. These data are in agreement with those reported previously in the literature.<sup>6</sup>

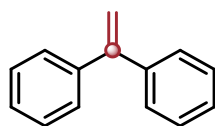

**ethene-1,1-diyl dibenzene (24)** Following the general procedure A, the title product

was obtained after purification by column chromatography (Hexane) as a colorless oil (35 mg, 0.196 mmol, 98%). **<sup>1</sup>H NMR** (400 MHz, Chloroform-*d*) δ 7.38 – 7.35 (m, 10H), 5.50 (d, *J* = 1.6 Hz, 2H). **<sup>13</sup>C NMR** (101 MHz, Chloroform-*d*) δ 150.2, 141.6, 128.4, 128.3, 127.8, 114.4. These data are in agreement with those reported previously in the literature.<sup>9</sup>

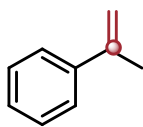

**prop-1-en-2-ylbenzene (25):** Following the general procedure A, the title product was obtained after purification by column chromatography (Hexane) as a colorless oil (20 mg, 0.174 mmol, 87%).  $^1\text{H NMR}$  (400 MHz, Chloroform-*d*)  $\delta$  7.59 – 7.44 (m, 2H), 7.44 – 7.12 (m, 3H), 5.42 (d,  $J$  = 8.6 Hz, 1H), 5.13 (d,  $J$  = 8.2 Hz, 1H), 2.20 (d,  $J$  = 8.7 Hz, 3H).  $^{13}\text{C NMR}$  (101 MHz, Chloroform-*d*)  $\delta$  143.4, 141.3, 128.4, 127.6, 125.6, 112.6, 22.0. These data are in agreement with those reported previously in the literature.<sup>9</sup>

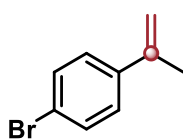

**1-bromo-4-(prop-1-en-2-yl)benzene (26):** Following the general procedure A, the title product was obtained after purification by column chromatography (Hexane) as a colorless oil (36 mg, 0.182 mmol, 91%).  $^1\text{H NMR}$  (400 MHz, Chloroform-*d*)  $\delta$  8.24 – 7.05 (m, 4H), 5.36 (d,  $J$  = 7.2 Hz, 1H), 5.11 (d,  $J$  = 13.6 Hz, 1H), 2.12 (s, 3H).  $^{13}\text{C NMR}$  (101 MHz, Chloroform-*d*)  $\delta$  142.3, 140.2, 131.4, 127.3, 121.4, 113.2, 21.8. These data are in agreement with those reported previously in the literature.<sup>9</sup>

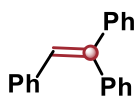

**ethene-1,1,2-triyltribenzene (27):** Following the general procedure A, the title product was obtained after purification by column chromatography (Hexane/EtOAc = 100:1) as a white solid (45 mg, 0.178 mmol, 89%).  $^1\text{H NMR}$  (400 MHz, Chloroform-*d*)  $\delta$  7.41 – 7.31 (m, 8H), 7.29 – 7.23 (m, 2H), 7.21 – 7.13 (m, 3H), 7.11 – 7.06 (m, 2H), 7.02 (s, 1H).  $^{13}\text{C NMR}$  (101 MHz, Chloroform-*d*)  $\delta$  143.6, 142.7, 140.5, 137.5, 130.6, 129.7, 128.8, 128.4, 128.3, 128.1, 127.8, 127.7, 127.6, 126.9. These data are in agreement with those reported previously in the literature.<sup>18</sup>

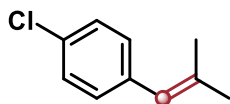

**1-chloro-4-(2-methylprop-1-en-1-yl)benzene (28):** Following the general procedure A, the title product was obtained after purification by column chromatography (Hexane) as a colorless oil (28 mg, 0.170 mmol, 85%).  $^1\text{H NMR}$  (400 MHz, Chloroform-*d*)  $\delta$  7.35 – 7.17 (m, 3H), 7.13 (d,  $J$  = 8.4 Hz, 2H), 6.20 (s, 1H), 1.89 (d,  $J$  = 1.5 Hz, 3H), 1.83 (d,  $J$  = 1.3 Hz, 3H).  $^{13}\text{C NMR}$  (101

MHz, Chloroform-*d*)  $\delta$  137.2, 136.4, 131.5, 130.1, 128.2, 124.1, 26.9, 19.4. These data are in agreement with those reported previously in the literature<sup>19</sup>

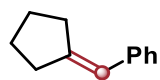

**(cyclopentylidene)methylbenzene (29):** Following the general procedure A, the title product was obtained after purification by column chromatography (Hexane) as a colorless oil (28 mg, 0.178 mmol, 89%). **<sup>1</sup>H NMR** (400 MHz, Chloroform-*d*)  $\delta$  7.37 – 7.29 (m, 4H), 7.21 – 7.09 (m, 1H), 6.37 (p, *J* = 2.3 Hz, 1H), 2.60 – 2.55 (m, 2H), 2.54 – 2.45 (m, 2H), 1.88 – 1.74 (m, 2H), 1.74 – 1.63 (m, 2H). **<sup>13</sup>C NMR** (101 MHz, Chloroform-*d*)  $\delta$  147.3, 139.0, 128.3, 128.0, 125.7, 120.9, 36.1, 31.3, 27.3, 25.8. These data are in agreement with those reported previously in the literature.<sup>20</sup>

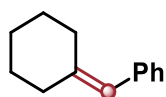

**(cyclohexylidene)methylbenzene (30):** Following the general procedure A, the title product was obtained after purification by column chromatography (Hexane) as a colorless oil (28 mg, 0.144 mmol, 81%). **<sup>1</sup>H NMR** (500 MHz, Chloroform-*d*)  $\delta$  7.33 – 7.27 (m, 2H), 7.24 – 7.12 (m, 3H), 6.22 (s, 1H), 2.79 – 2.35 (m, 2H), 2.35 – 2.09 (m, 2H), 1.90 – 1.57 (m, 6H). **<sup>13</sup>C NMR** (101 MHz, Chloroform-*d*)  $\delta$  143.6, 138.5, 129.0, 128.1, 125.9, 122.0, 37.8, 29.5, 28.7, 28.0, 26.8.<sup>20</sup>

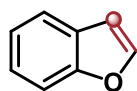

**benzofuran (31):** Following the general procedure A, the title product was obtained after purification by column chromatography (Hexane) as a colorless oil (17 mg, 0.144 mmol, 72%). **<sup>1</sup>H NMR** (400 MHz, Chloroform-*d*)  $\delta$  7.66 – 7.56 (m, 2H), 7.53 – 7.45 (m, 1H), 7.33 – 7.27 (m, 1H), 7.24 – 7.19 (m, 1H), 6.77 (dd, *J* = 2.2, 1.0 Hz, 1H). **<sup>13</sup>C NMR** (101 MHz, Chloroform-*d*)  $\delta$  155.0, 145.0, 127.5, 124.3, 122.8, 121.2, 111.5, 106.6. These data are in agreement with those reported previously in the literature.<sup>21</sup>

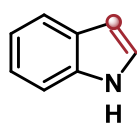

**1H-indole (32):** Following the general procedure A, the title product was obtained after purification by column chromatography (Hexane/EtOAc = 100:1) as a yellow solid (18 mg, 0.154 mmol, 77%). **<sup>1</sup>H NMR** (400 MHz, Chloroform-*d*)  $\delta$  8.11 – 7.64 (m, 2H), 7.58 – 7.21 (m, 3H), 7.18 – 7.08 (m,

1H), 6.80 – 6.43 (m, 1H). <sup>13</sup>C NMR (101 MHz, Chloroform-*d*) δ 135.9, 128.0, 124.4, 122.1, 120.9, 120.0, 111.2, 102.7 These data are in agreement with those reported previously in the literature.<sup>22</sup>

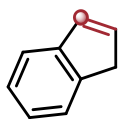

**1H-indene (33):** Following the general procedure A, the title product was obtained after purification by column chromatography (Hexane) as a colorless oil (17 mg, 0.138 mmol, 69%). <sup>1</sup>H NMR (400 MHz, Chloroform-*d*) δ 7.50 – 7.42 (dq, *J* = 7.3, 0.9 Hz, 1H), 7.41 – 7.40 (m, 1H), 7.32 – 7.26 (m, 1H), 7.22 – 7.16 (m, 1H), 6.91 – 6.85 (m, 1H), 6.56 (dt, *J* = 5.5, 2.0 Hz, 1H), 3.74 – 3.25 (m, 2H). <sup>13</sup>C NMR (101 MHz, Chloroform-*d*) δ 137.0, 131.6, 131.3, 130.5, 130.0, 127.5, 126.7, 120.4, 18.6. These data are in agreement with those reported previously in the literature.<sup>23</sup>

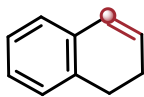

**1,2-dihydronaphthalene (34):** Following the general procedure A, the title product was obtained after purification by column chromatography (Hexane) as a colorless oil (15 mg, 0.116 mmol, 58%). <sup>1</sup>H NMR (400 MHz, Chloroform-*d*) δ 7.20 – 7.07 (m, 3H), 7.03 (dd, *J* = 6.7, 1.8 Hz, 1H), 6.47 (dt, *J* = 9.6, 1.9 Hz, 1H), 6.04 (dt, *J* = 9.6, 4.4 Hz, 1H), 2.86 – 2.74 (m, 2H), 2.37 – 2.29 (m, 2H). <sup>13</sup>C NMR (101 MHz, Chloroform-*d*) δ 135.6, 134.2, 128.8, 127.9, 127.6, 127.0, 126.5, 126.0, 27.6, 23.3. These data are in agreement with those reported previously in the literature.<sup>21</sup>

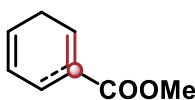

**methyl cyclohexa-1,4-diene-1-carboxylate (35):** Following the general procedure A, the title product was obtained after purification by column chromatography (Hexane) as a colorless oil (20 mg, 0.146 mmol, 73%). <sup>1</sup>H NMR (400 MHz, Chloroform-*d*) δ 6.96 – 6.90 (m, 1H), 5.82 – 5.69 (m, 1H), 5.69 – 5.54 (m, 1H), 3.72 (s, 3H), 2.98 – 2.75 (m, 4H). <sup>13</sup>C NMR (101 MHz, Chloroform-*d*) δ 167.6, 136.6, 127.6, 124.4, 122.4, 51.7, 27.1, 25.2. These data are in agreement with those reported previously in the literature.<sup>24</sup>

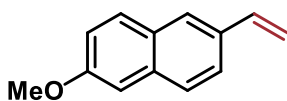

**2-methoxy-6-vinylnaphthalene (36):** Following the general procedure A, the title product was obtained after purification by column chromatography (Hexane/EtOAc = 100:1) as a

white solid (35 mg, 0.192 mmol, 96%).  $^1\text{H NMR}$  (400 MHz, Chloroform-*d*)  $\delta$  7.86 – 7.66 (m, 3H), 7.66 – 7.53 (m, 1H), 7.24 – 7.02 (m, 2H), 6.85 (dd,  $J = 17.5, 10.9$  Hz, 1H), 5.82 (dd,  $J = 17.6, 1.0$  Hz, 1H), 5.28 (dd,  $J = 10.9, 1.0$  Hz, 1H), 3.91 (s, 3H).  $^{13}\text{C NMR}$  (101 MHz, Chloroform-*d*)  $\delta$  157.9, 137.0, 134.4, 133.1, 129.7, 129.0, 127.1, 126.3, 123.9, 119.1, 113.2, 106.0, 55.4. These data are in agreement with those reported previously in the literature.<sup>14</sup>

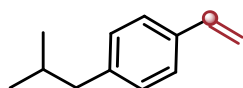

**1-isobutyl-4-vinylbenzene (37):** Following the general procedure A, the title

product was obtained after purification by column chromatography (Hexane) as a colorless oil (23 mg, 0.144 mmol, 72%).  $^1\text{H NMR}$  (400 MHz, Chloroform-*d*)  $\delta$  7.40 – 7.29 (m, 2H), 7.19 – 6.98 (m, 2H), 6.69 (dd,  $J = 17.6, 10.9$  Hz, 1H), 5.70 (dd,  $J = 17.6, 1.0$  Hz, 1H), 5.18 (dd,  $J = 10.9, 1.0$  Hz, 1H), 2.45 (d,  $J = 7.2$  Hz, 2H), 1.85 (dt,  $J = 13.3, 6.7$  Hz, 1H), 0.89 (d,  $J = 6.6$  Hz, 7H).  $^{13}\text{C NMR}$  (101 MHz, Chloroform-*d*)  $\delta$  141.6, 136.8, 135.1, 129.4, 126.1, 112.9, 45.3, 30.3, 22.5. These data are in agreement with those reported previously in the literature.<sup>21</sup>

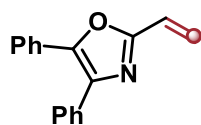

**4,5-diphenyl-2-vinyloxazole (38):** Following the general procedure A, the title

product was obtained after purification by column chromatography (Hexane/EtOAc = 10:1) as a colorless oil (26 mg, 0.106 mmol, 53%).  $^1\text{H NMR}$  (400 MHz, Chloroform-*d*)  $\delta$  7.71 – 7.58 (m, 4H), 7.48 – 7.29 (m, 6H), 6.67 (dd,  $J = 17.7, 11.2$  Hz, 1H), 6.27 (dd,  $J = 17.6, 1.0$  Hz, 1H), 5.67 (dd,  $J = 11.2, 1.0$  Hz, 1H).  $^{13}\text{C NMR}$  (101 MHz, Chloroform-*d*)  $\delta$  159.6, 145.4, 136.6, 132.5, 128.9, 128.8, 128.7, 128.3, 128.1, 126.7, 123.4, 122.0. These data are in agreement with those reported previously in the literature.<sup>25</sup>

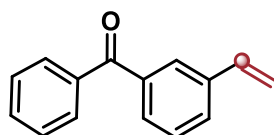

**phenyl(4-vinylphenyl)methanone (39):** Following the general procedure A,

the title product was obtained after purification by column chromatography (Hexane/EtOAc = 100:1) as a colorless oil (73 mg, 0.158 mmol, 79%).  $^1\text{H NMR}$  (400 MHz, Chloroform-*d*)  $\delta$  7.85 – 7.77 (m, 3H), 7.69 – 7.57 (m, 3H), 7.57 – 7.37 (m, 3H), 6.75 (dd,  $J = 17.6, 10.9$  Hz, 1H), 5.80 (dd,  $J = 17.5, 0.7$  Hz,

1H), 5.32 (dd,  $J = 10.9, 0.7$  Hz, 1H).  $^{13}\text{C}$  NMR (101 MHz, Chloroform- $d$ )  $\delta$  196.8, 138.0, 137.9, 137.6, 136.1, 132.6, 130.2, 130.0, 129.5, 128.5, 128.4, 127.8, 115.4. These data are in agreement with those reported previously in the literature.<sup>21</sup>

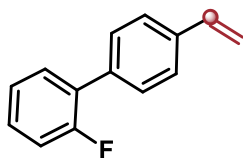

**2-fluoro-4'-vinyl-1,1'-biphenyl (40):** Following the general procedure A, the title

product was obtained after purification by column chromatography (Hexane) as a colorless oil (28 mg, 0.142 mmol, 71%).  $^1\text{H}$  NMR (400 MHz, Chloroform- $d$ )  $\delta$  7.57 – 7.54 (m, 2H), 7.50 – 7.34 (m, 4H), 7.25 – 7.16 (m, 2H), 6.70 (dd,  $J = 17.6, 10.9$  Hz, 1H), 5.79 (d,  $J = 17.5$  Hz, 1H), 5.32 (d,  $J = 10.9$  Hz, 1H).  $^{13}\text{C}$  NMR (101 MHz, Chloroform- $d$ )  $\delta$  161.3, 158.8, 139.0, 138.9, 135.6, 130.8, 130.8, 129.0, 129.0, 128.6, 128.3, 127.8, 122.5, 122.5, 115.3, 113.6, 113.4. These data are in agreement with those reported previously in the literature.<sup>26</sup>

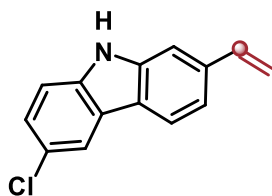

**6-chloro-2-vinyl-9H-carbazole (41):** Following the general procedure A, the

title product was obtained after purification by column chromatography (Hexane/EtOAc = 10:1) as a colorless oil (35 mg, 0.156 mmol, 78%).  $^1\text{H}$  NMR (400 MHz, Acetone- $d_6$ )  $\delta$  10.50 (s, 1H), 8.23 – 7.93 (m, 2H), 7.56 (d,  $J = 1.4$  Hz, 1H), 7.48 (d,  $J = 8.6$  Hz, 1H), 7.36 – 7.32 (m, 2H), 6.87 (dd,  $J = 17.6, 10.9$  Hz, 1H), 5.85 (dd,  $J = 17.6, 1.0$  Hz, 1H), 5.23 (dd,  $J = 10.9, 1.0$  Hz, 1H).  $^{13}\text{C}$  NMR (101 MHz, Acetone- $d_6$ )  $\delta$  141.2, 139.1, 137.8, 136.3, 125.5, 124.3, 124.0, 122.1, 120.6, 119.7, 117.7, 112.9, 112.3, 109.1. IR (ATR)  $\nu$  3674, 2987, 1736, 1450, 1054, 892  $\text{cm}^{-1}$ . HRMS (ESI)  $[\text{M}-\text{H}]^-$  calcd for  $\text{C}_{14}\text{H}_9\text{NCl}$  226.0429, found 226.0425.

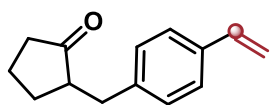

**2-(4-vinylbenzyl)cyclopentan-1-one (42):** Following the general procedure A,

the title product was obtained after purification by column chromatography (Hexane/EtOAc = 100:1) as a colorless oil (34 mg, 0.170 mmol, 85%).  $^1\text{H}$  NMR (400 MHz, Chloroform- $d$ )  $\delta$  7.53 – 7.30 (m, 2H),



7.21 – 7.01 (m, 2H), 6.68 (dd,  $J = 17.6, 10.9$  Hz, 1H), 5.70 (dd,  $J = 17.6, 1.0$  Hz, 1H), 5.19 (dd,  $J = 10.9, 1.0$  Hz, 1H), 3.11 (dd,  $J = 13.9, 4.2$  Hz, 1H), 2.53 (dd,  $J = 13.9, 9.4$  Hz, 1H), 2.42 – 2.26 (m, 2H), 2.17 – 2.01 (m, 2H), 2.01 – 1.90 (m, 1H), 1.80 – 1.66 (m, 1H), 1.54 (dtd,  $J = 12.6, 10.8, 6.6$  Hz, 1H).  $^{13}\text{C}$  NMR (101 MHz, Chloroform-*d*)  $\delta$  220.3, 139.8, 136.6, 135.7, 129.2, 126.4, 113.3, 51.0, 38.3, 35.4, 29.2, 20.6. These data are in agreement with those reported previously in the literature.<sup>27</sup>

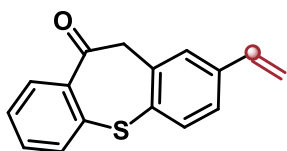

**2-vinyldibenzo[b,f]thiepin-10(11H)-one (43):** Following the general procedure A, the title product was obtained after purification by column chromatography (Hexane/EtOAc = 10:1) as a colorless oil (34 mg, 0.134 mmol, 67%).  $^1\text{H}$  NMR (400 MHz, Chloroform-*d*)  $\delta$  8.19 (dd,  $J = 8.0, 1.7$  Hz, 1H), 7.63 – 7.55 (m, 2H), 7.47 (d,  $J = 1.9$  Hz, 1H), 7.43 – 7.39 (m, 1H), 7.32 – 7.27 (m, 1H), 7.22 (dd,  $J = 8.0, 1.9$  Hz, 1H), 6.67 (dd,  $J = 17.6, 10.9$  Hz, 1H), 5.78 (dd,  $J = 17.5, 0.7$  Hz, 1H), 5.30 (dd,  $J = 10.9, 0.8$  Hz, 1H), 4.36 (s, 2H).  $^{13}\text{C}$  NMR (101 MHz, Chloroform-*d*)  $\delta$  191.5, 140.4, 139.5, 137.9, 136.2, 135.7, 133.7, 132.6, 131.6, 131.5, 130.9, 127.1, 126.9, 125.1, 115.6, 51.1. IR (ATR)  $\nu$  3674, 2987, 1406, 1066, 725  $\text{cm}^{-1}$ . HRMS (ESI)  $[\text{M}+\text{H}]^+$  calcd for  $\text{C}_{16}\text{H}_{13}\text{OS}$  253.0682, found 253.0682.

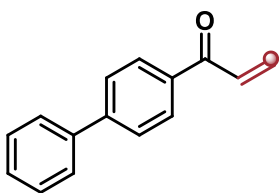

**1-([1,1'-biphenyl]-4-yl)prop-2-en-1-one (44):** Following the general procedure A, the title product was obtained after purification by column chromatography (Hexane/EtOAc = 100:1) as a colorless oil (32 mg, 0.154 mmol, 77%).  $^1\text{H}$  NMR (400 MHz, Chloroform-*d*)  $\delta$  8.09 – 7.94 (m, 2H), 7.75 – 7.67 (m, 2H), 7.66 – 7.56 (m, 2H), 7.51 – 7.43 (m, 2H), 7.40 (d,  $J = 7.1$  Hz, 1H), 7.22 – 7.13 (m, 1H), 6.54 – 6.37 (m, 1H), 5.94 (dt,  $J = 10.6, 2.0$  Hz, 1H).  $^{13}\text{C}$  NMR (101 MHz, Chloroform-*d*)  $\delta$  190.6, 145.8, 140.0, 136.1, 132.4, 130.2, 129.5, 129.4, 129.1, 128.4, 127.4. These data are in agreement with those reported previously in the literature.<sup>28</sup>

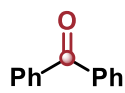

**benzophenone (45):** Following the general procedure A, the title product was obtained after purification by column chromatography (Hexane/EtOAc = 100:1) as a colorless oil (32 mg, 0.176 mmol, 88%).  $^1\text{H NMR}$  (400 MHz, Chloroform-*d*)  $\delta$  7.96 – 7.69 (m, 4H), 7.68 – 7.53 (m, 2H), 7.53 – 7.39 (m, 4H).  $^{13}\text{C NMR}$  (101 MHz, Chloroform-*d*)  $\delta$  196.9, 137.7, 132.6, 130.2, 128.4. These data are in agreement with those reported previously in the literature.<sup>29</sup>

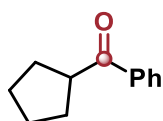

**cyclopentyl(phenyl)methanone (46):** Following the general procedure A, the title product was obtained after purification by column chromatography (Hexane) as a colorless oil (28 mg, 0.160 mmol, 80%).  $^1\text{H NMR}$  (400 MHz, Chloroform-*d*)  $\delta$  8.03 – 7.87 (m, 2H), 7.57 – 7.48 (m, 1H), 7.48 – 7.37 (m, 2H), 3.70 (p,  $J = 7.9$  Hz, 1H), 2.03 – 1.82 (m, 4H), 1.82 – 1.46 (m, 4H).  $^{13}\text{C NMR}$  (101 MHz, Chloroform-*d*)  $\delta$  202.9, 137.0, 132.8, 128.6, 128.5, 46.4, 30.1, 26.4. These data are in agreement with those reported previously in the literature.<sup>29</sup>

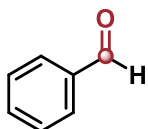

**benzaldehyde (47):** Following the general procedure A, the title product was obtained after purification by column chromatography (Hexane) as a colorless oil (18 mg, 0.170 mmol, 85%).  $^1\text{H NMR}$  (400 MHz, Chloroform-*d*)  $\delta$  9.93 (s, 1H), 7.81 – 7.77 (m, 2H), 7.67 – 7.51 (m, 1H), 7.51 – 7.26 (m, 2H).  $^{13}\text{C NMR}$  (101 MHz, Chloroform-*d*)  $\delta$  192.4, 136.5, 134.5, 129.7, 129.0. These data are in agreement with those reported previously in the literature.<sup>29</sup>

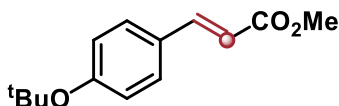

**methyl (*E*)-3-(4-(*tert*-butoxy)phenyl)acrylate (48):** Following the general procedure B, the title product was obtained after purification by column chromatography (Hexane/EtOAc = 10:1) as a colorless oil (19 mg, 0.085 mmol, 85%, *E/Z* = 98/2).  $^1\text{H NMR}$  (400 MHz, Chloroform-*d*)  $\delta$  7.65 (d,  $J = 16.0$  Hz, 1H), 7.43 (d,  $J = 8.7$  Hz, 2H), 6.98 (d,  $J = 8.7$  Hz, 2H), 6.44 – 6.22 (m, 1H), 3.78 (s, 3H), 1.37 (s, 9H).  $^{13}\text{C NMR}$  (101 MHz, Chloroform-*d*)  $\delta$  167.8, 157.9, 144.6, 129.3,

129.1, 123.9, 116.2, 79.4, 51.7, 29.0. These data are in agreement with those reported previously in the literature.<sup>30</sup>

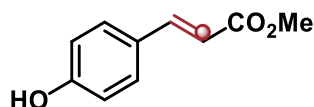

**methyl (*E*)-3-(4-hydroxyphenyl)acrylate (49):** Following the general procedure B, the title product was obtained after purification by column chromatography (Hexane/EtOAc = 10:1) as a colorless oil (13 mg, 0.074 mmol, 74%, *E/Z* = 97/3). **<sup>1</sup>H NMR** (500 MHz, Acetonitrile-*d*<sub>3</sub>) δ 7.57 (d, *J* = 16.0 Hz, 1H), 7.54 – 7.22 (m, 3H), 6.93 – 6.69 (m, 2H), 6.31 (dd, *J* = 16.0, 1.2 Hz, 1H), 3.69 (s, 3H). **<sup>13</sup>C NMR** (126 MHz, Acetonitrile-*d*<sub>3</sub>) δ 167.5, 159.2, 144.5, 130.2, 126.4, 115.8, 114.8, 51.1. These data are in agreement with those reported previously in the literature.<sup>31</sup>

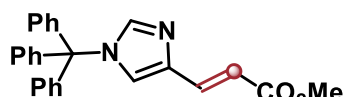

**methyl (*E*)-3-(1-trityl-1H-imidazol-4-yl)acrylate (50):** Following the general procedure B, the title product was obtained after purification by column chromatography (Hexane/EtOAc = 10:1) as a colorless oil (18 mg, 0.047 mmol, 47%, *E/Z* = 99/1). **<sup>1</sup>H NMR** (500 MHz, Chloroform-*d*) δ 7.55 – 7.43 (m, 2H), 7.38 – 7.30 (m, 9H), 7.17 – 7.07 (m, 6H), 7.01 (d, *J* = 1.3 Hz, 1H), 6.53 (d, *J* = 15.6 Hz, 1H), 3.74 (s, 3H). **<sup>13</sup>C NMR** (126 MHz, Chloroform-*d*) δ 168.1, 142.0, 140.4, 137.1, 136.5, 129.8, 128.4, 128.3, 124.2, 115.8, 75.8, 51.6. These data are in agreement with those reported previously in the literature.<sup>32</sup>

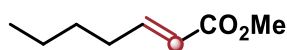

**methyl (*E*)-hept-2-enoate (51):** Following the general procedure B, the title product was obtained after purification by column chromatography (Hexane/EtOAc = 10:1) as a colorless oil (13 mg, 0.051 mmol, 51%, *E/Z* = 98/2). **<sup>1</sup>H NMR** (500 MHz, Chloroform-*d*) δ 6.92 (dt, *J* = 15.7, 7.0 Hz, 1H), 5.77 (dt, *J* = 15.6, 1.6 Hz, 1H), 3.67 (s, 3H), 2.25 – 2.04 (m, 2H), 1.43 (h, *J* = 7.4 Hz, 2H), 0.88 (t, *J* = 7.4 Hz, 3H). **<sup>13</sup>C NMR** (126 MHz, Chloroform-*d*) δ 167.2, 149.6, 121.0, 51.4, 34.3, 21.3, 13.7. These data are in agreement with those reported previously in the literature.<sup>33</sup>

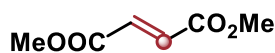

**dimethyl fumarate (52):** Following the general procedure B, the title product was obtained after purification by column chromatography (Hexane/EtOAc = 10:1) as a colorless oil (9.5 mg, 0.066 mmol, 66%, *E/Z* = 96/4). **<sup>1</sup>H NMR** (500 MHz, Chloroform-*d*) δ 6.80 (s, 2H), 3.75 (s,

6H).  $^{13}\text{C}$  NMR (126 MHz, Chloroform-*d*)  $\delta$  165.4, 133.5, 52.4. These data are in agreement with those reported previously in the literature.<sup>34</sup>

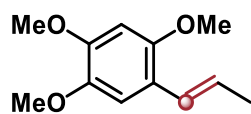

(*E*)-1,2,4-trimethoxy-5-(prop-1-en-1-yl)benzene (**53**): Following the general procedure C, the title product was obtained after purification by column chromatography (Hexane/EtOAc = 5:1) as a colorless oil (25 mg, 0.124 mmol, 62%, *E/Z* = 96/4).  $^1\text{H}$  NMR (400 MHz, Chloroform-*d*)  $\delta$  6.93 (s, 1H), 6.79 – 6.60 (m, 1H), 6.48 (s, 1H), 6.08 (dq, *J* = 15.8, 6.6 Hz, 1H), 3.87 (s, 3H), 3.84 (s, 3H), 3.81 (s, 3H), 1.87 (dd, *J* = 6.6, 1.8 Hz, 3H).  $^{13}\text{C}$  NMR (101 MHz, Chloroform-*d*)  $\delta$  150.6, 148.7, 143.3, 125.1, 124.5, 118.9, 109.6, 97.8, 56.8, 56.5, 56.2, 19.0. These data are in agreement with those reported previously in the literature.<sup>12</sup>

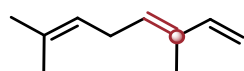

(*E*)-3,7-dimethylocta-1,3,6-triene (**54**): Following the general procedure C, the title product was obtained after purification by column chromatography (Hexane) as a colorless oil (19 mg, 0.140 mmol, 70%, *E/Z* = 98/2).  $^1\text{H}$  NMR (400 MHz, Chloroform-*d*)  $\delta$  6.84 – 6.76 (m, 1H), 5.34 (ddt, *J* = 9.1, 7.6, 1.5 Hz, 1H), 5.19 (dt, *J* = 17.3, 1.2 Hz, 1H), 5.15 – 5.01 (m, 2H), 2.99 – 2.71 (m, 2H), 1.81 (s, 3H), 1.69 (s, 3H), 1.63 (s, 3H).  $^{13}\text{C}$  NMR (101 MHz, Chloroform-*d*)  $\delta$  133.7, 132.2, 132.0, 129.8, 122.6, 113.7, 26.5, 25.8, 19.9, 17.8. These data are in agreement with those reported previously in the literature.<sup>35</sup>

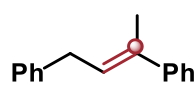

(*E*)-but-2-ene-1,3-diyl dibenzene (**55**): Following the general procedure C, the title product was obtained after purification by column chromatography (Hexane) as a colorless oil (33 mg, 0.162 mmol, 81%, *E/Z* = 91/9).  $^1\text{H}$  NMR (500 MHz, Chloroform-*d*)  $\delta$  7.43 – 7.39 (m, 2H), 7.37 – 7.27 (m, 5H), 7.24 – 7.17 (m, 3H), 5.99 – 5.97 (m, 1H), 3.57 (d, *J* = 7.4 Hz, 2H), 2.14 (s, 3H).  $^{13}\text{C}$  NMR (126 MHz, Chloroform-*d*)  $\delta$  143.7, 141.1, 135.8, 128.6, 128.5, 128.3, 126.8, 126.2, 126.1, 125.8, 35.1, 16.1. These data are in agreement with those reported previously in the literature.<sup>36</sup>

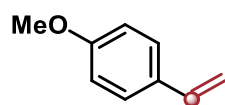

1-methoxy-4-vinylbenzene (**56**): Following the general procedure C, the title product was obtained after purification by column chromatography (Hexane/EtOAc = 100:1) as a

colorless oil (15 mg, 0.116mmol, 58%).  $^1\text{H NMR}$  (400 MHz, Chloroform-*d*)  $\delta$  7.39 – 7.30 (m, 2H), 6.93 – 6.77 (m, 2H), 6.65 (dd,  $J = 17.6, 10.9$  Hz, 1H), 5.60 (dd,  $J = 17.6, 1.0$  Hz, 1H), 5.12 (dd,  $J = 10.9, 1.0$  Hz, 1H), 3.80 (s, 3H).  $^{13}\text{C NMR}$  (101 MHz, Chloroform-*d*)  $\delta$  159.4, 136.3, 130.5, 127.5, 114.0, 111.7, 55.4. These data are in agreement with those reported previously in the literature.<sup>37</sup>

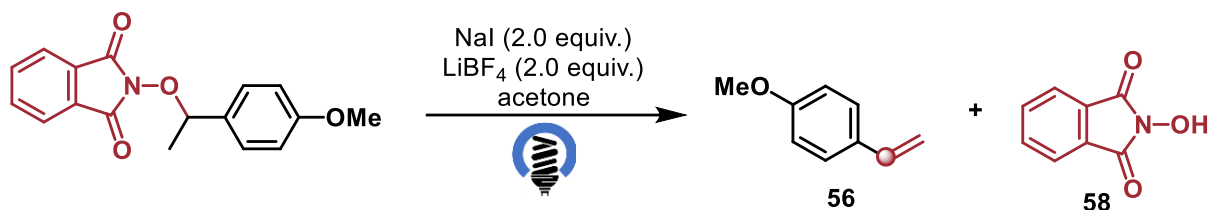

**2-hydroxyisoindoline-1,3-dione 58** was obtained with 87% yield (28 mg, 0.174mmol).  $^1\text{H NMR}$  (400 MHz, DMSO-*d*<sub>6</sub>)  $\delta$  10.81 (s, 1H), 7.78 (s, 4H).  $^{13}\text{C NMR}$  (101 MHz, DMSO-*D*<sub>6</sub>)  $\delta$  164.7, 135.1, 129.2, 123.5. These data are in agreement with those reported previously in the literature.<sup>38</sup>

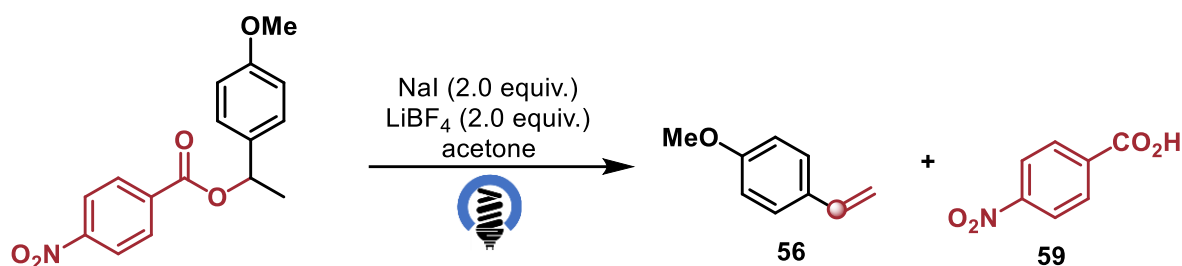

**4-nitrobenzoic acid 59** was obtained with 74% yield (25 mg, 0.148mmol).  $^1\text{H NMR}$  (400 MHz, DMSO-*d*<sub>6</sub>)  $\delta$  8.27 (d,  $J = 8.5$  Hz, 2H), 8.24 – 7.93 (d,  $J = 8.5$  Hz, 2H).  $^{13}\text{C NMR}$  (101 MHz, DMSO-*D*<sub>6</sub>)  $\delta$  166.2, 150.3, 136.6, 131.0, 124.1. These data are in agreement with those reported previously in the literature.<sup>39</sup>

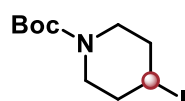

**tert-butyl 4-iodopiperidine-1-carboxylate(60)**. Following the general procedure A, the title product was obtained after purification by column chromatography (Hexane/EtOAc = 50:1) as a colorless oil (39 mg, 0.126mmol, 63%).  $^1\text{H NMR}$  (400 MHz, Chloroform-*d*)  $\delta$  4.45 – 4.41 (m, 1H), 3.56 (dt,  $J = 13.7, 5.1$  Hz, 2H), 3.26 (dt,  $J = 13.7, 5.8$  Hz, 2H), 2.00 (q,  $J = 5.7$  Hz, 4H), 1.43 (s, 9H)..  $^{13}\text{C NMR}$  (101 MHz, Chloroform-*d*)  $\delta$  159.4, 136.3, 130.5, 127.5, 114.0, 111.7, 55.4. These data are in agreement with those reported previously in the literature.<sup>40</sup>

## 5. NMR spectra

$^1\text{H}$  NMR of compound **1** (400 MHz in  $\text{CDCl}_3$ )

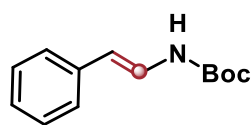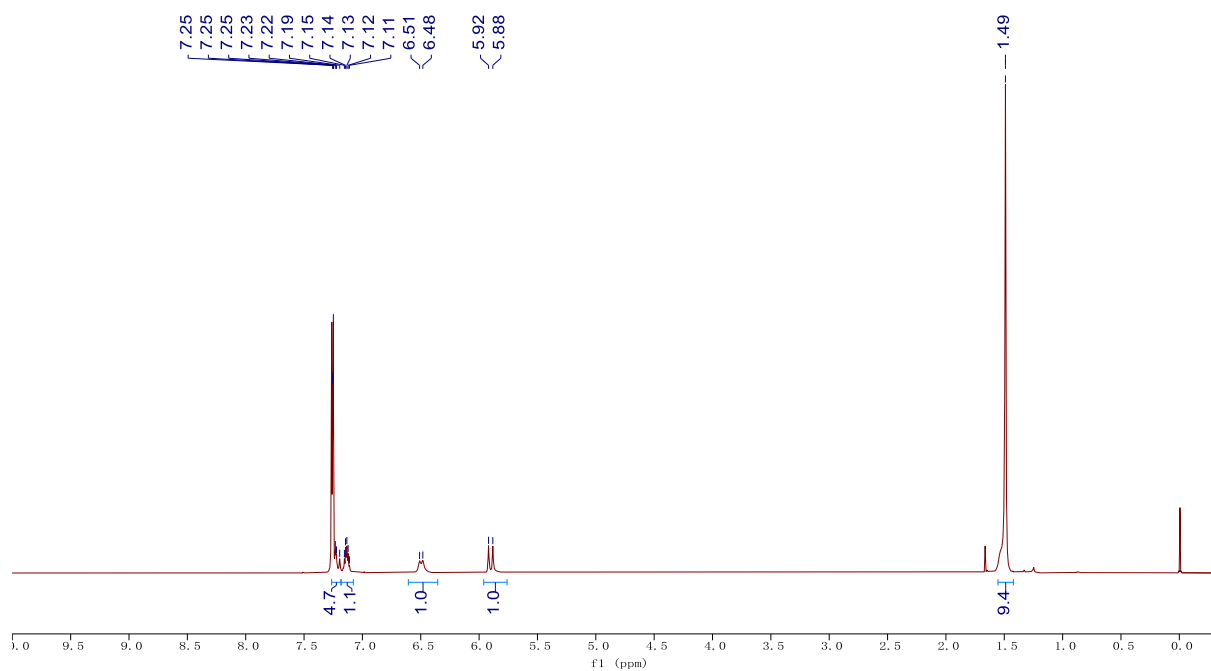

$^{13}\text{C}$  NMR of compound **1** (101 MHz in  $\text{CDCl}_3$ )

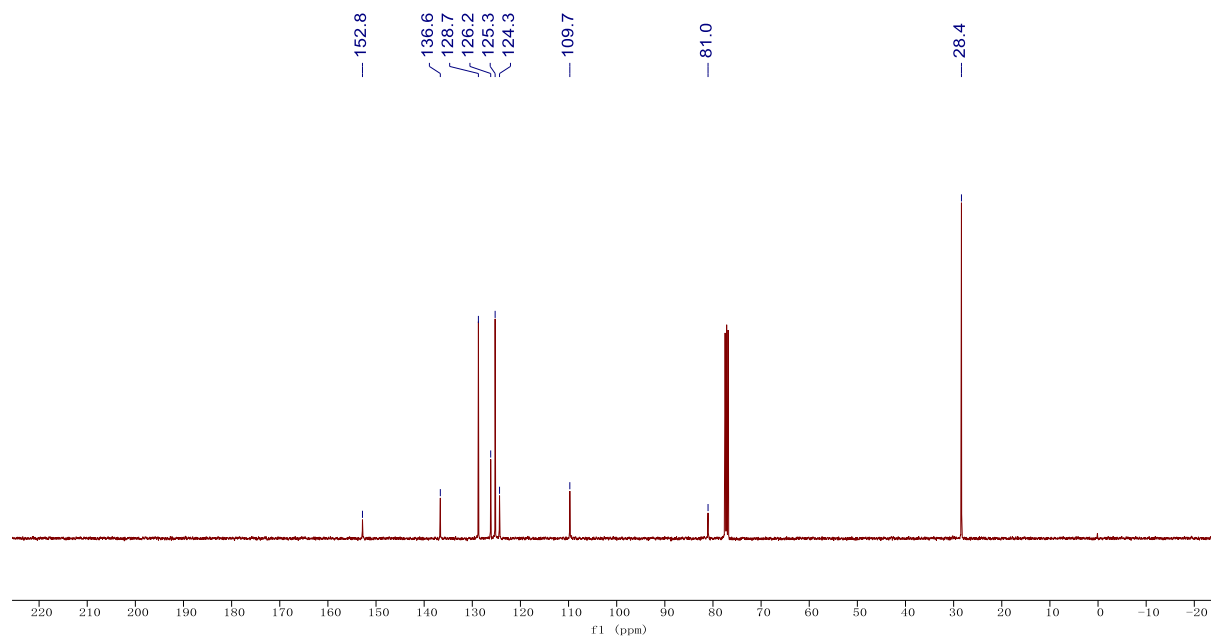

<sup>1</sup>H NMR of compound **2** (400 MHz in CDCl<sub>3</sub>)

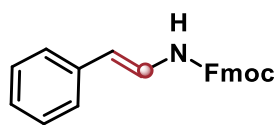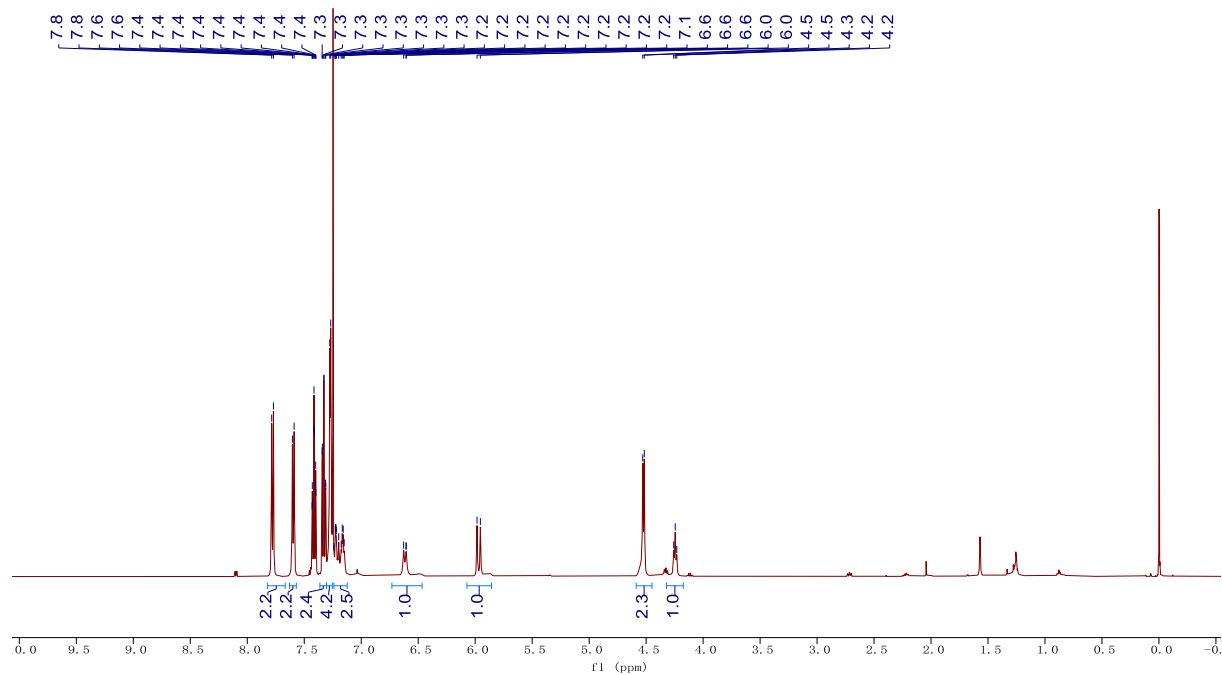

<sup>13</sup>C NMR of compound **2** (101 MHz in CDCl<sub>3</sub>)

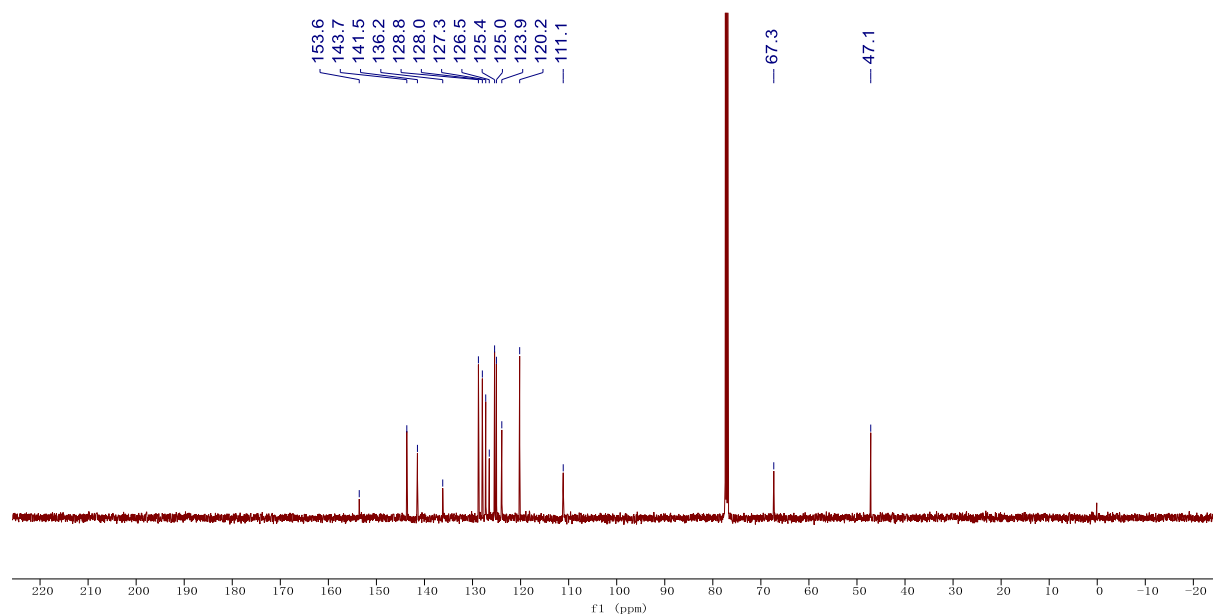

<sup>1</sup>H NMR of compound **3** (400 MHz in CDCl<sub>3</sub>)

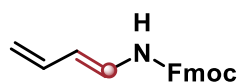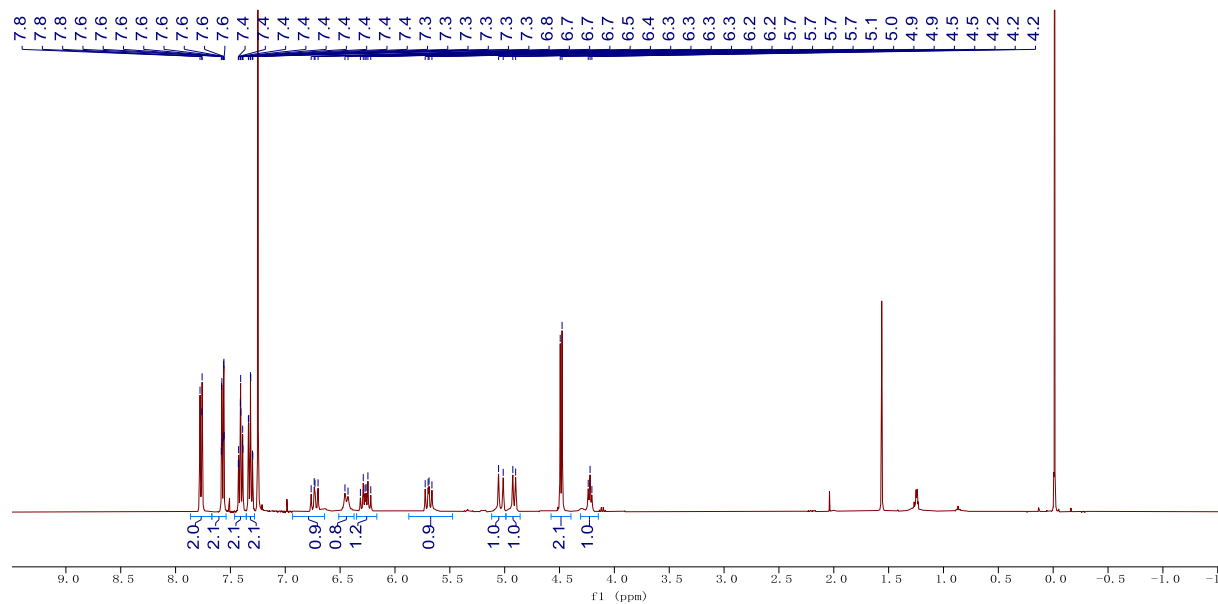

<sup>13</sup>C NMR of compound **3** (101 MHz in CDCl<sub>3</sub>)

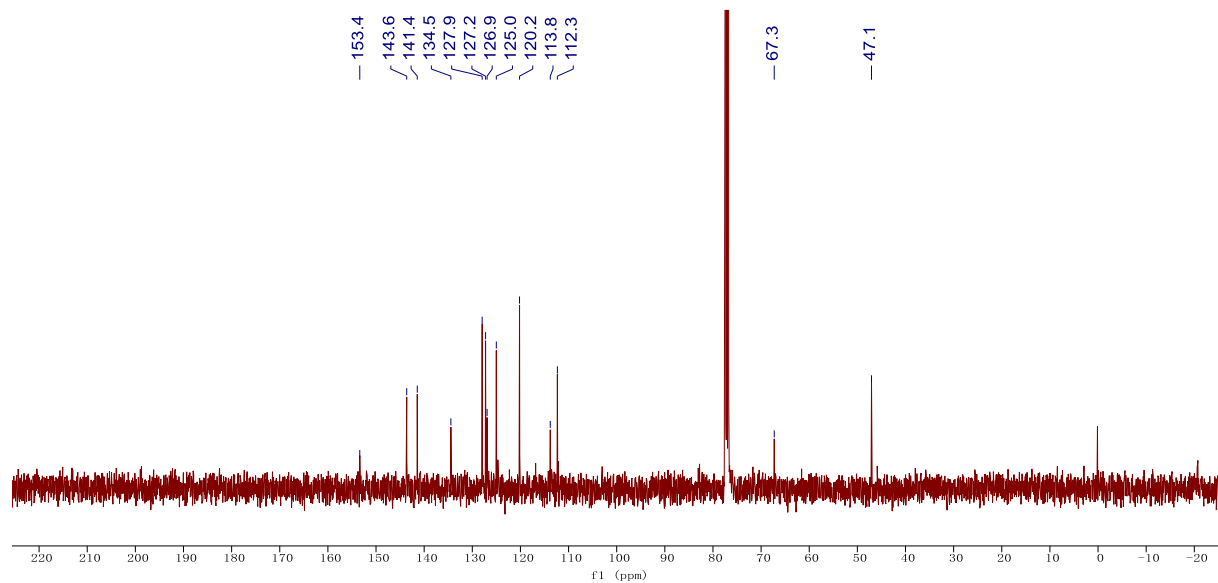



<sup>1</sup>H NMR of compound 4 (400 MHz in CDCl<sub>3</sub>)

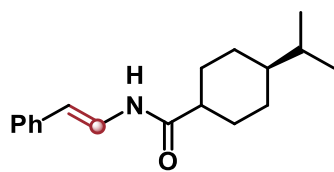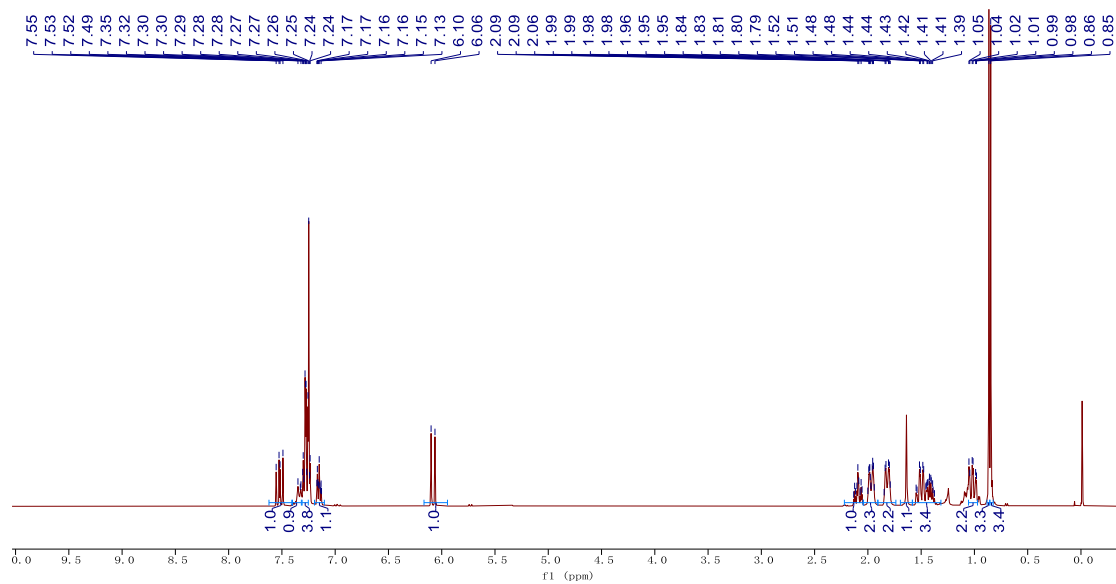

<sup>13</sup>C NMR of compound 4 (101 MHz in CDCl<sub>3</sub>)

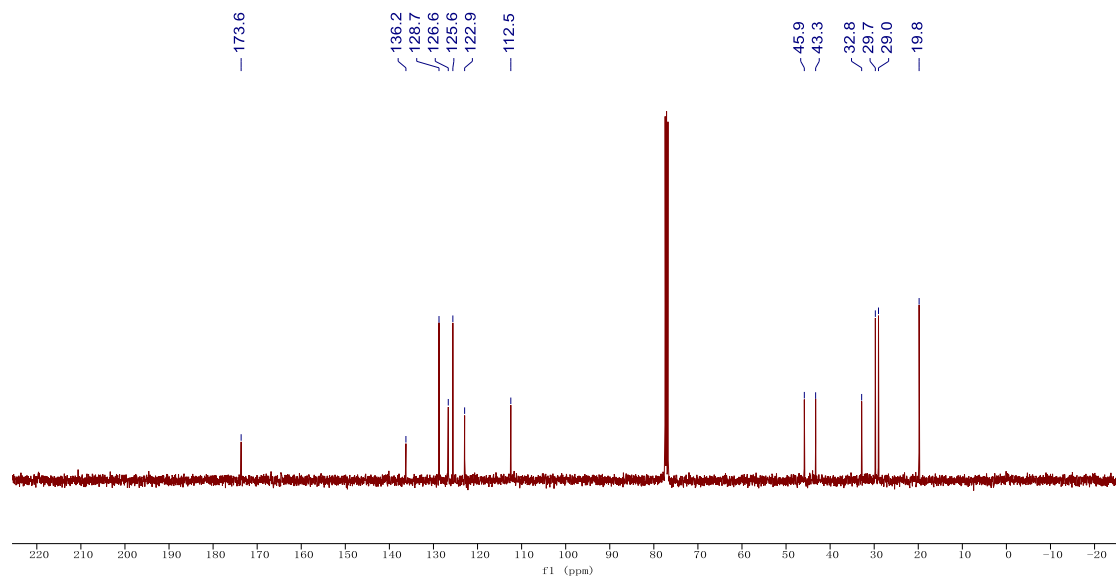

<sup>1</sup>H NMR of compound **5** (400 MHz in CDCl<sub>3</sub>)

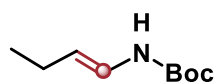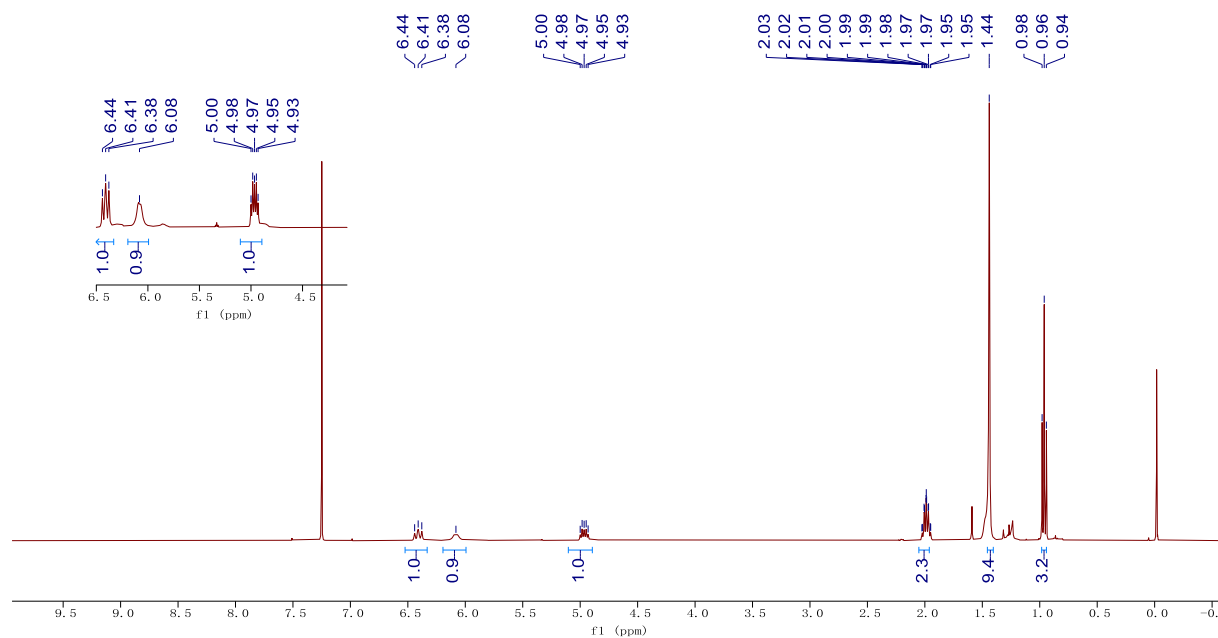

<sup>13</sup>C NMR of compound **5** (101 MHz in CDCl<sub>3</sub>)

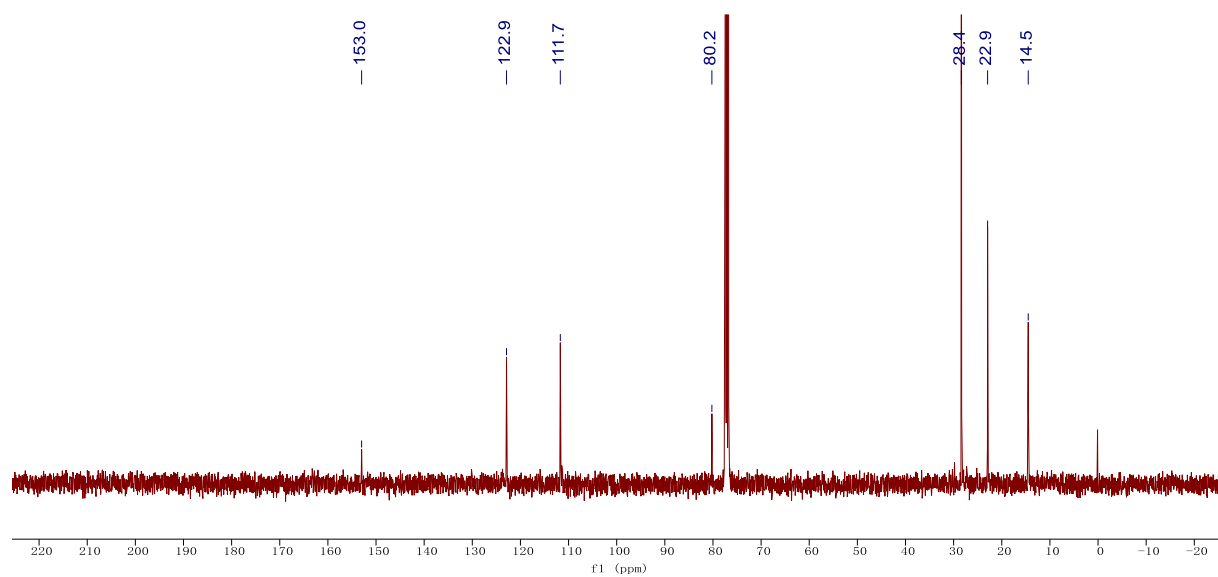

$^1\text{H}$  NMR of compound **6** (400 MHz in  $\text{CDCl}_3$ )

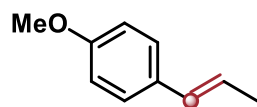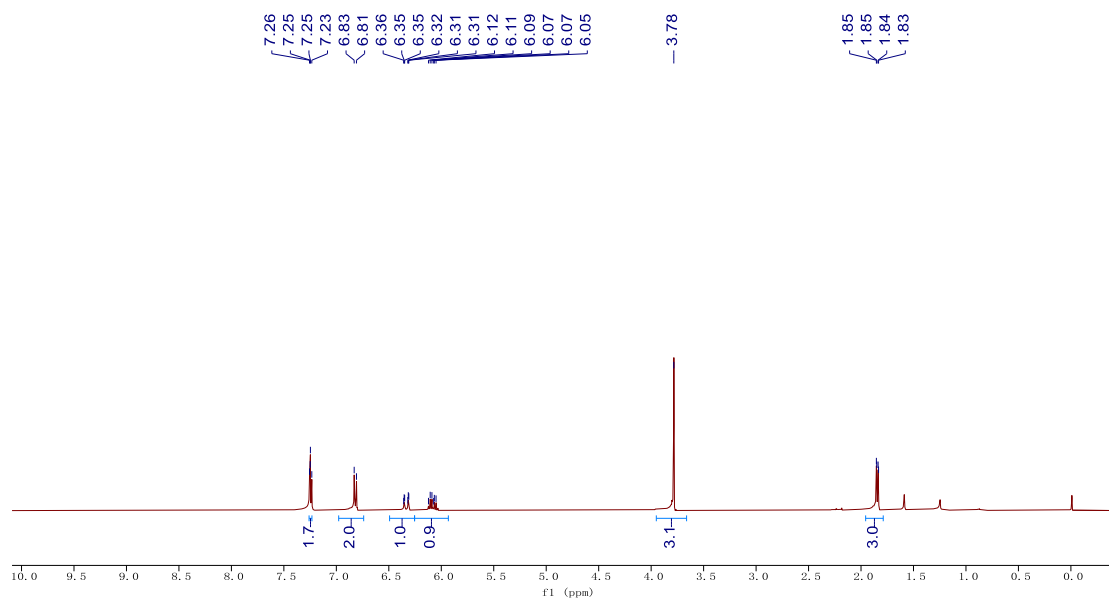

$^{13}\text{C}$  NMR of compound **6** (101 MHz in  $\text{CDCl}_3$ )

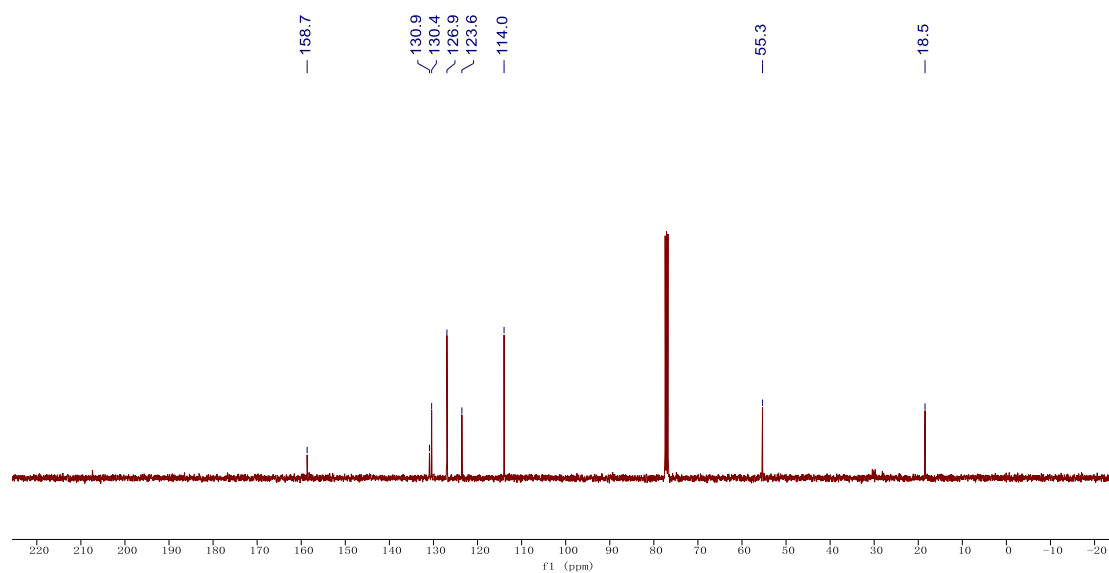

$^1\text{H}$  NMR of compound **7** (400 MHz in  $\text{CDCl}_3$ )

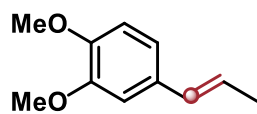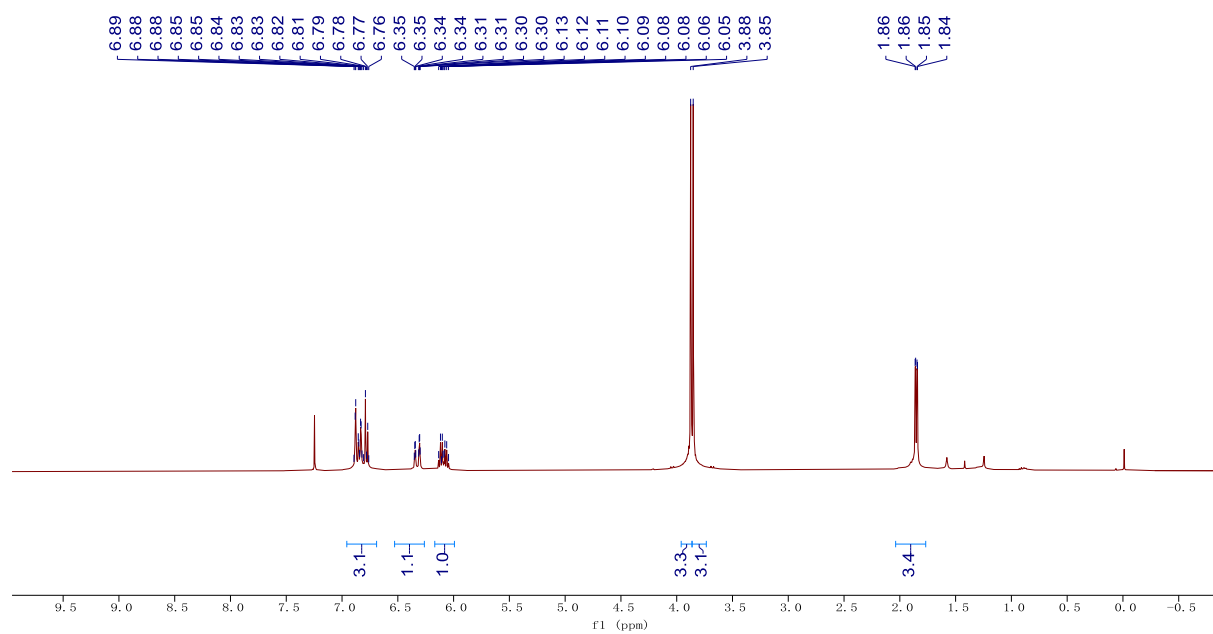

$^{13}\text{C}$  NMR of compound **7** (101 MHz in  $\text{CDCl}_3$ )

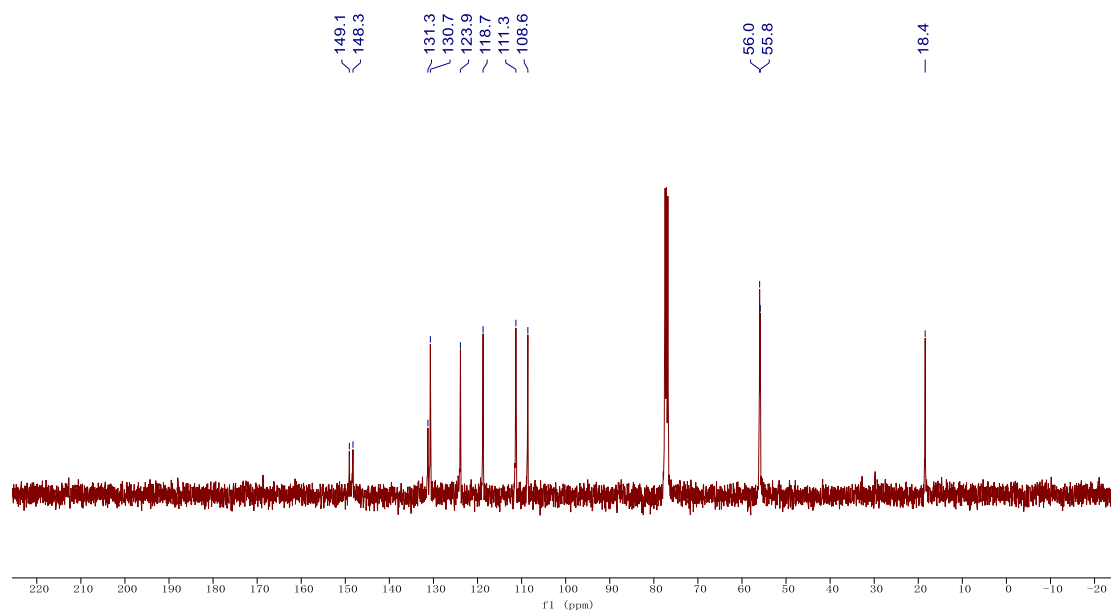

**<sup>1</sup>H NMR of compound 8 (400 MHz in CDCl<sub>3</sub>)**

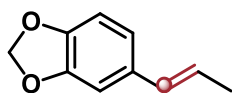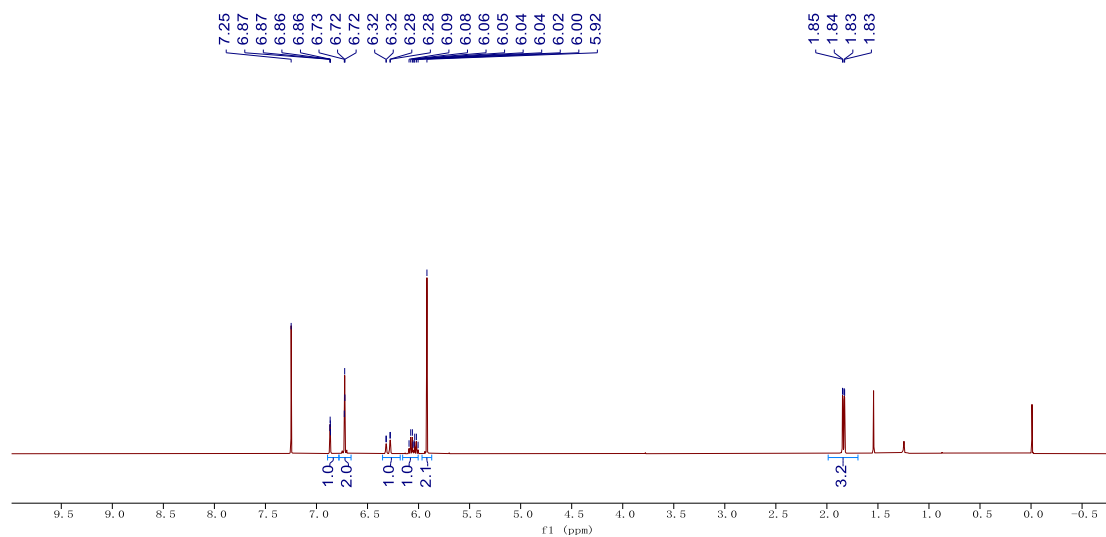

**<sup>13</sup>C NMR of compound 8 (101 MHz in CDCl<sub>3</sub>)**

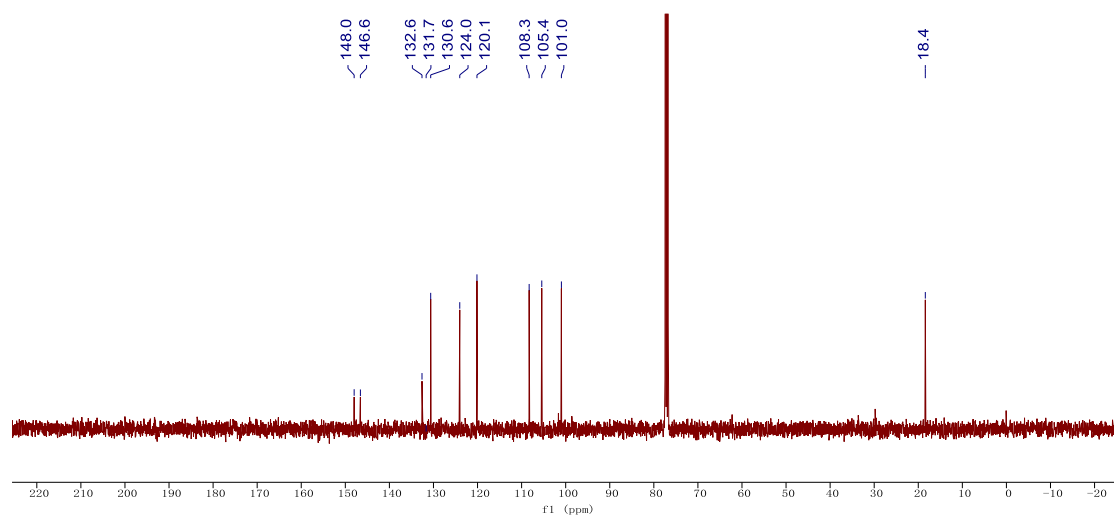

$^1\text{H}$  NMR of compound **9** (400 MHz in  $\text{CDCl}_3$ )

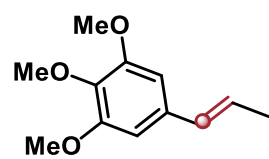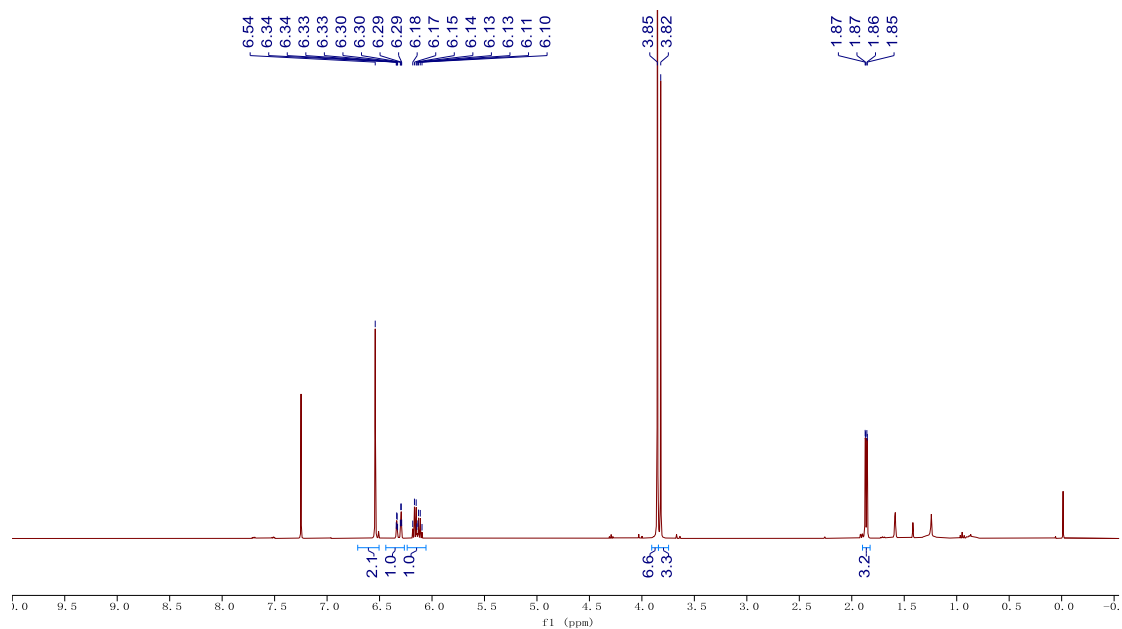

$^{13}\text{C}$  NMR of compound **9** (101 MHz in  $\text{CDCl}_3$ )

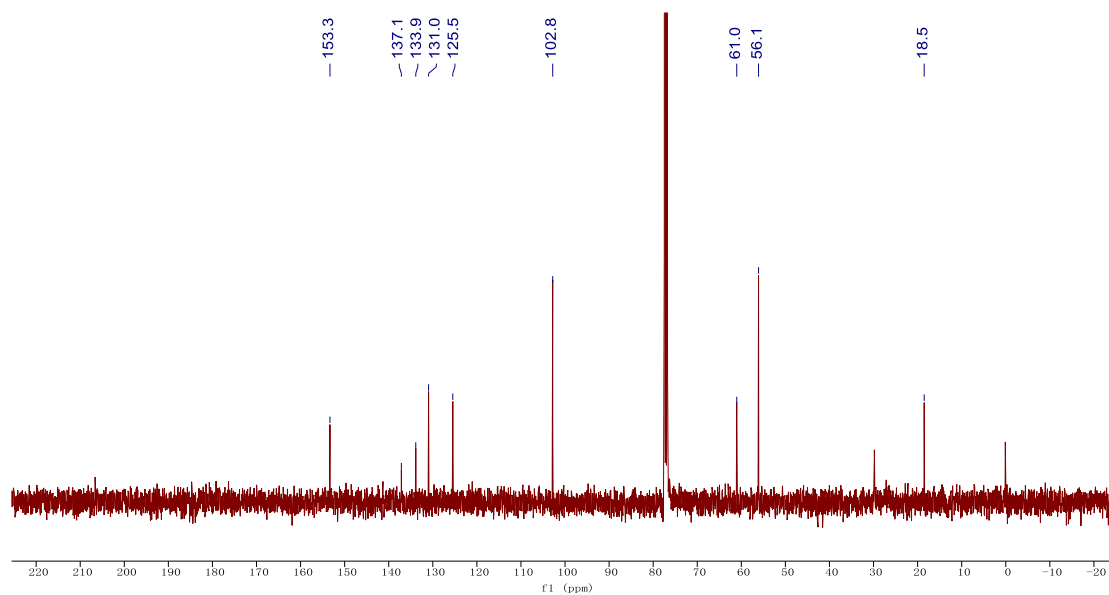

**<sup>1</sup>H NMR** of compound **10** (400 MHz in CDCl<sub>3</sub>)

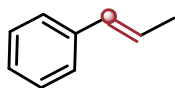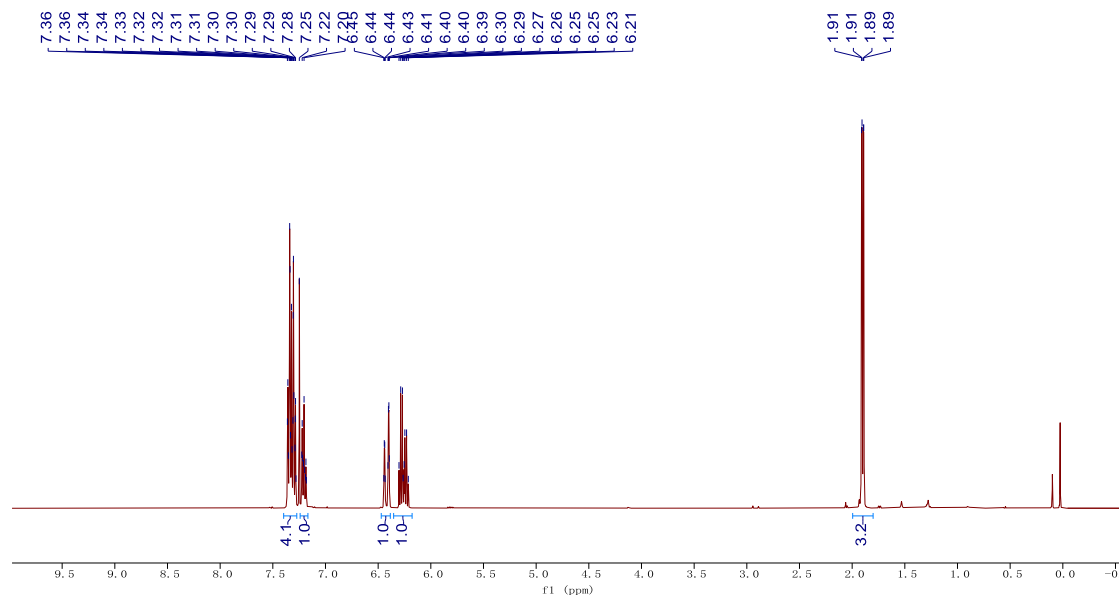

**<sup>13</sup>C NMR** of compound **10** (101 MHz in CDCl<sub>3</sub>)

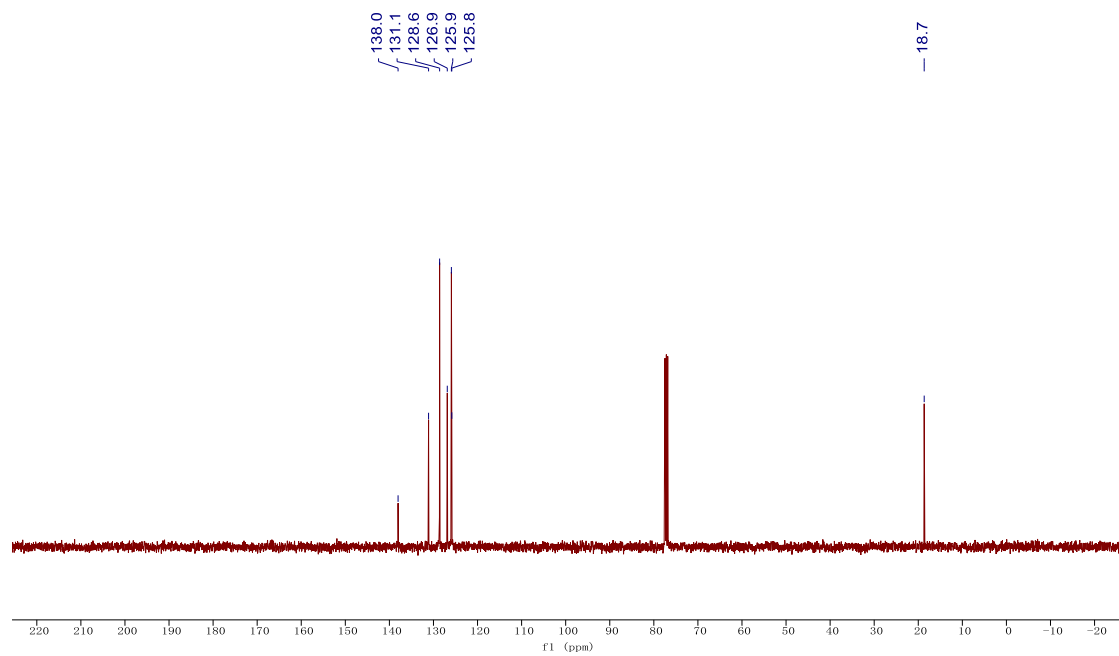

$^1\text{H}$  NMR of compound **11** (400 MHz in  $\text{CDCl}_3$ )

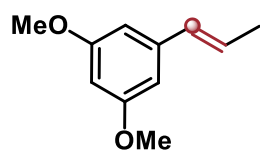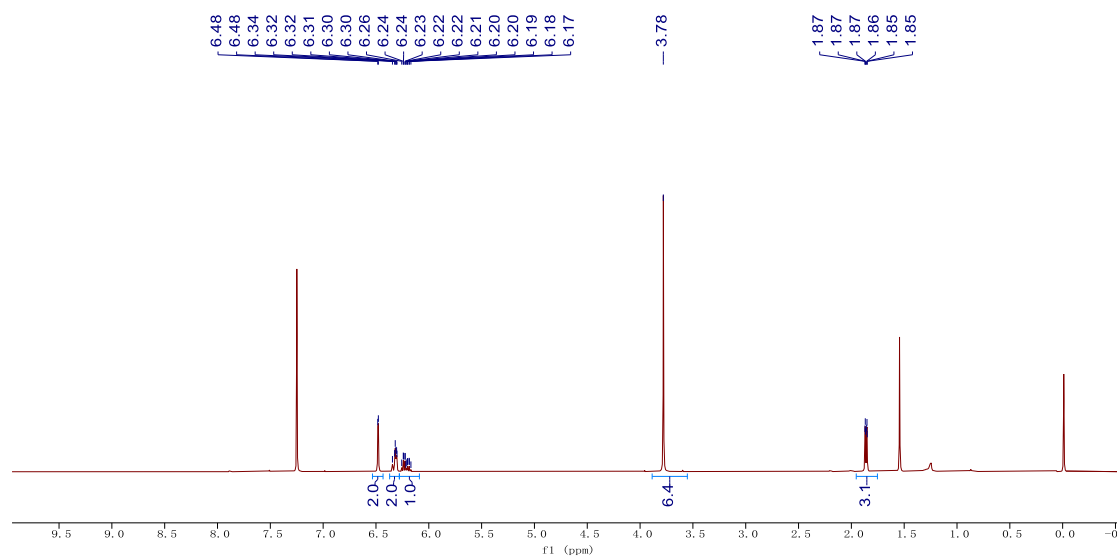

$^{13}\text{C}$  NMR of compound **11** (101 MHz in  $\text{CDCl}_3$ )

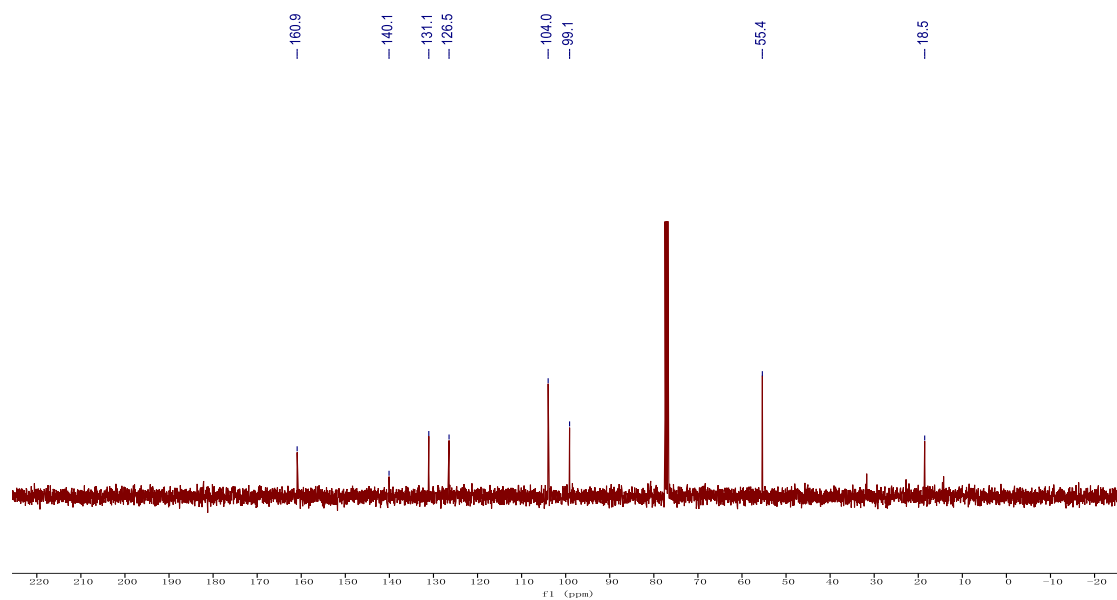



**<sup>1</sup>H NMR** of compound **12** (400 MHz in CDCl<sub>3</sub>)

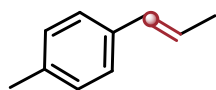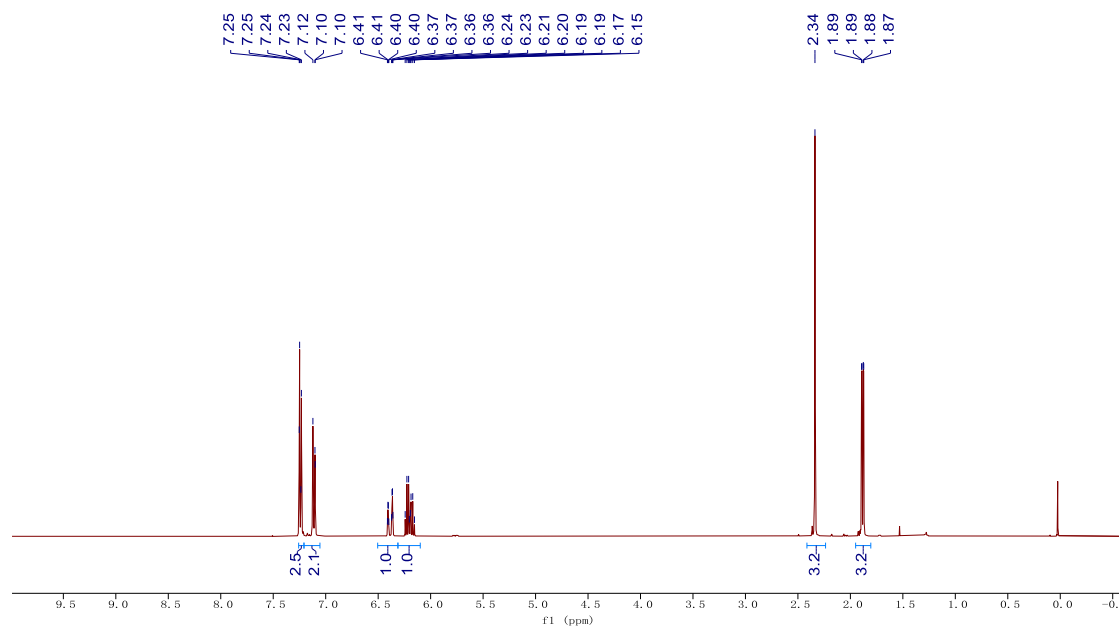

**<sup>13</sup>C NMR** of compound **12** (101 MHz in CDCl<sub>3</sub>)

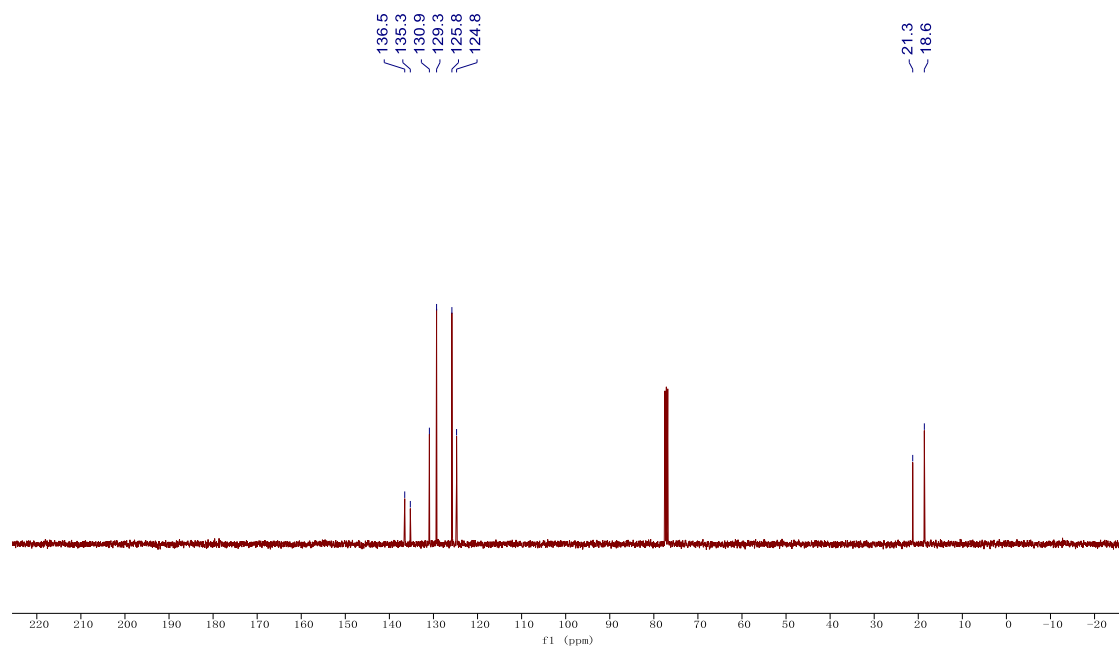

$^1\text{H}$  NMR of compound **13** (400 MHz in  $\text{CDCl}_3$ )

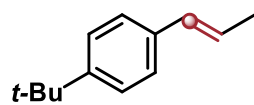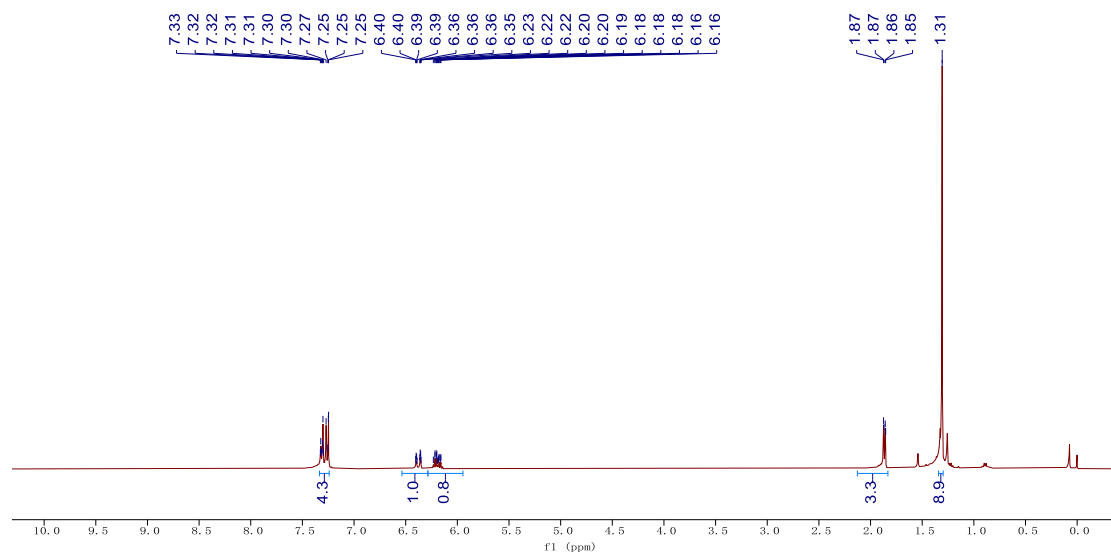

$^{13}\text{C}$  NMR of compound **13** (101 MHz in  $\text{CDCl}_3$ )

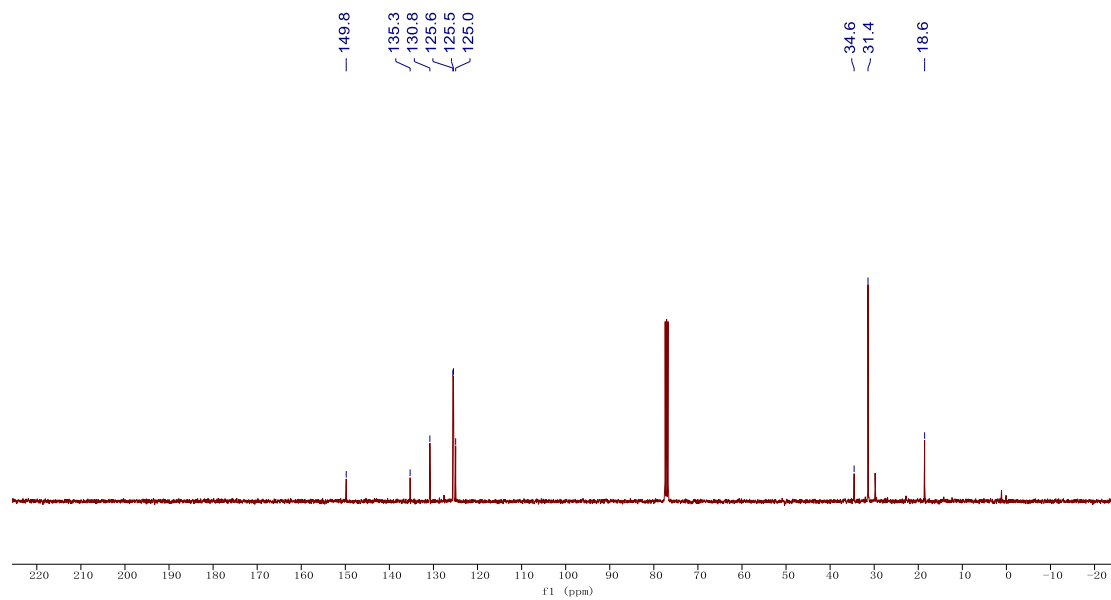

$^1\text{H}$  NMR of compound **14** (400 MHz in  $\text{CDCl}_3$ )

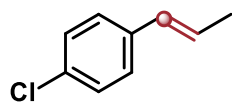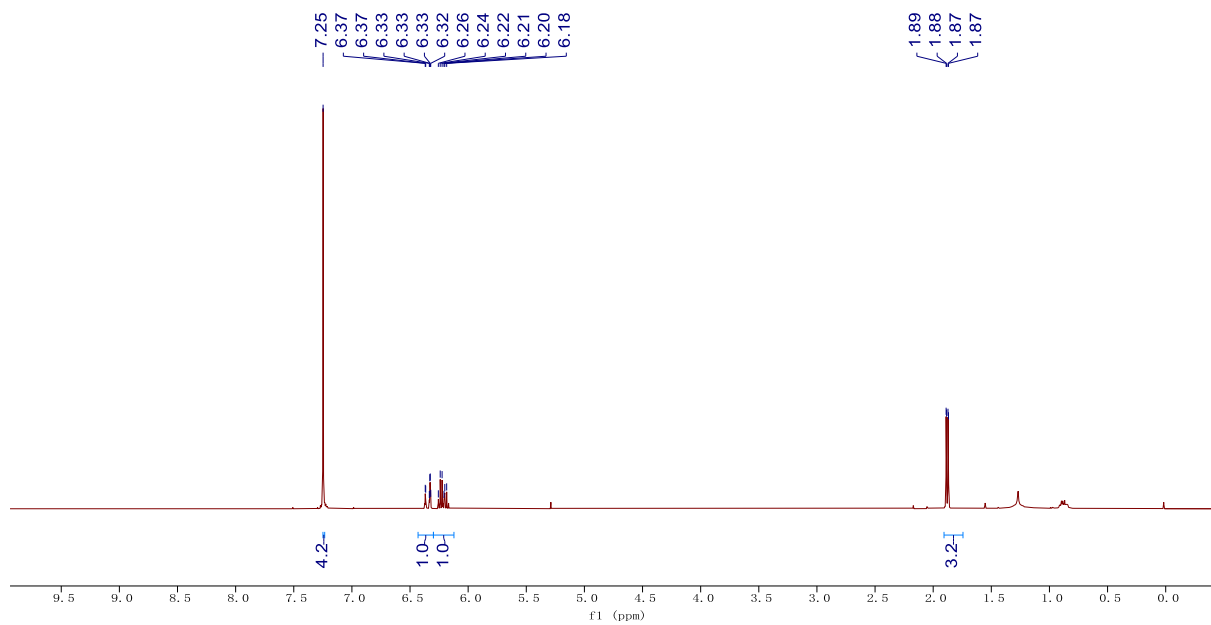

$^{13}\text{C}$  NMR of compound **14** (101 MHz in  $\text{CDCl}_3$ )

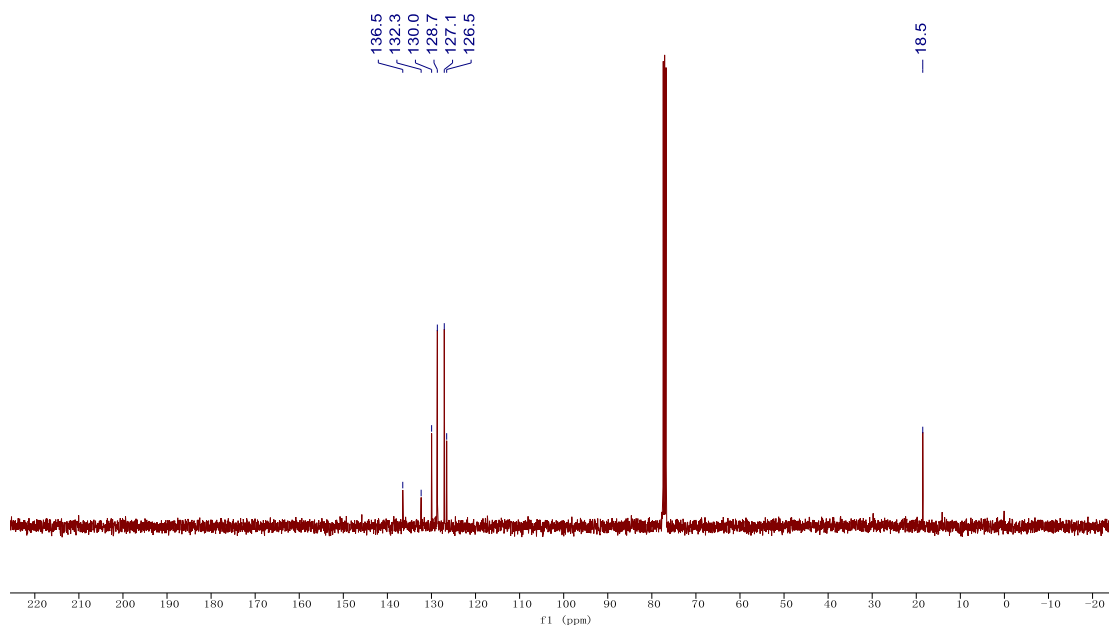

$^1\text{H}$  NMR of compound **15** (400 MHz in  $\text{CDCl}_3$ )

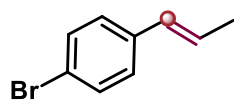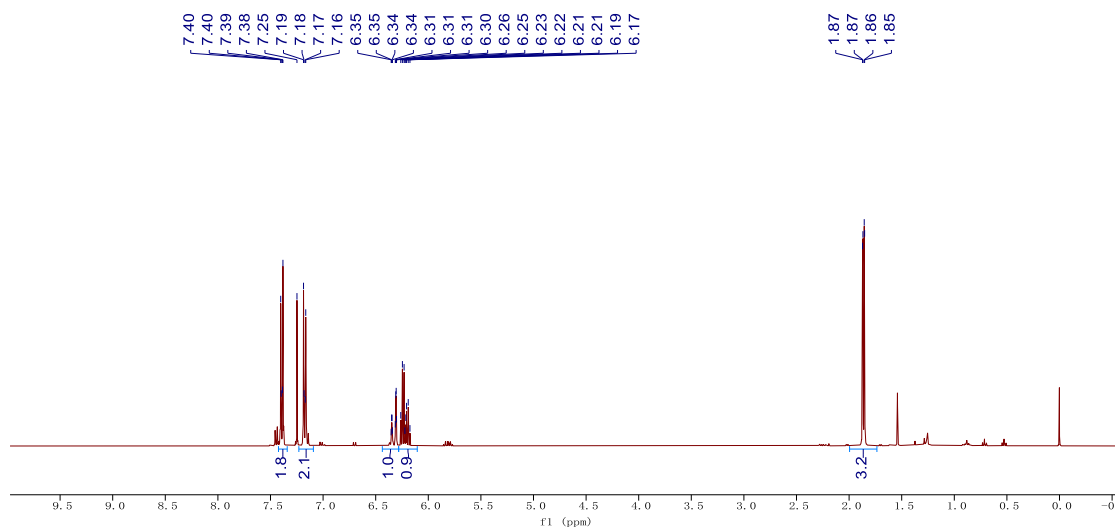

$^{13}\text{C}$  NMR of compound **15** (101 MHz in  $\text{CDCl}_3$ )

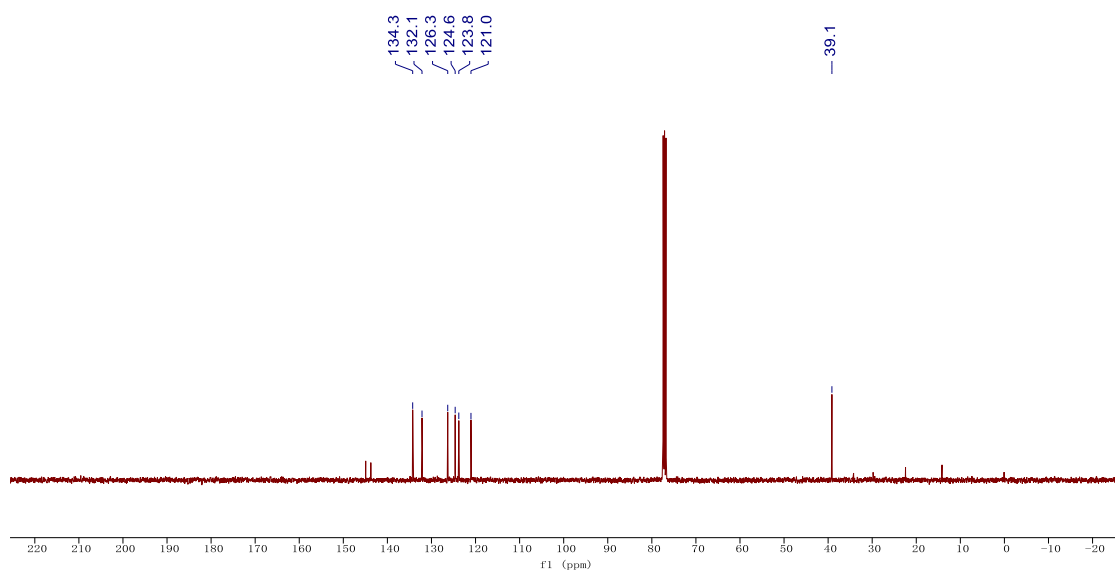

**<sup>1</sup>H NMR** of compound **16** (400 MHz in CDCl<sub>3</sub>)

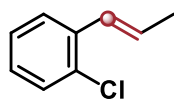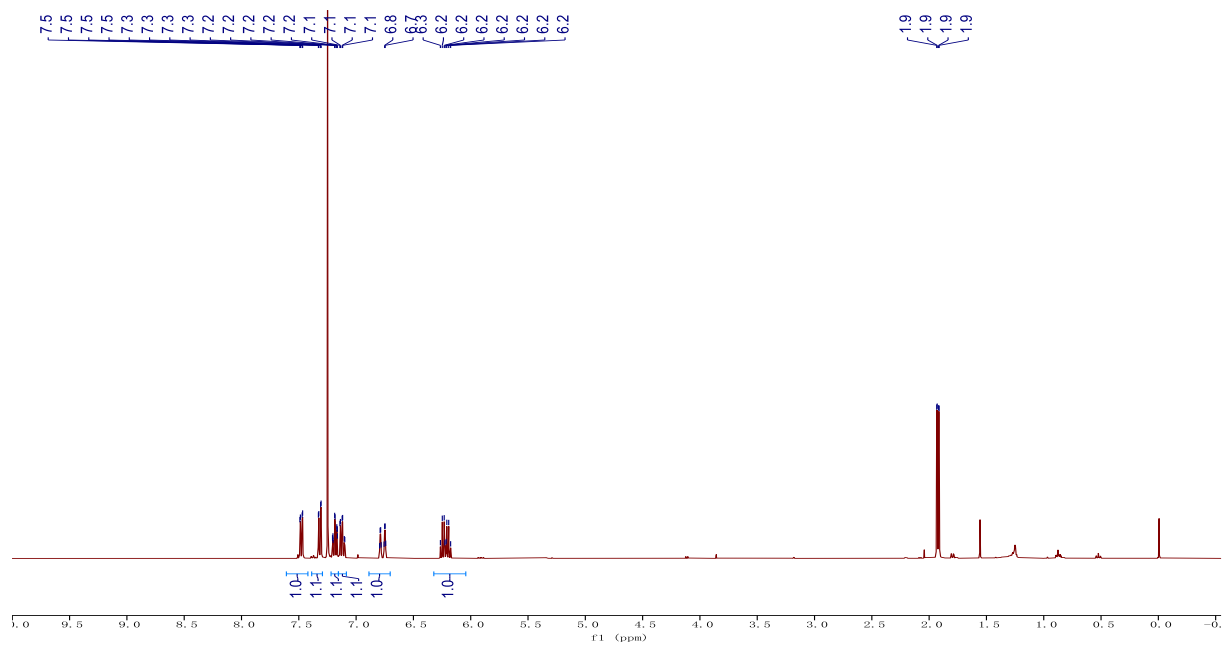

**<sup>13</sup>C NMR** of compound **16** (101 MHz in CDCl<sub>3</sub>)

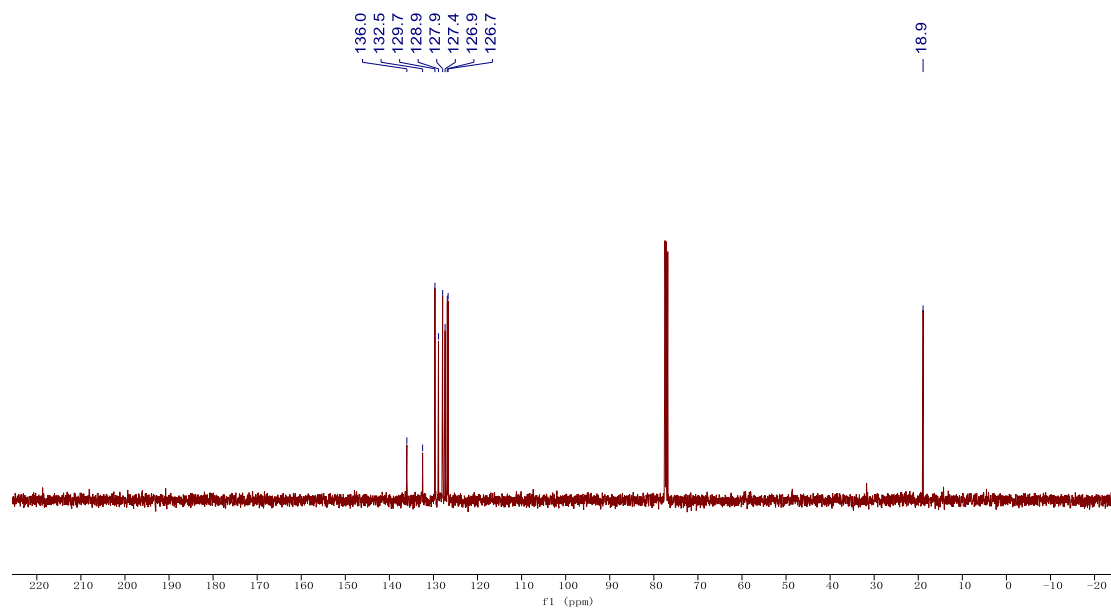

<sup>1</sup>H NMR of compound **17** (400 MHz in CDCl<sub>3</sub>)

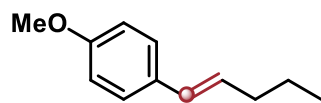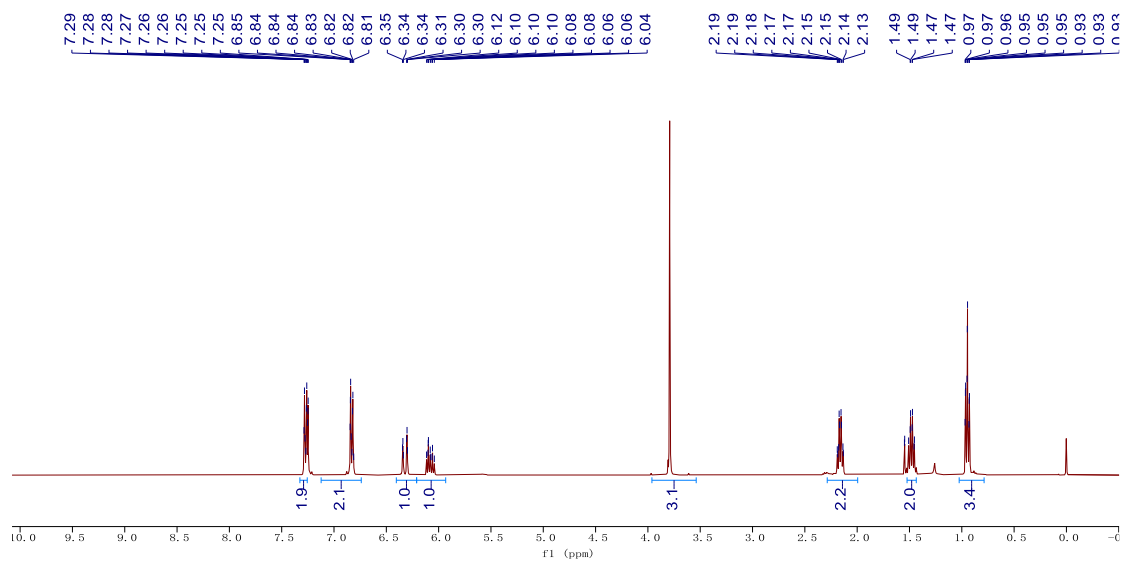

<sup>13</sup>C NMR of compound **17** (101 MHz in CDCl<sub>3</sub>)

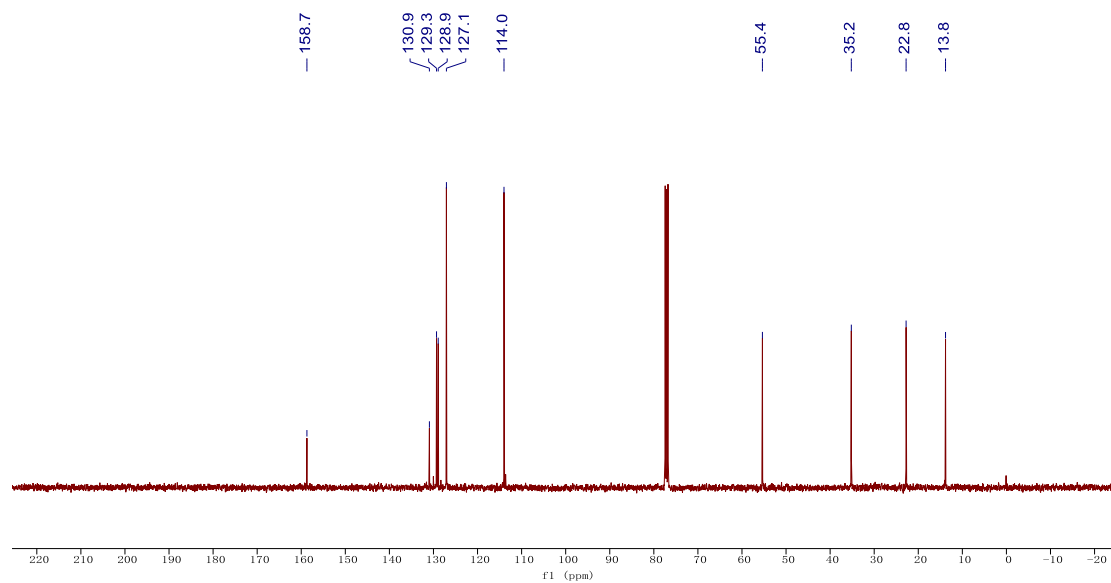

**<sup>1</sup>H NMR of compound 18 (400 MHz in CDCl<sub>3</sub>)**

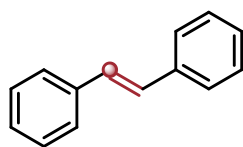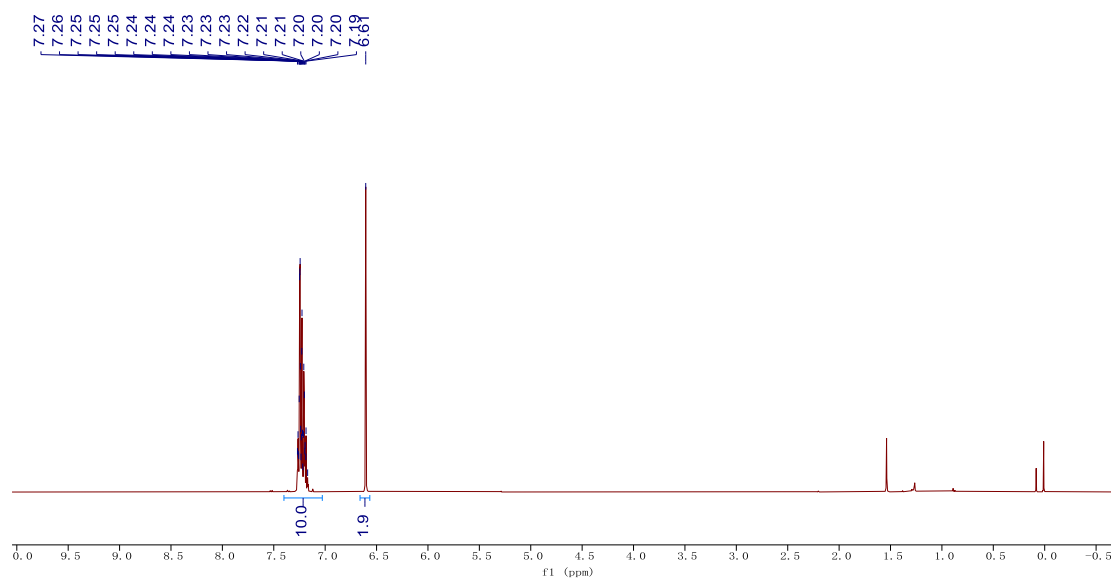

**<sup>13</sup>C NMR of compound 18 (101 MHz in CDCl<sub>3</sub>)**

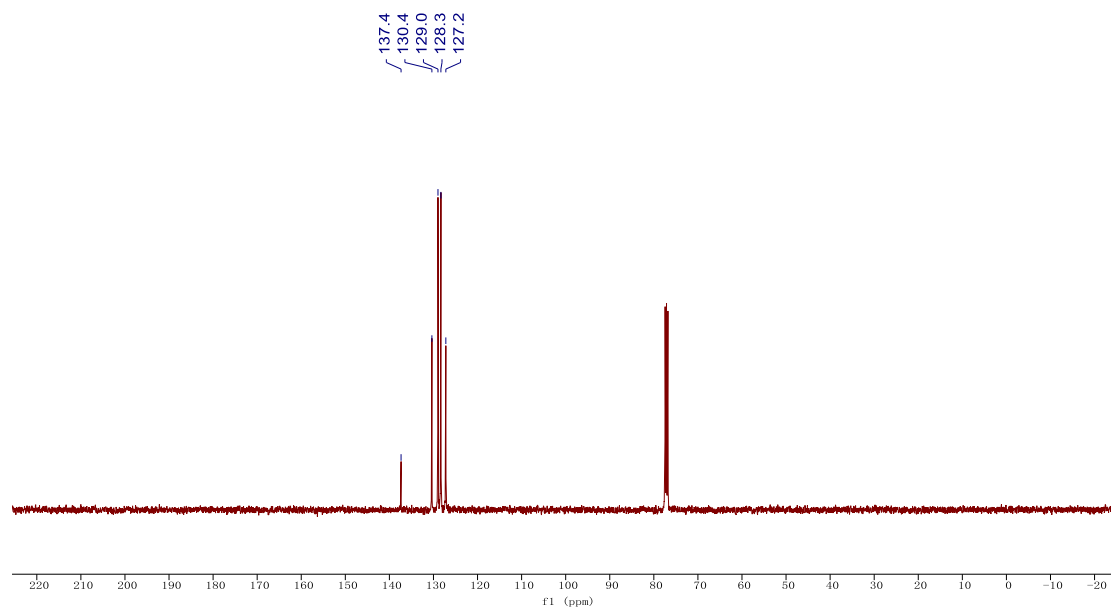

$^1\text{H}$  NMR of compound **19** (400 MHz in  $\text{CDCl}_3$ )

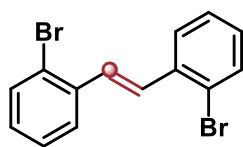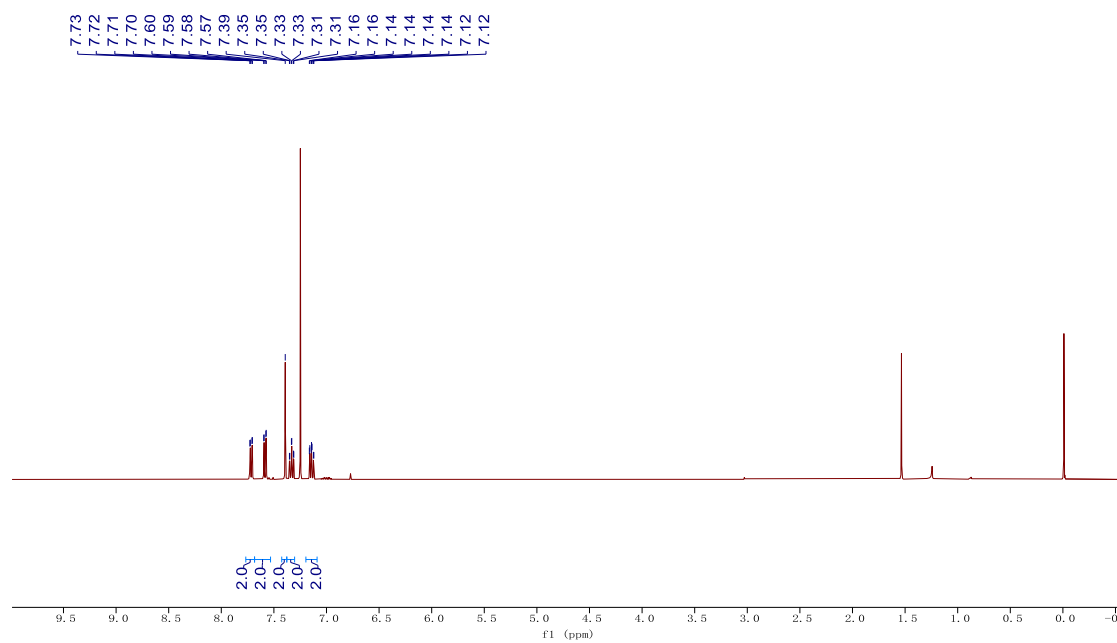

$^{13}\text{C}$  NMR of compound **19** (101 MHz in  $\text{CDCl}_3$ )

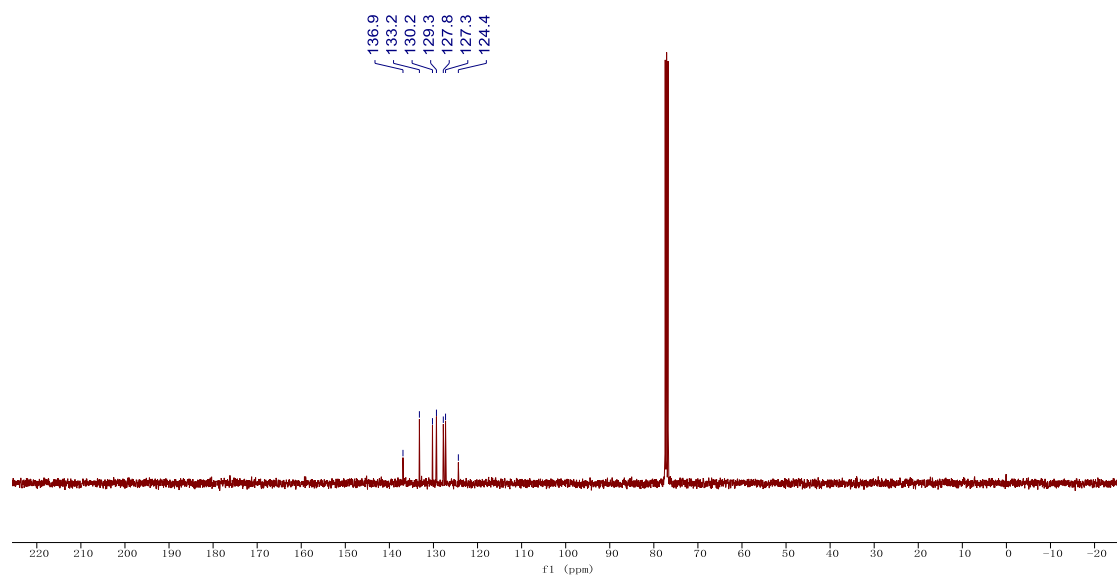



$^1\text{H}$  NMR of compound **20** (400 MHz in  $\text{CDCl}_3$ )

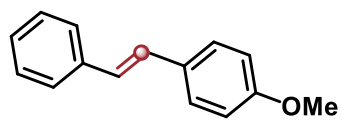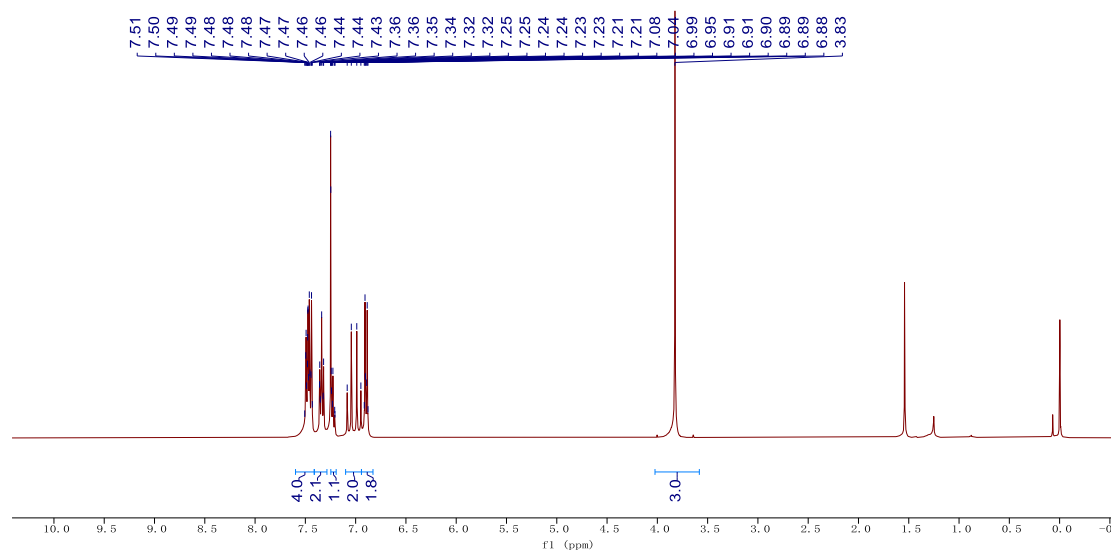

$^{13}\text{C}$  NMR of compound **20** (101 MHz in  $\text{CDCl}_3$ )

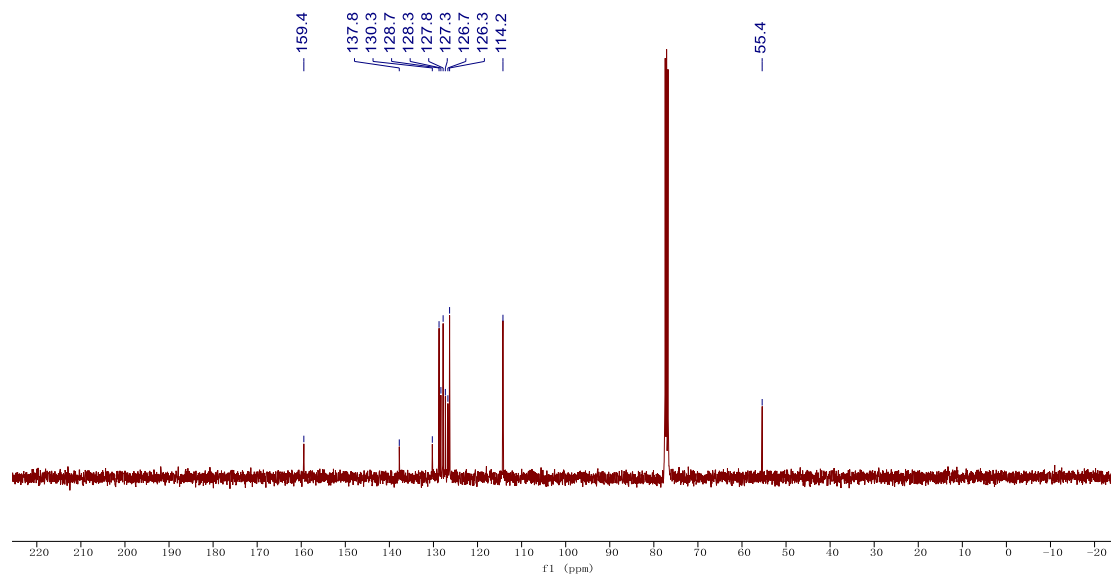

$^1\text{H}$  NMR of compound **21** (400 MHz in  $\text{CDCl}_3$ )

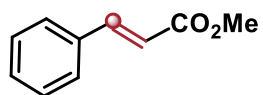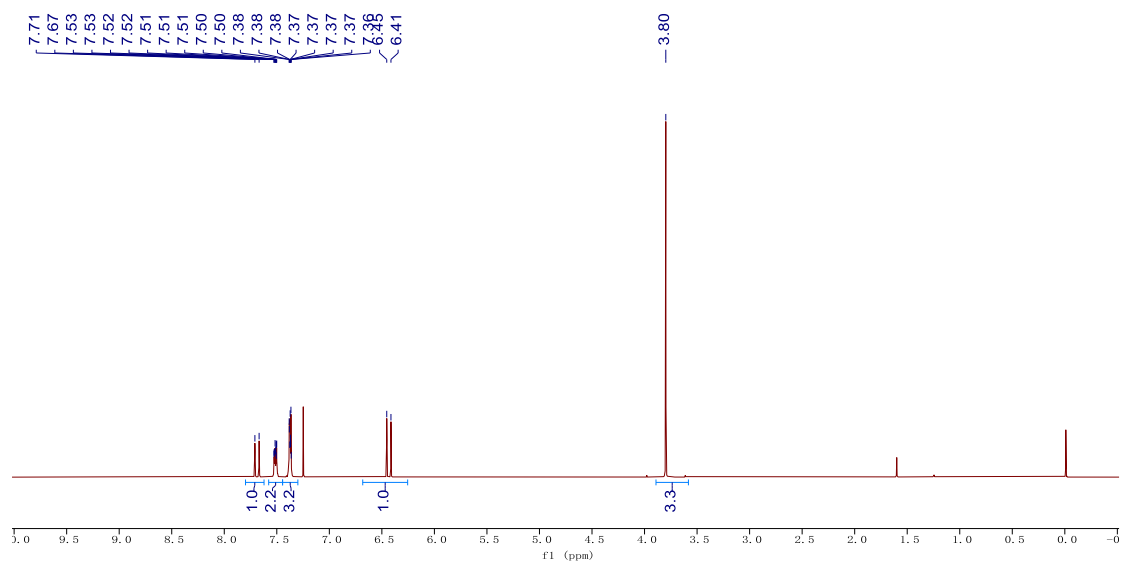

$^{13}\text{C}$  NMR of compound **21** (101 MHz in  $\text{CDCl}_3$ )

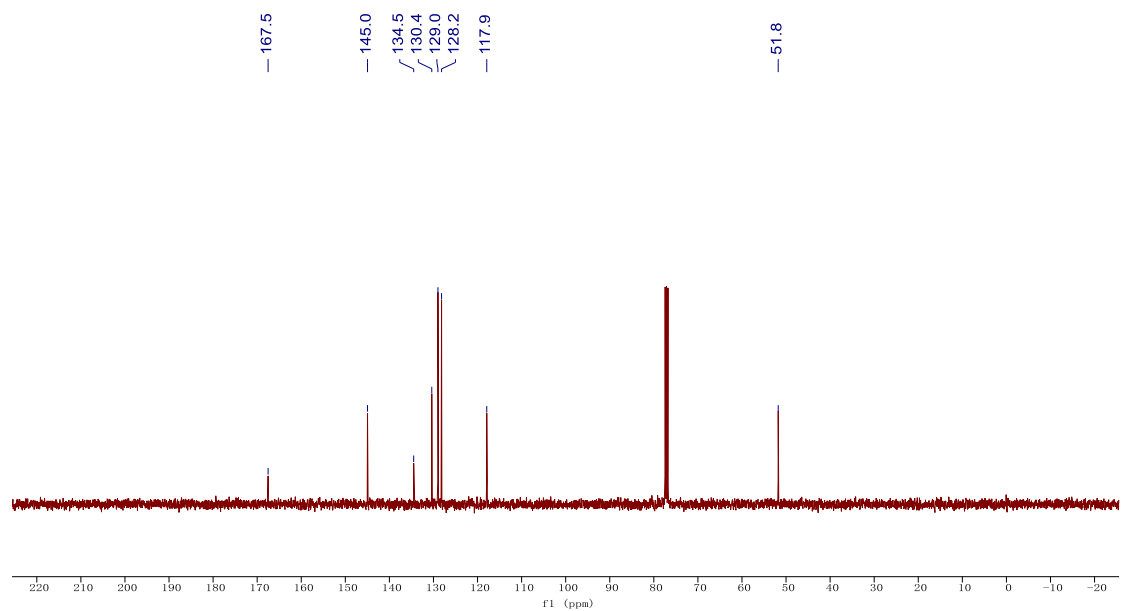

**<sup>1</sup>H NMR** of compound **22** (400 MHz in CDCl<sub>3</sub>)

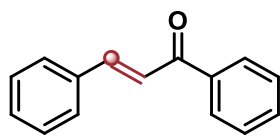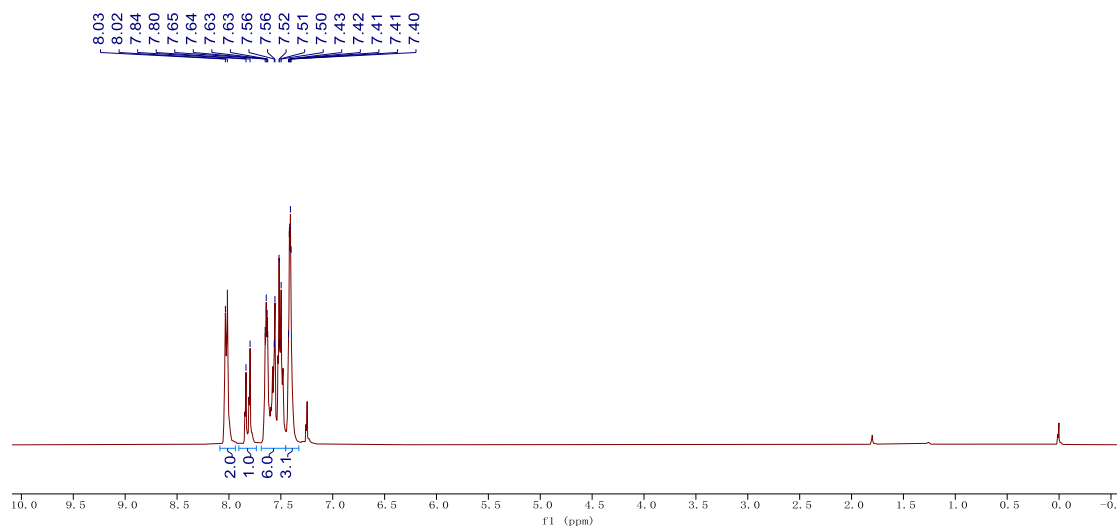

**<sup>13</sup>C NMR** of compound **22** (101 MHz in CDCl<sub>3</sub>)

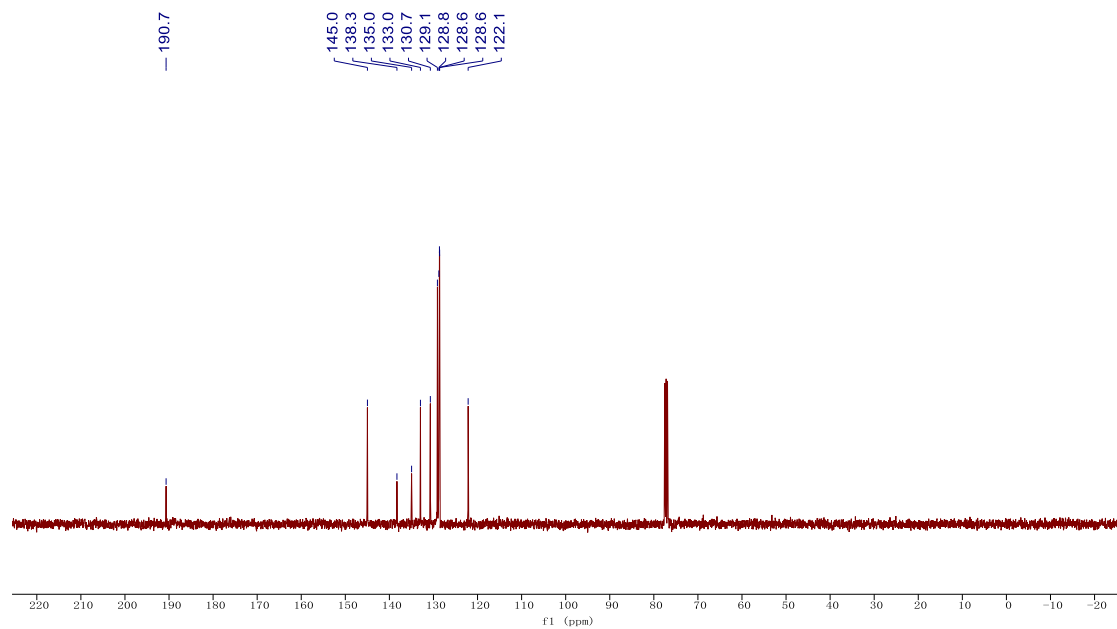

**<sup>1</sup>H NMR** of compound **23** (400 MHz in CDCl<sub>3</sub>)

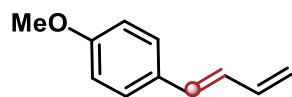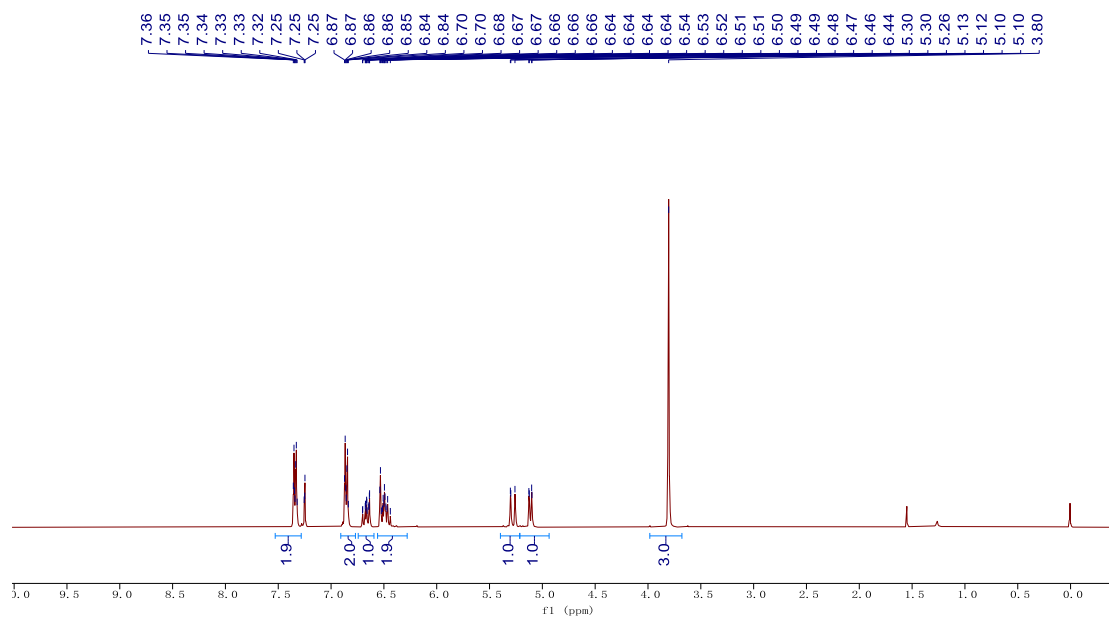

**<sup>13</sup>C NMR** of compound **23** (101 MHz in CDCl<sub>3</sub>)

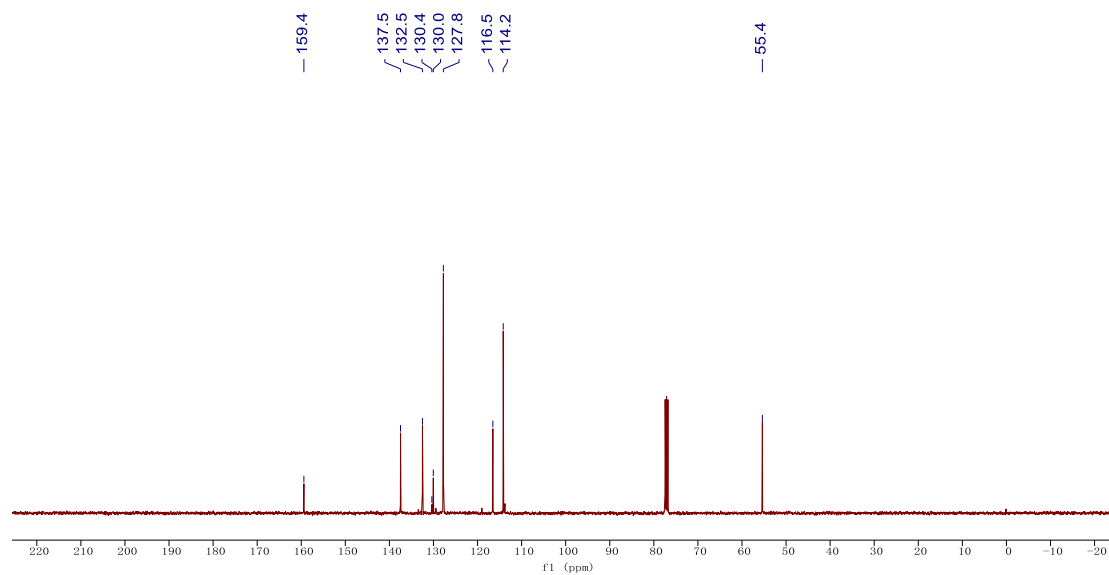

**<sup>1</sup>H NMR** of compound **24** (400 MHz in CDCl<sub>3</sub>)

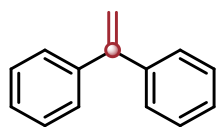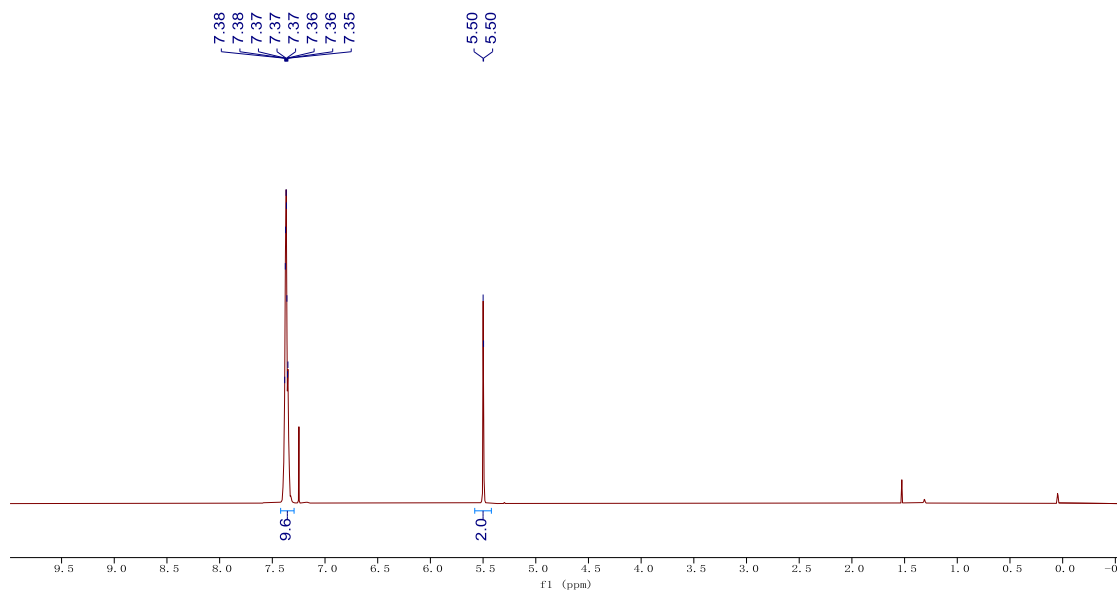

**<sup>13</sup>C NMR** of compound **24** (101 MHz in CDCl<sub>3</sub>)

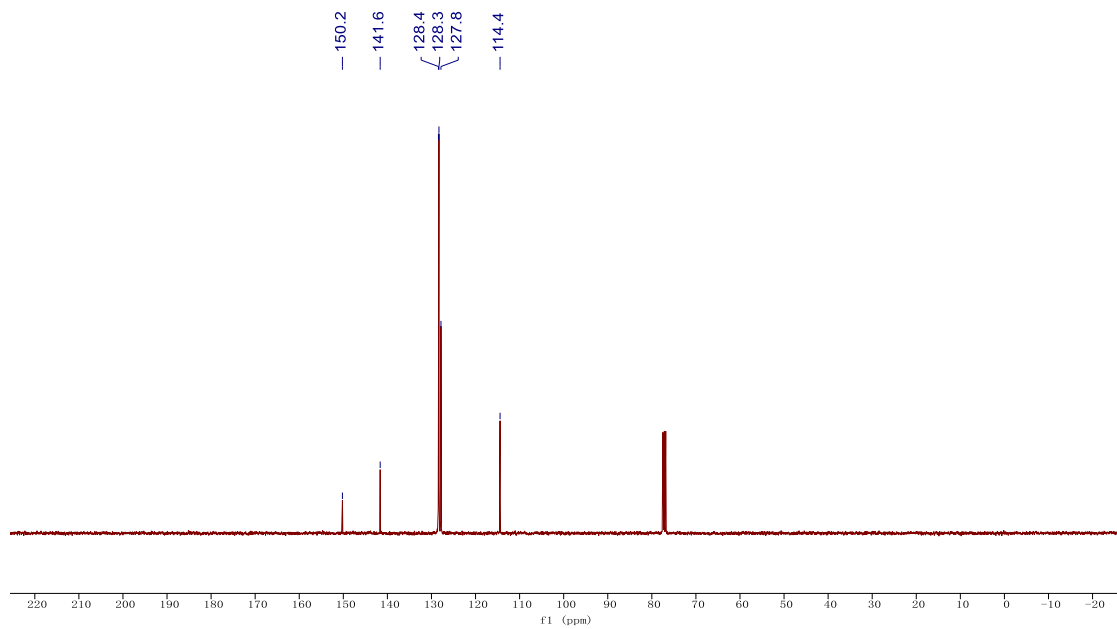

**<sup>1</sup>H NMR** of compound **25** (400 MHz in CDCl<sub>3</sub>)

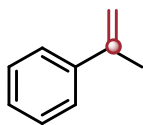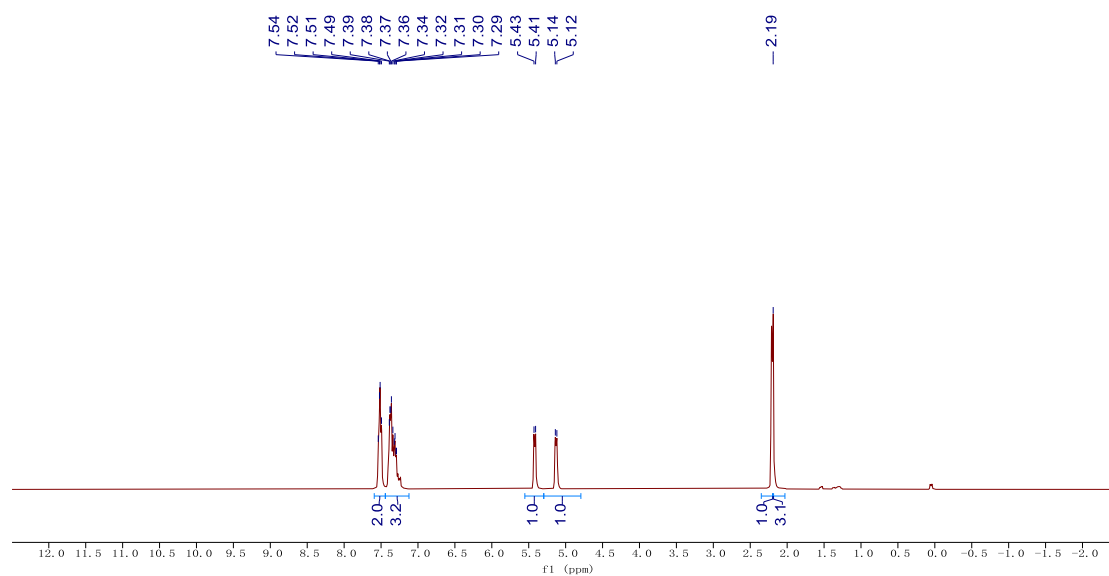

**<sup>13</sup>C NMR** of compound **25** (101 MHz in CDCl<sub>3</sub>)

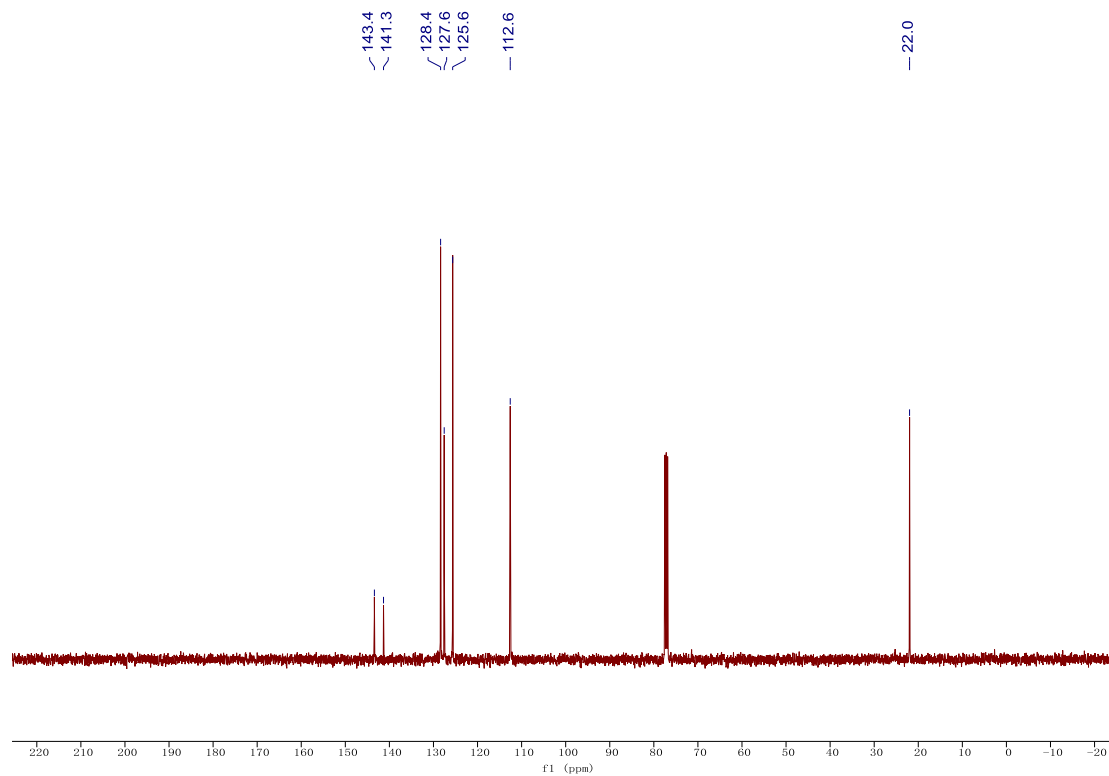

$^1\text{H}$  NMR of compound **26** (400 MHz in  $\text{CDCl}_3$ )

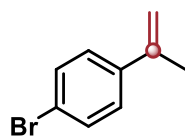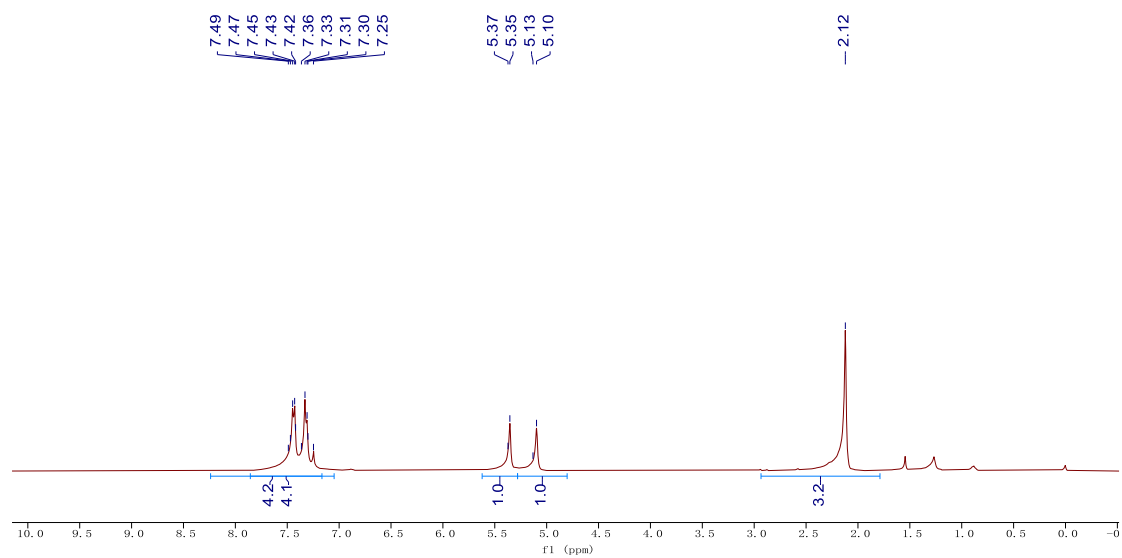

$^{13}\text{C}$  NMR of compound **26** (101 MHz in  $\text{CDCl}_3$ )

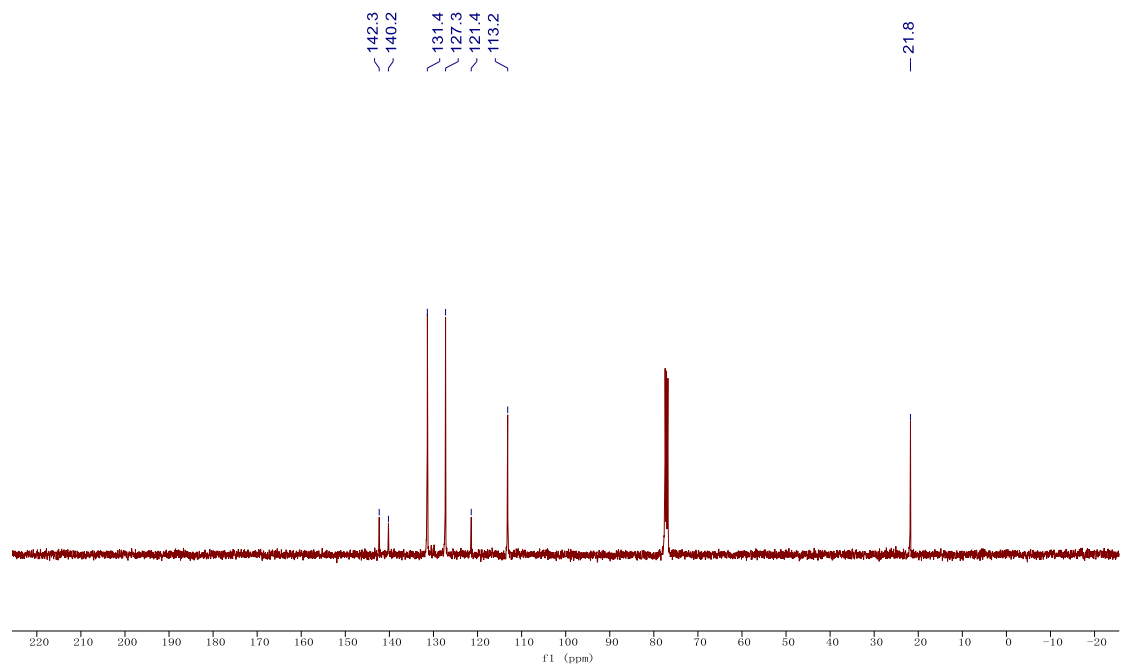

$^1\text{H}$  NMR of compound **27** (400 MHz in  $\text{CDCl}_3$ )

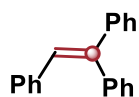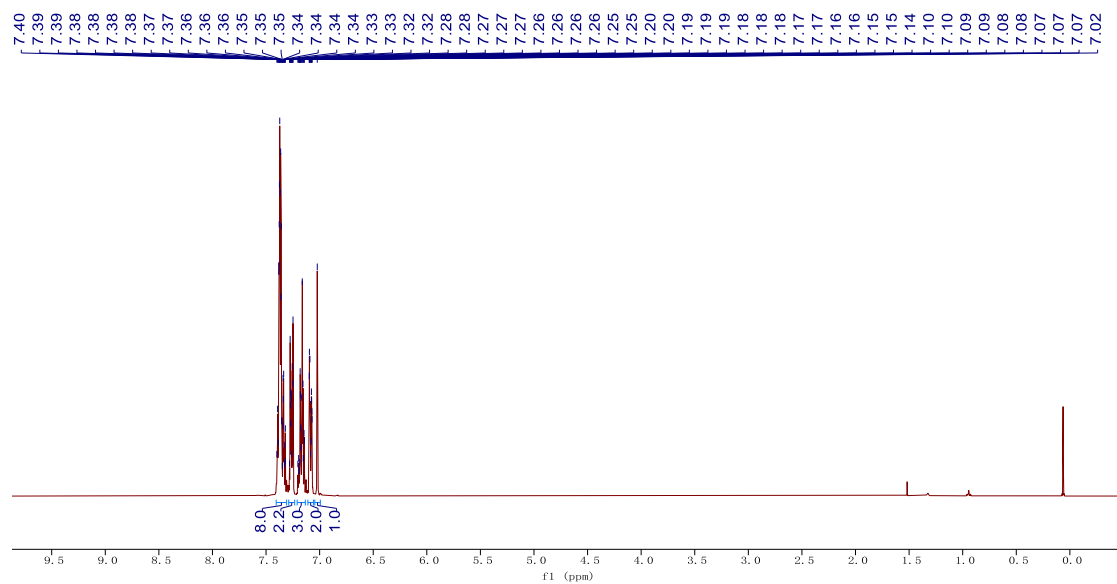

$^{13}\text{C}$  NMR of compound **27** (101 MHz in  $\text{CDCl}_3$ )

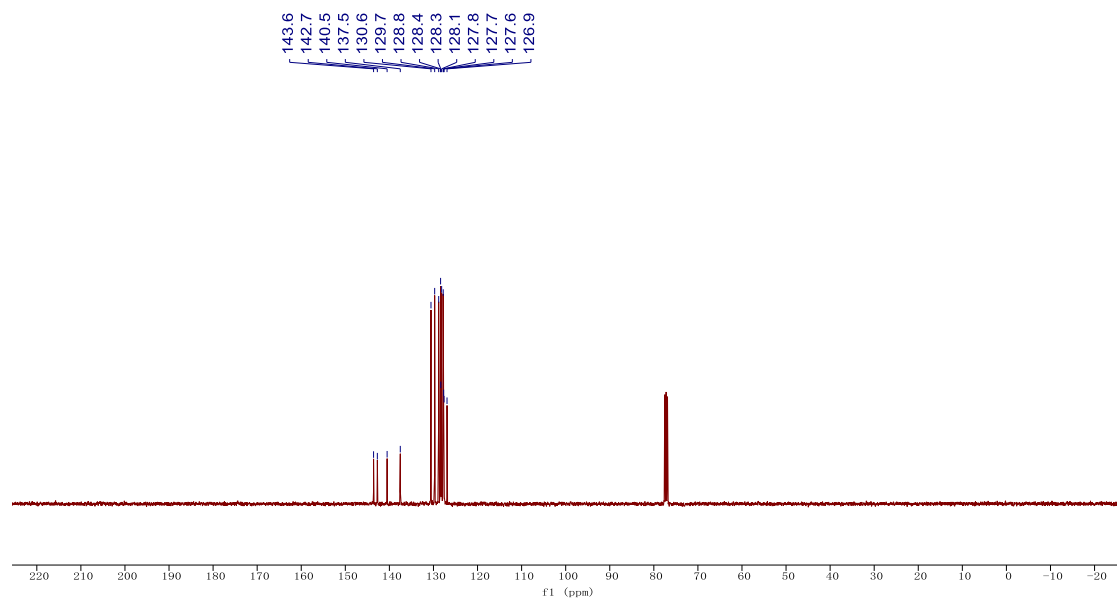



**<sup>1</sup>H NMR** of compound **28** (400 MHz in CDCl<sub>3</sub>)

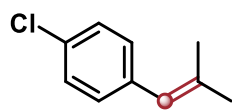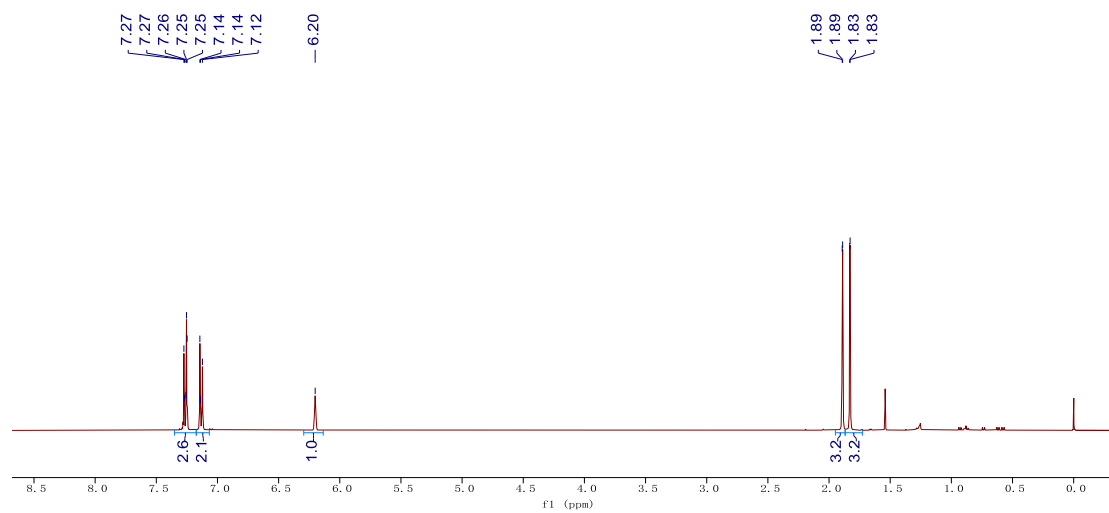

**<sup>13</sup>C NMR** of compound **28** (101 MHz in CDCl<sub>3</sub>)

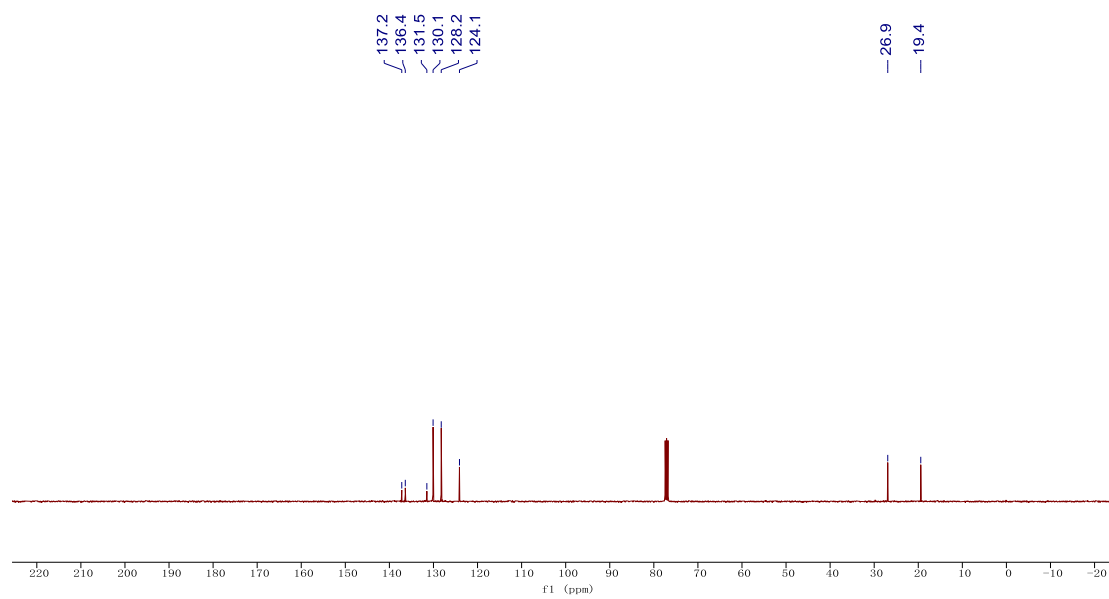

$^1\text{H}$  NMR of compound **29** (400 MHz in  $\text{CDCl}_3$ )

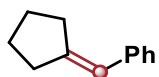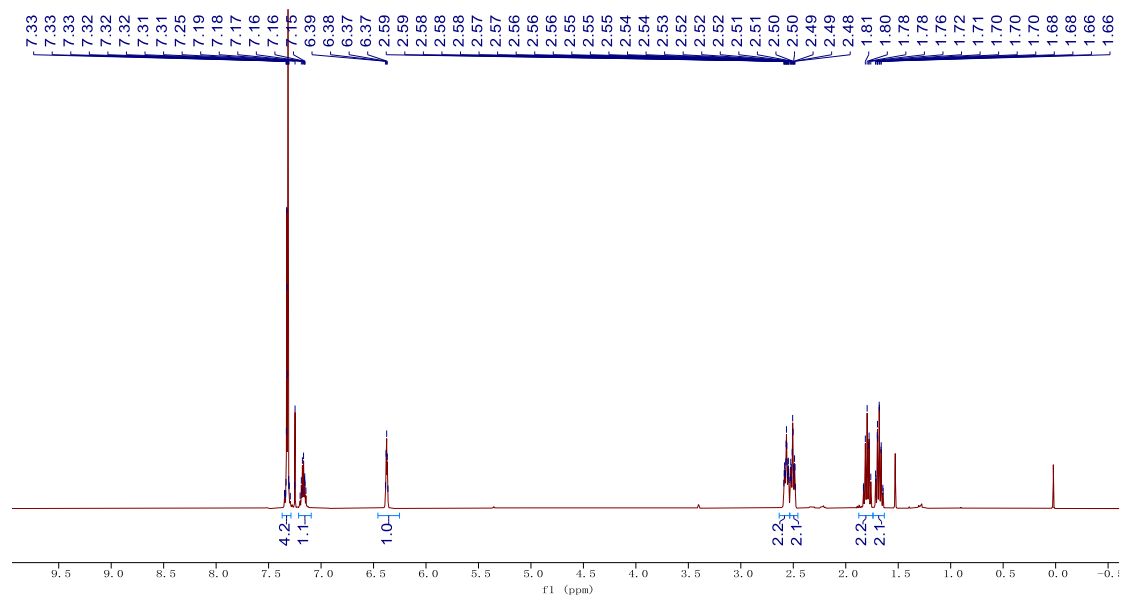

$^{13}\text{C}$  NMR of compound **29** (101 MHz in  $\text{CDCl}_3$ )

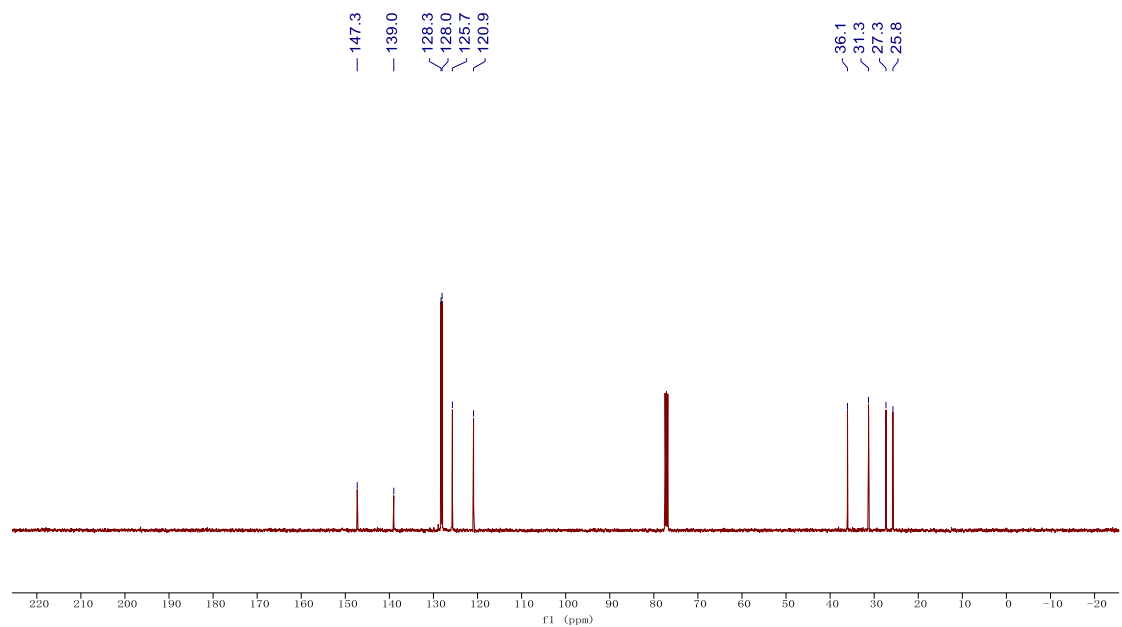

**<sup>1</sup>H NMR** of compound **30** (500 MHz in CDCl<sub>3</sub>)

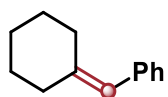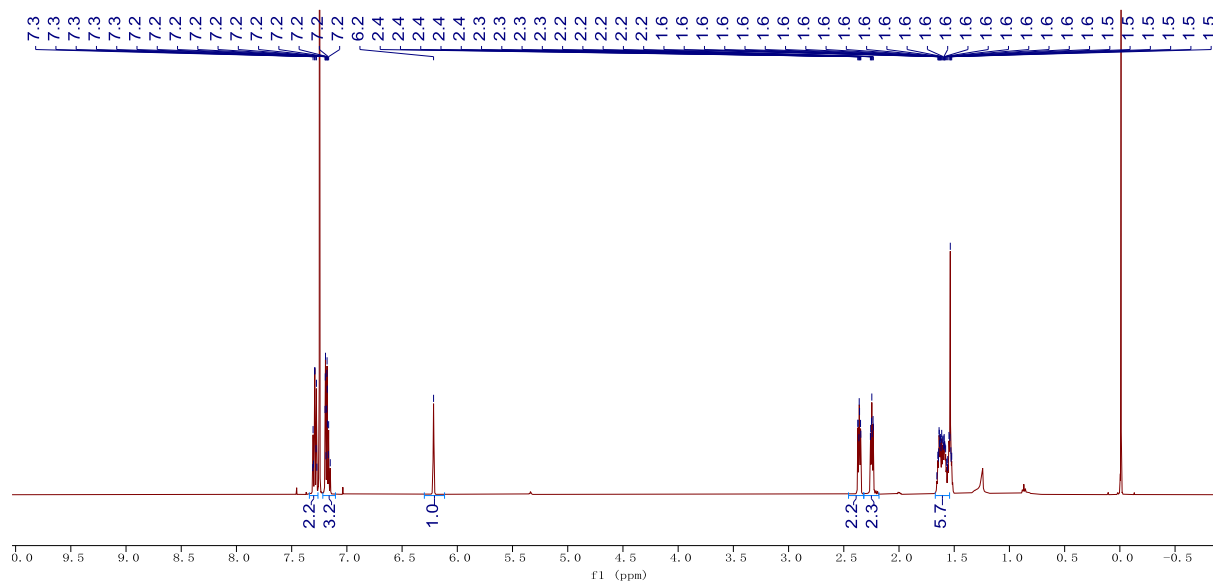

**<sup>13</sup>C NMR** of compound **30** (101 MHz in CDCl<sub>3</sub>)

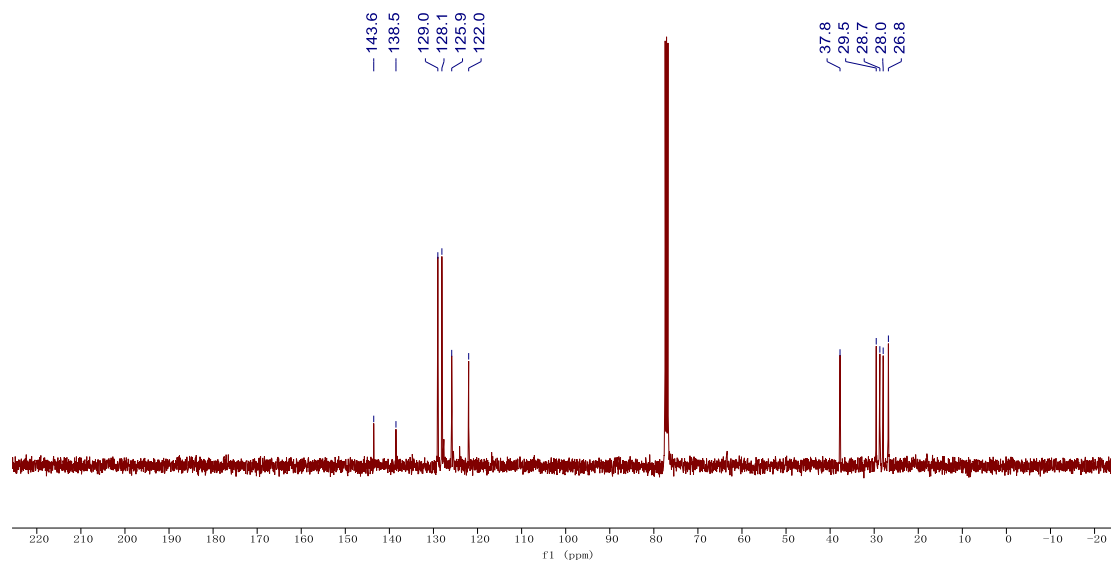

<sup>1</sup>H NMR of compound **31** (400 MHz in CDCl<sub>3</sub>)

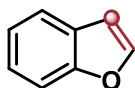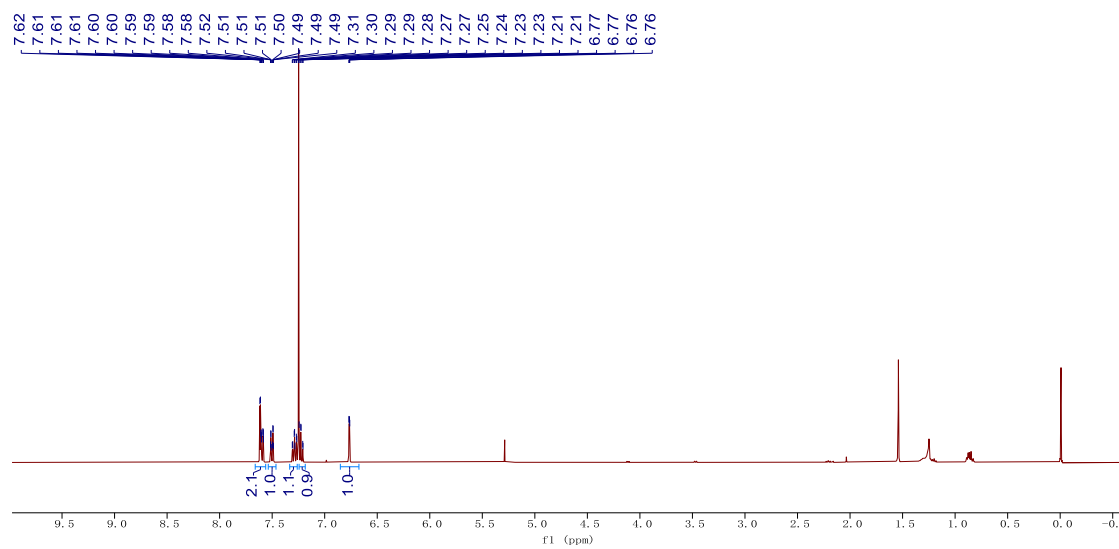

<sup>13</sup>C NMR of compound **31** (101 MHz in CDCl<sub>3</sub>)

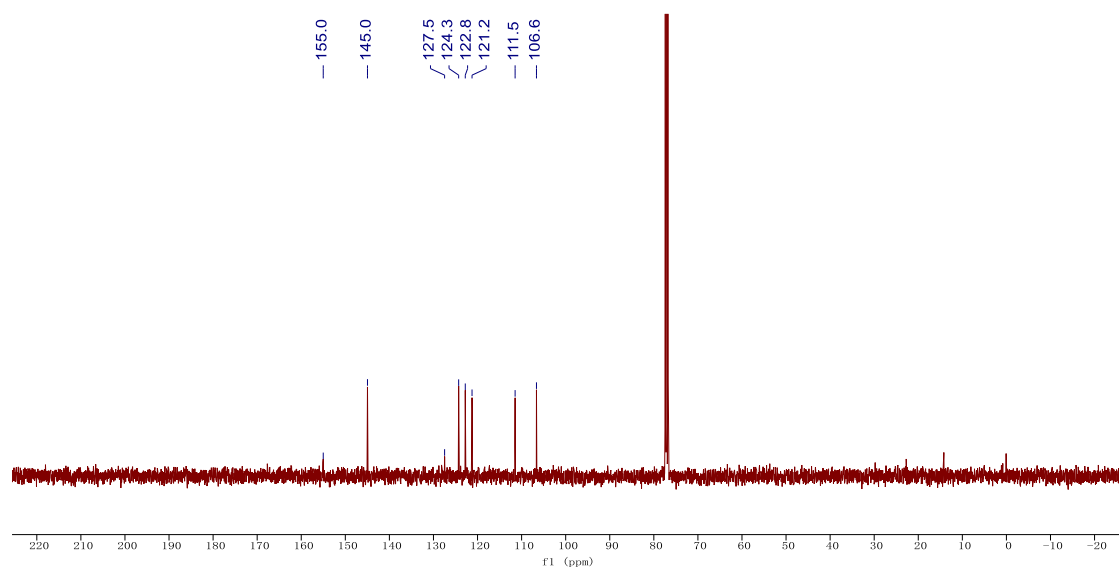

<sup>1</sup>H NMR of compound **32** (400 MHz in CDCl<sub>3</sub>)

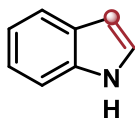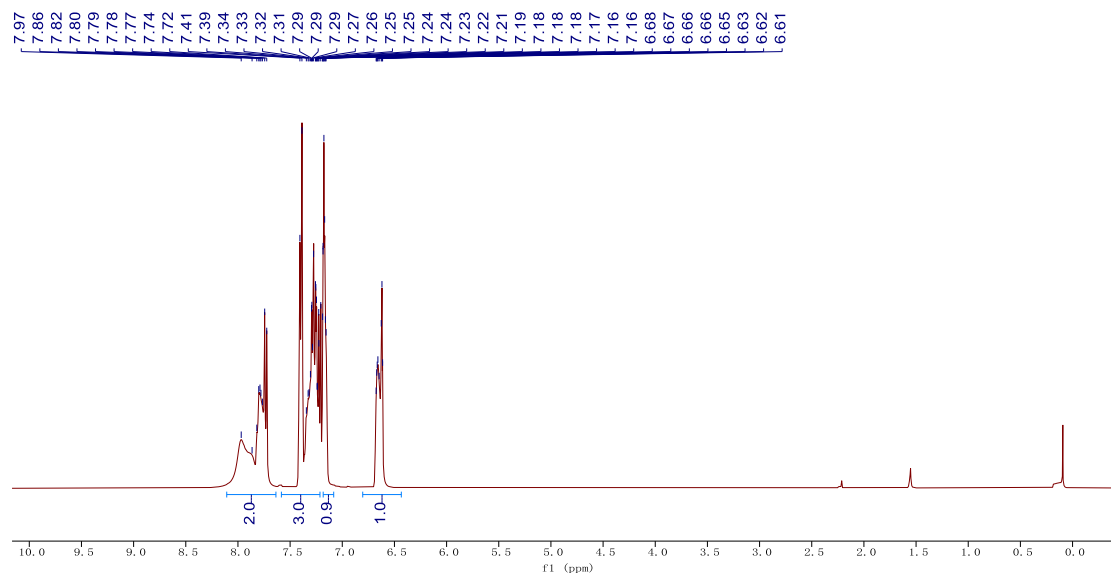

<sup>13</sup>C NMR of compound **32** (101 MHz in CDCl<sub>3</sub>)

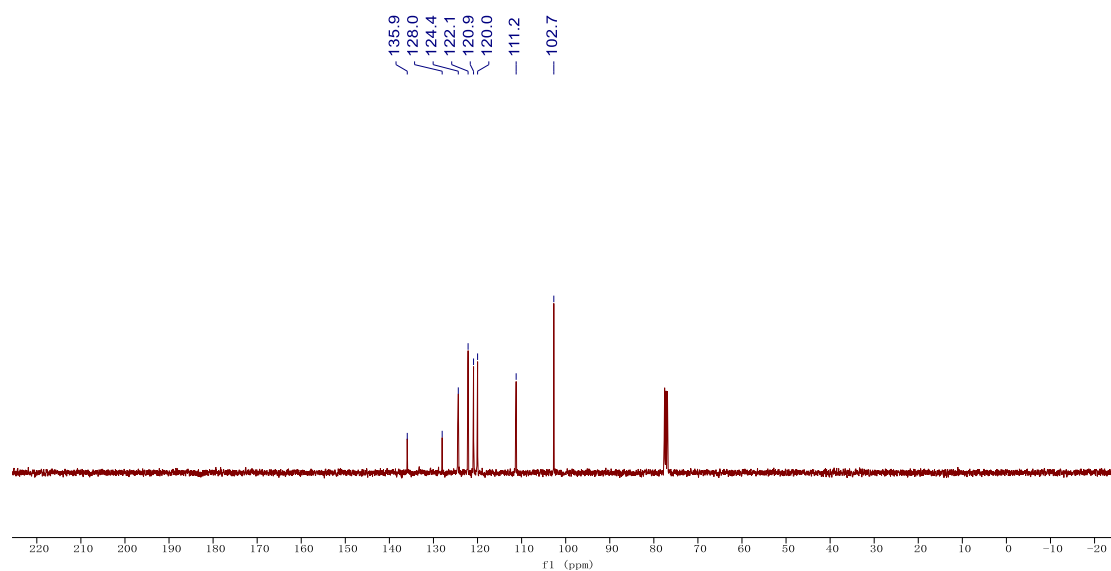

<sup>1</sup>H NMR of compound **33** (400 MHz in CDCl<sub>3</sub>)

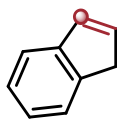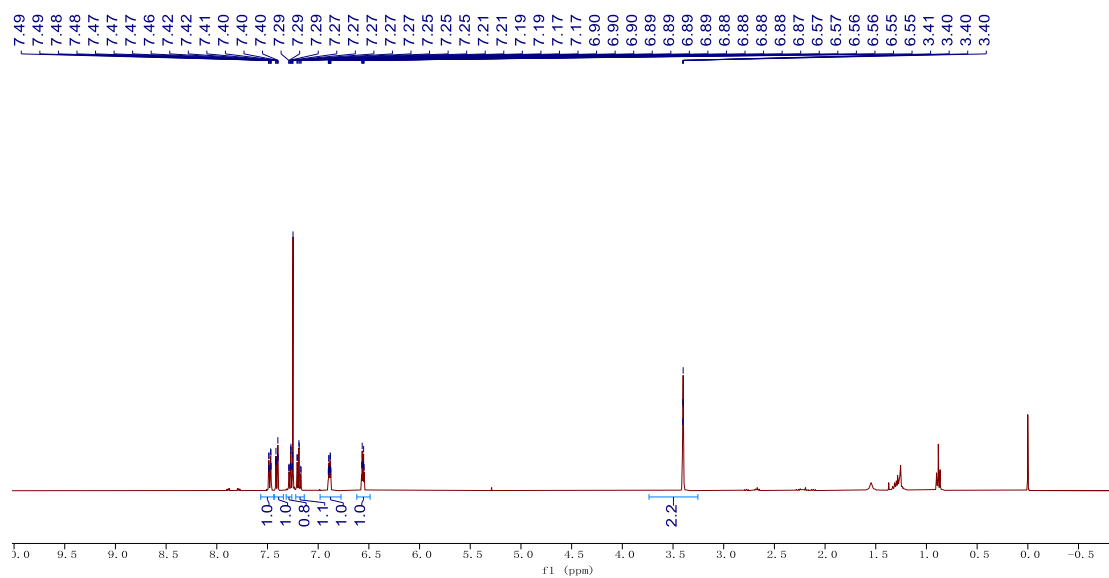

<sup>13</sup>C NMR of compound **33** (101 MHz in CDCl<sub>3</sub>)

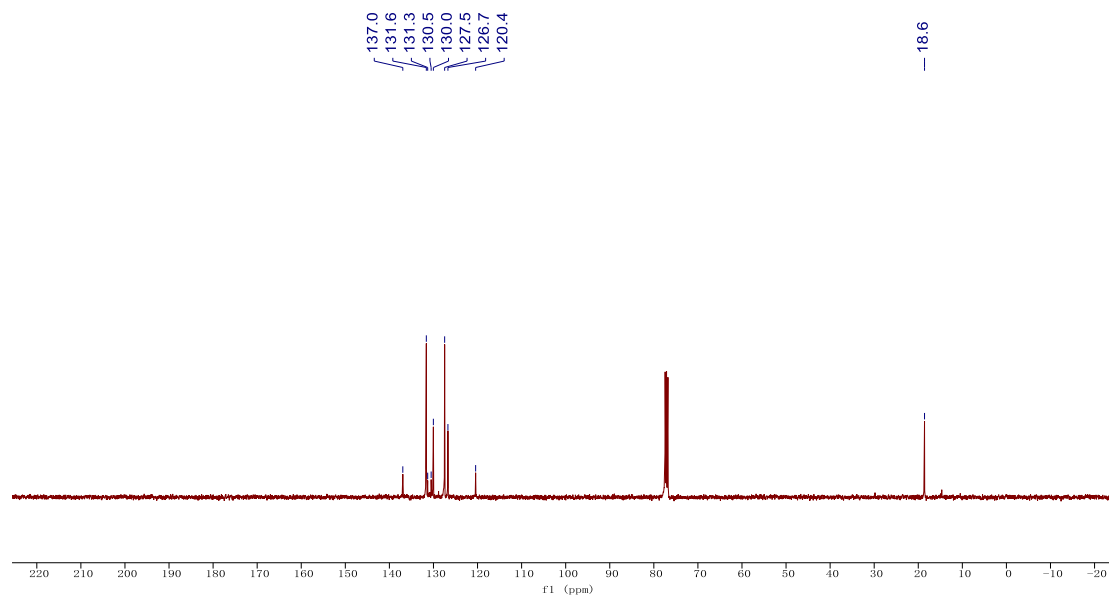

**<sup>1</sup>H NMR** of compound **34** (400 MHz in CDCl<sub>3</sub>)

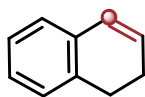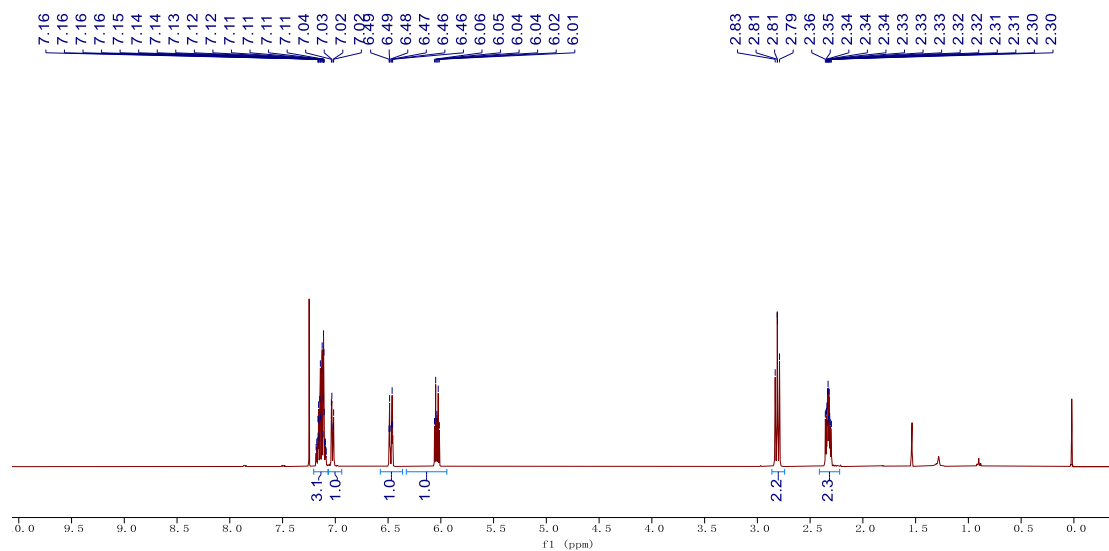

**<sup>13</sup>C NMR** of compound **34** (101 MHz in CDCl<sub>3</sub>)

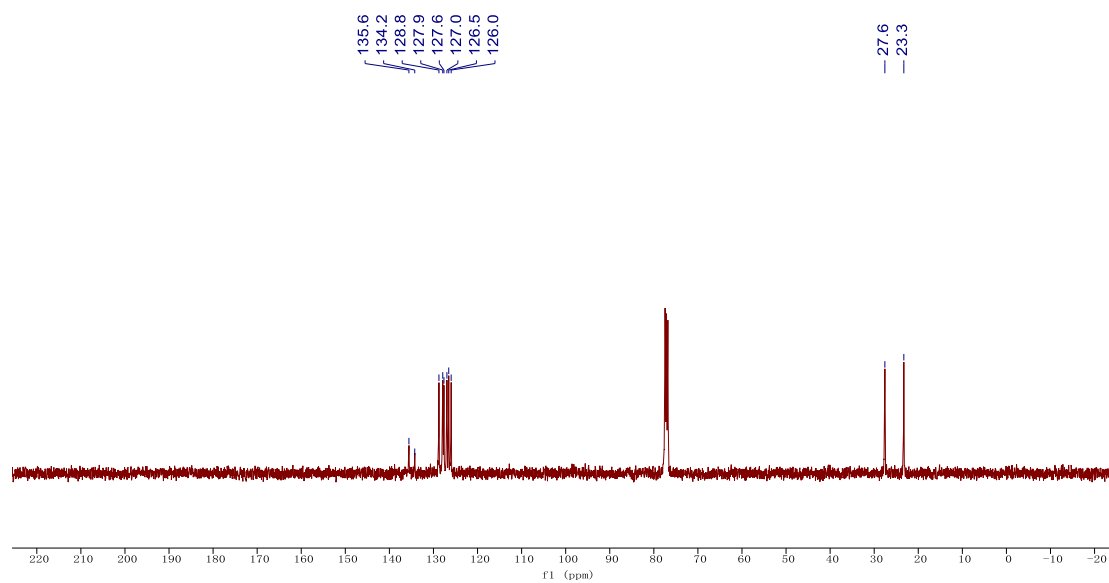

**<sup>1</sup>H NMR** of compound **35** (400 MHz in CDCl<sub>3</sub>)

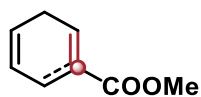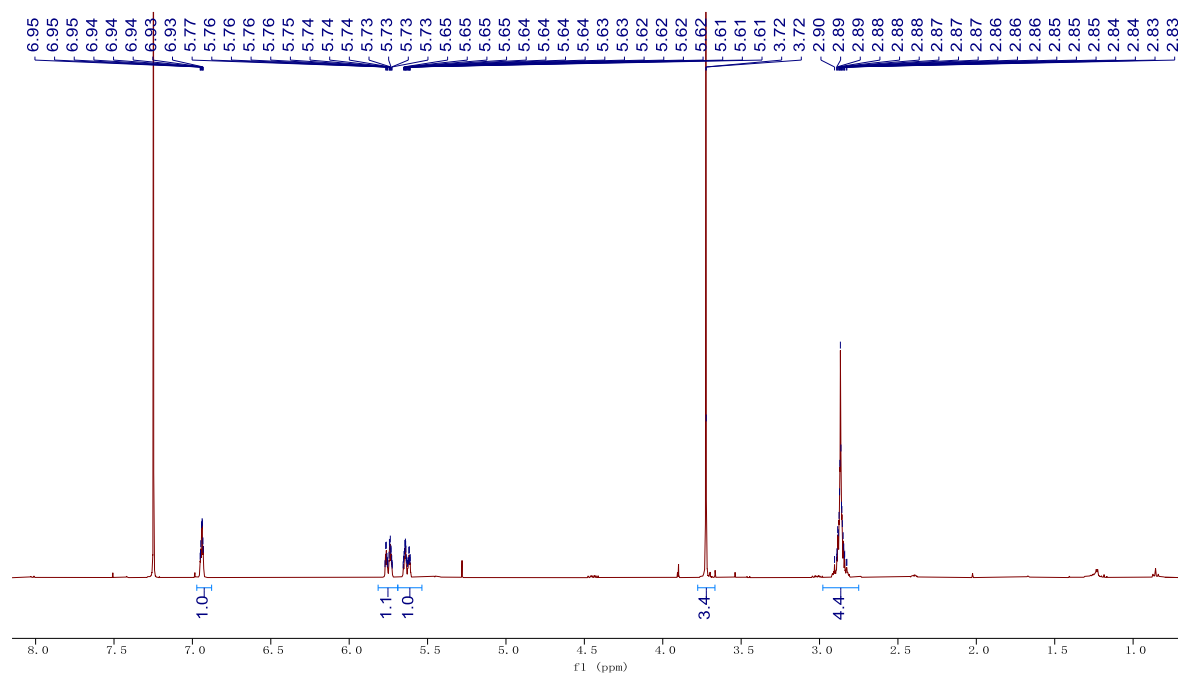

**<sup>13</sup>C NMR** of compound **35** (101 MHz in CDCl<sub>3</sub>)

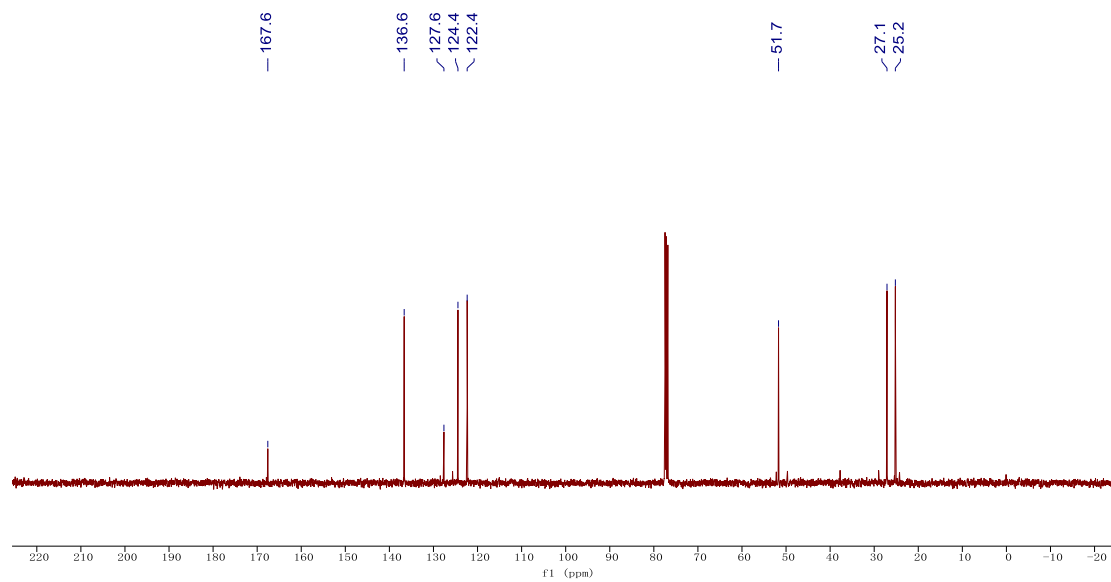



$^1\text{H}$  NMR of compound **36** (400 MHz in  $\text{CDCl}_3$ )

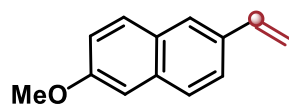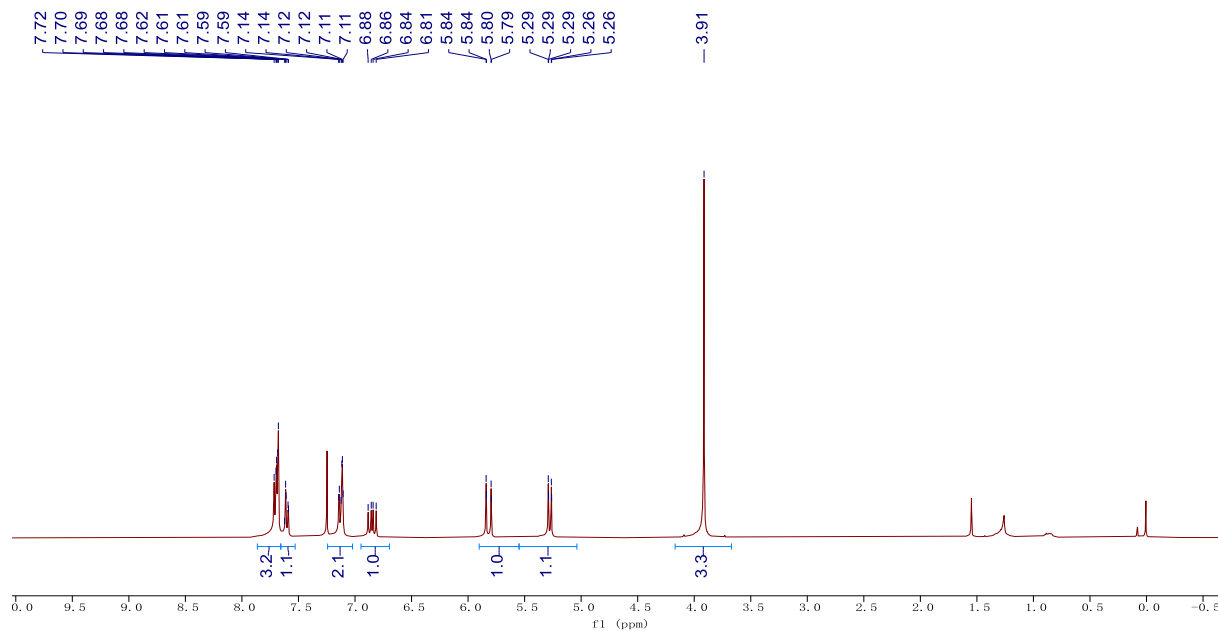

$^{13}\text{C}$  NMR of compound **36** (101 MHz in  $\text{CDCl}_3$ )

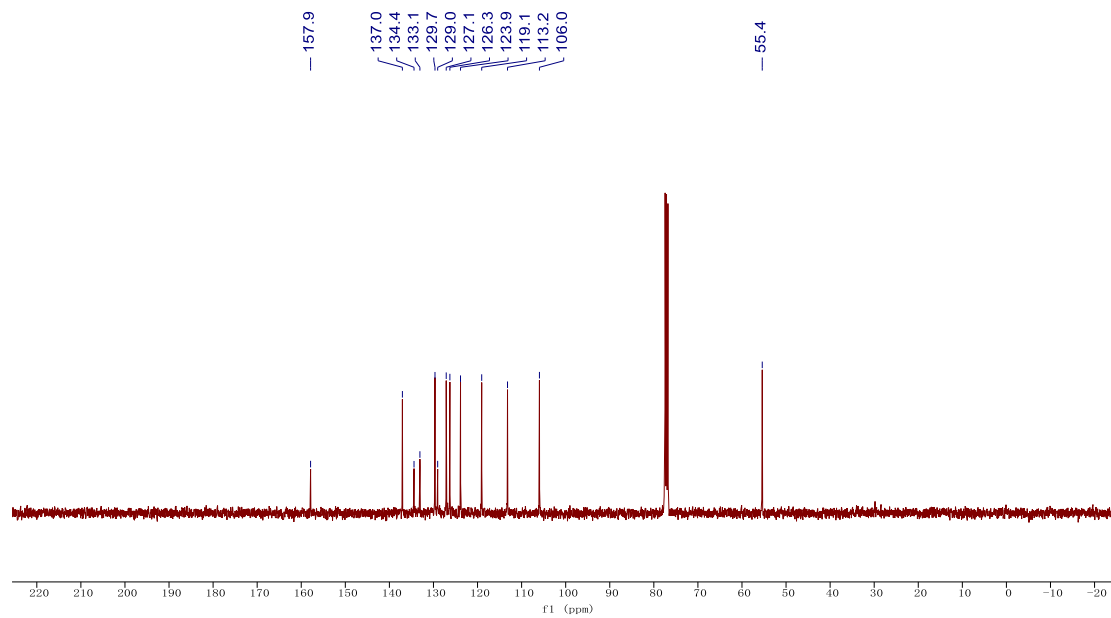

**<sup>1</sup>H NMR** of compound **37** (400 MHz in CDCl<sub>3</sub>)

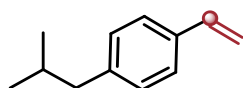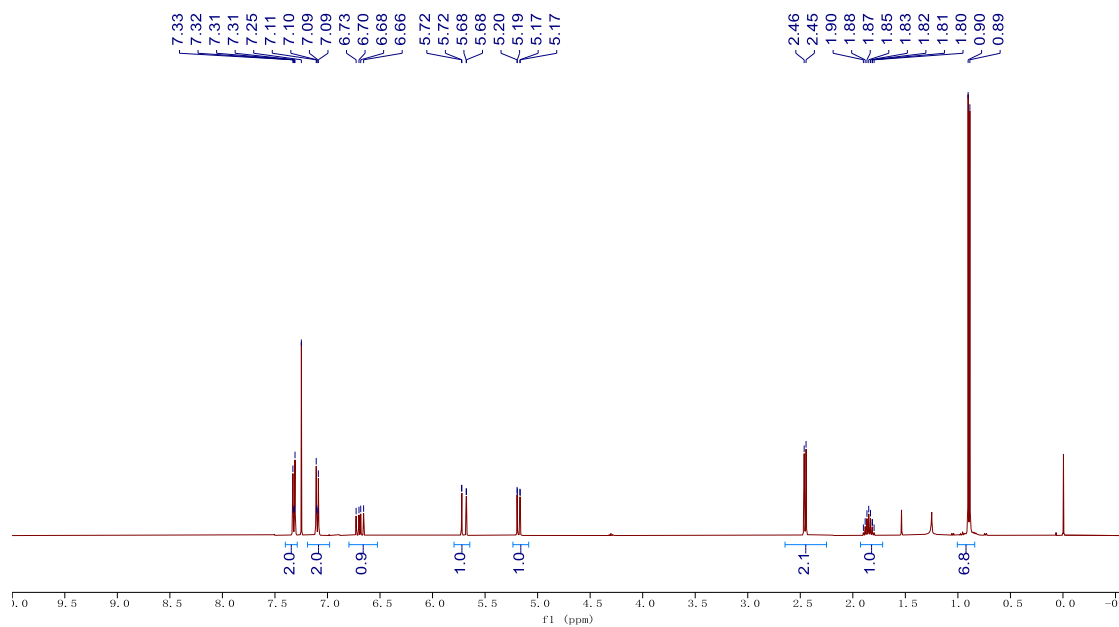

**<sup>13</sup>C NMR** of compound **37** (101 MHz in CDCl<sub>3</sub>)

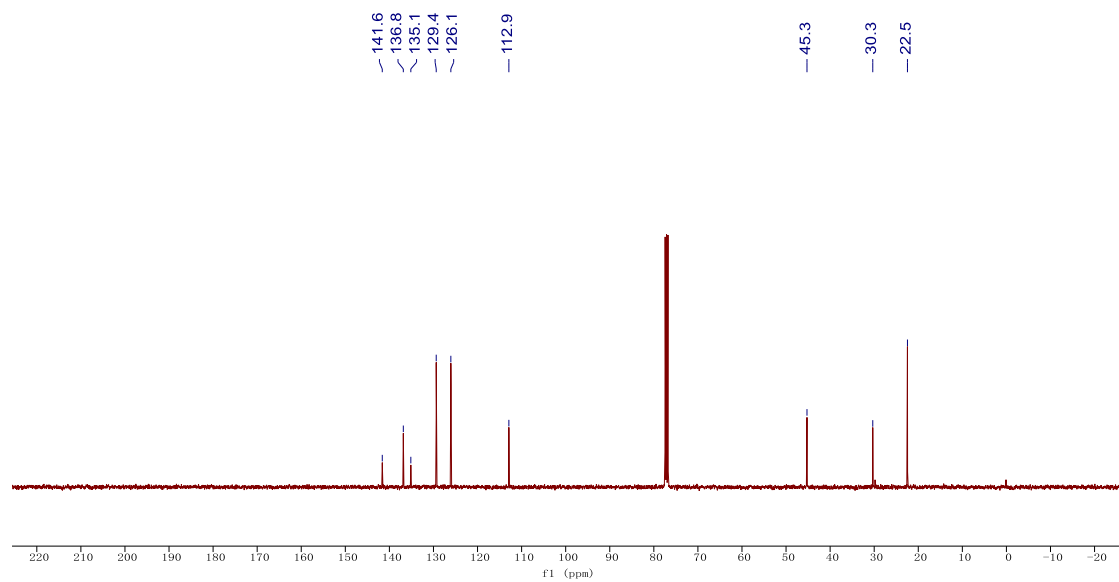

<sup>1</sup>H NMR of compound **38** (400 MHz in CDCl<sub>3</sub>)

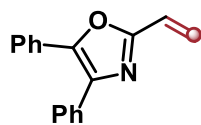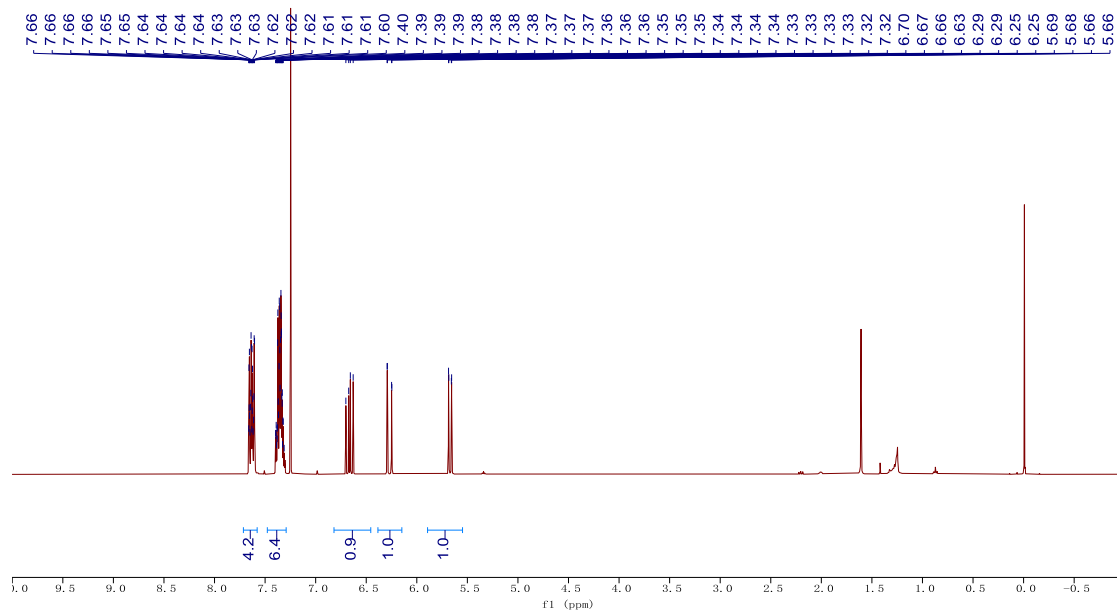

<sup>13</sup>C NMR of compound **38** (101 MHz in CDCl<sub>3</sub>)

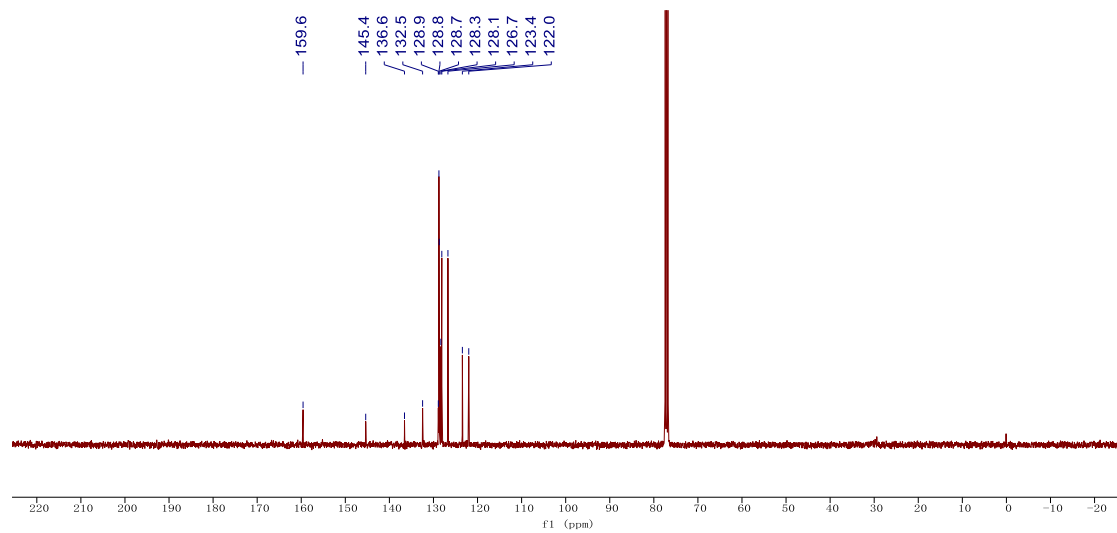

<sup>1</sup>H NMR of compound **39** (400 MHz in CDCl<sub>3</sub>)

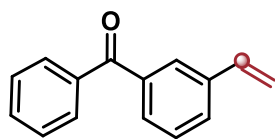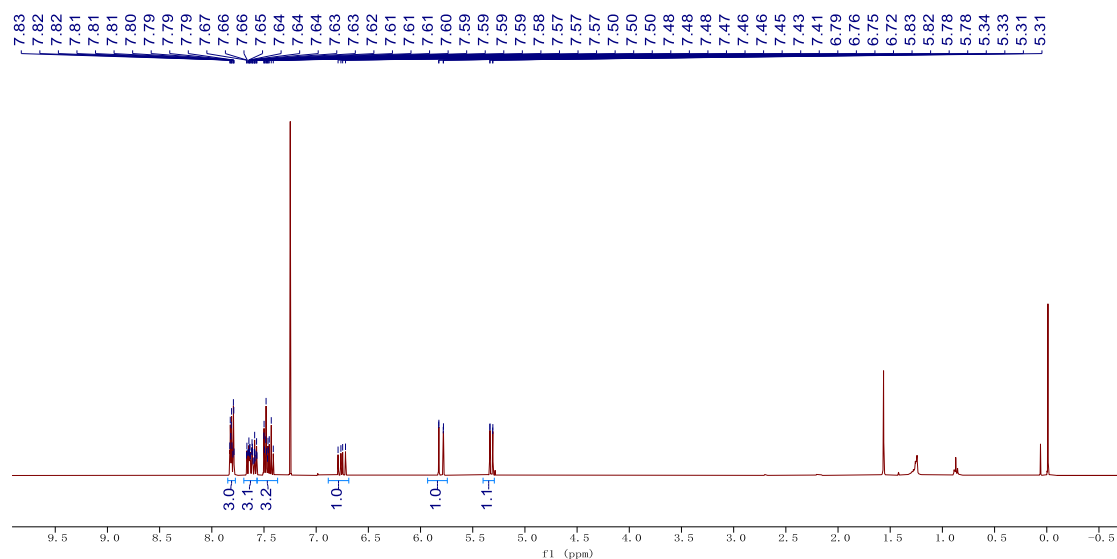

<sup>13</sup>C NMR of compound **39** (101 MHz in CDCl<sub>3</sub>)

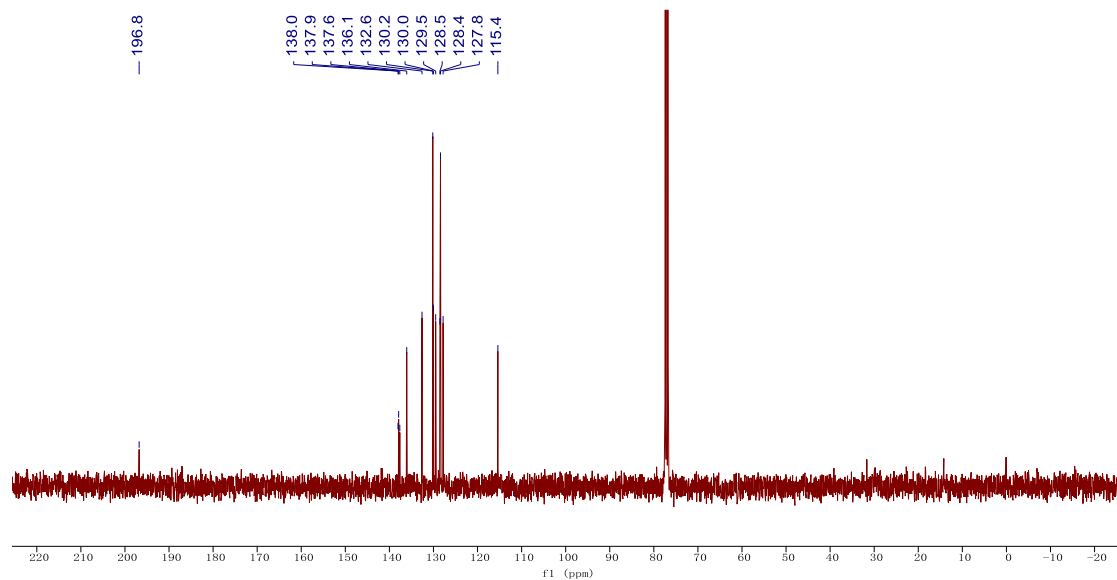

<sup>1</sup>H NMR of compound **40** (400 MHz in CDCl<sub>3</sub>)

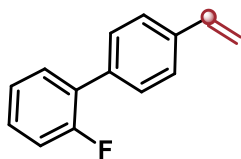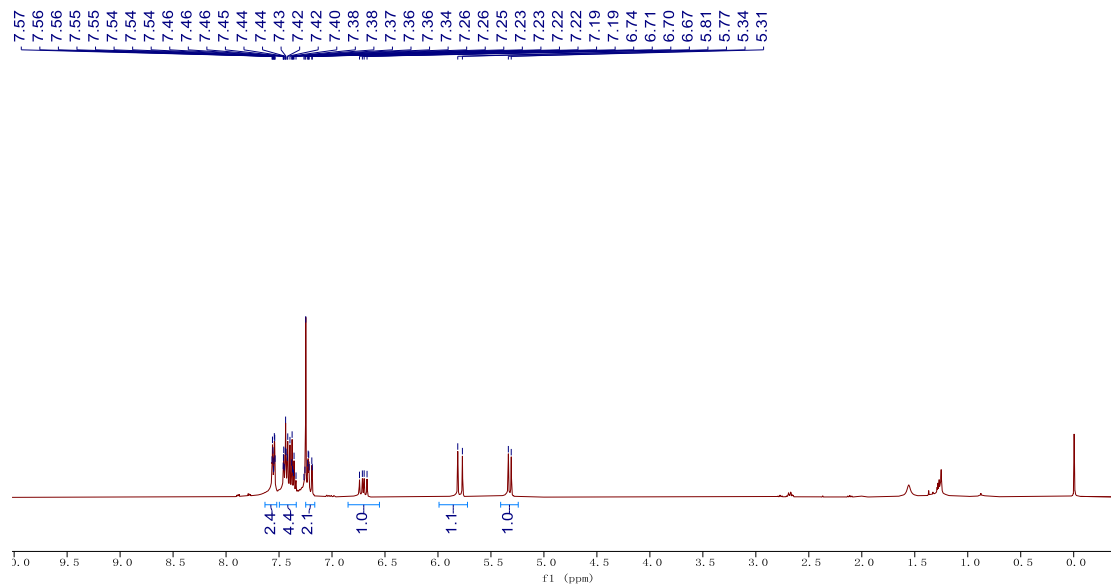

<sup>13</sup>C NMR of compound **40** (101 MHz in CDCl<sub>3</sub>)

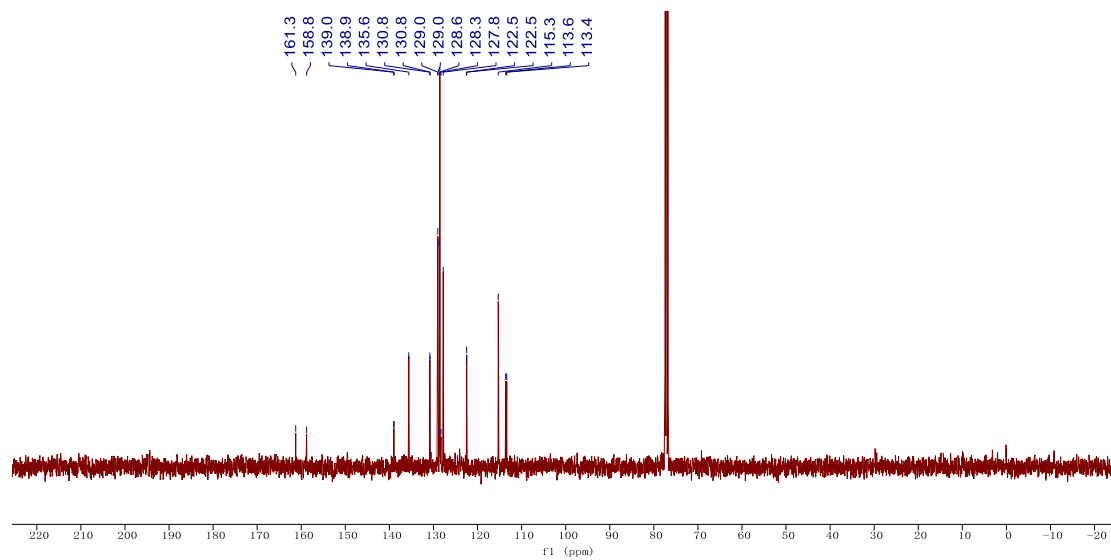

**<sup>1</sup>H NMR** of compound **41** (400 MHz in Acetone-*d*<sub>6</sub>)

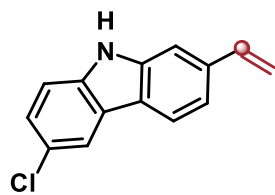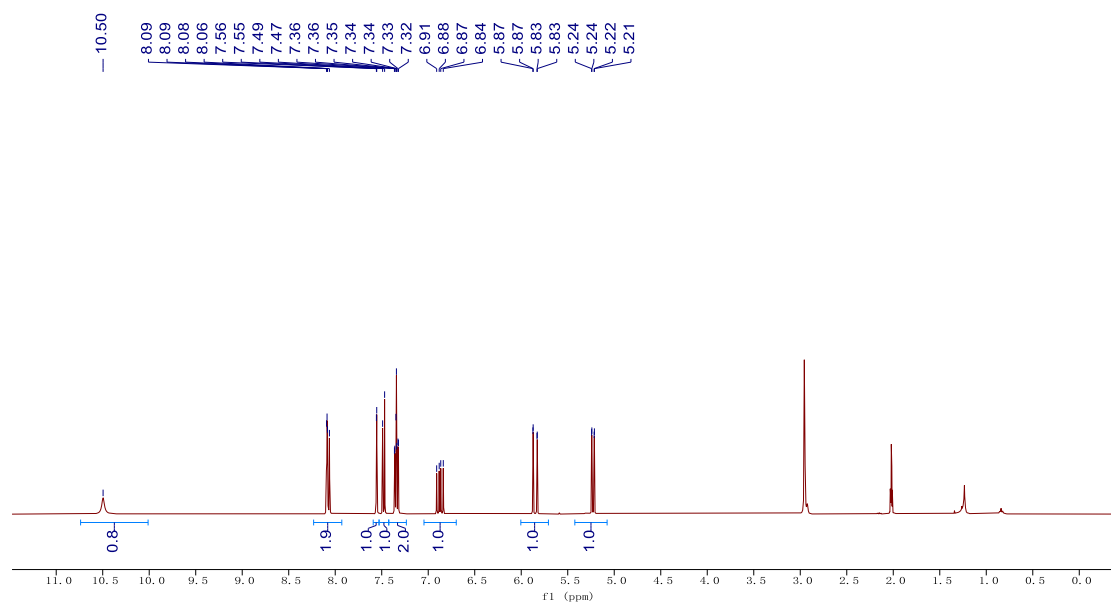

**<sup>13</sup>C NMR** of compound **41** (101 MHz in Acetone-*d*<sub>6</sub>)

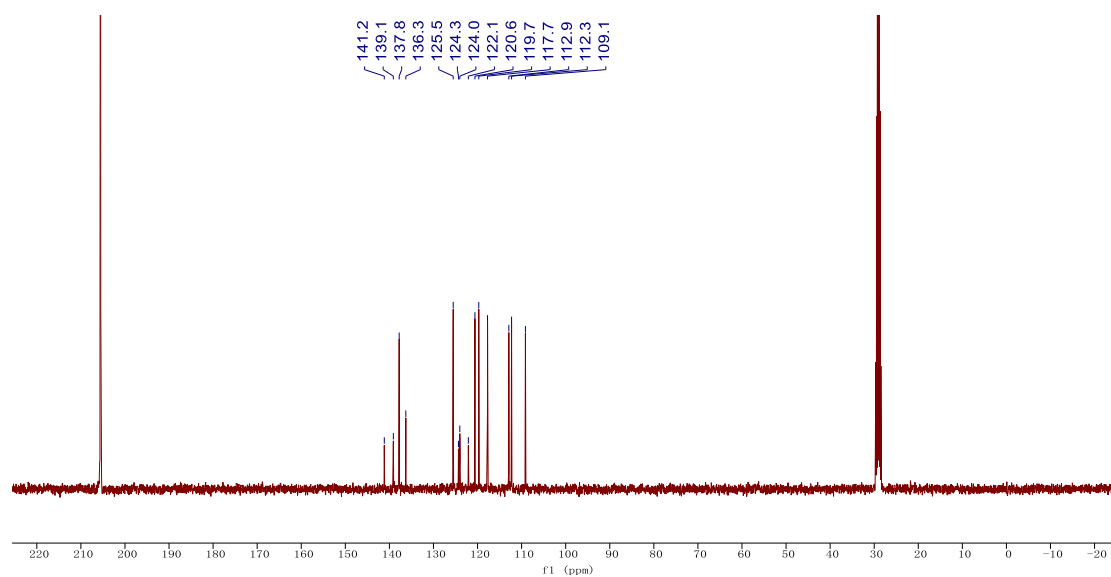

**<sup>1</sup>H NMR of compound 42 (400 MHz in CDCl<sub>3</sub>)**

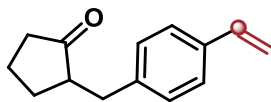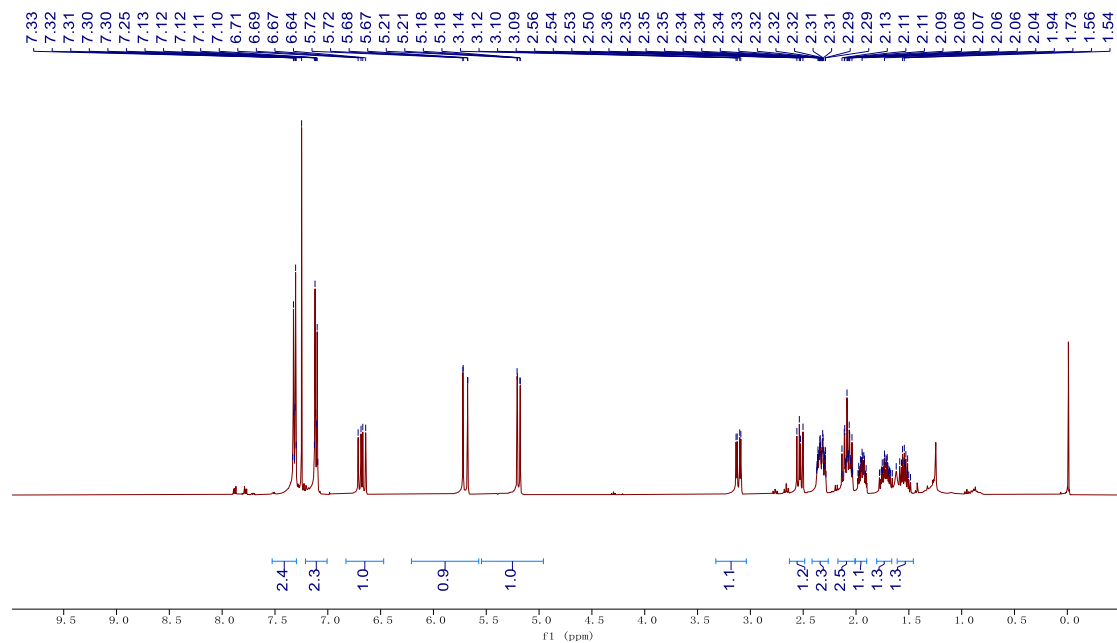

**<sup>13</sup>C NMR of compound 42 (101 MHz in CDCl<sub>3</sub>)**

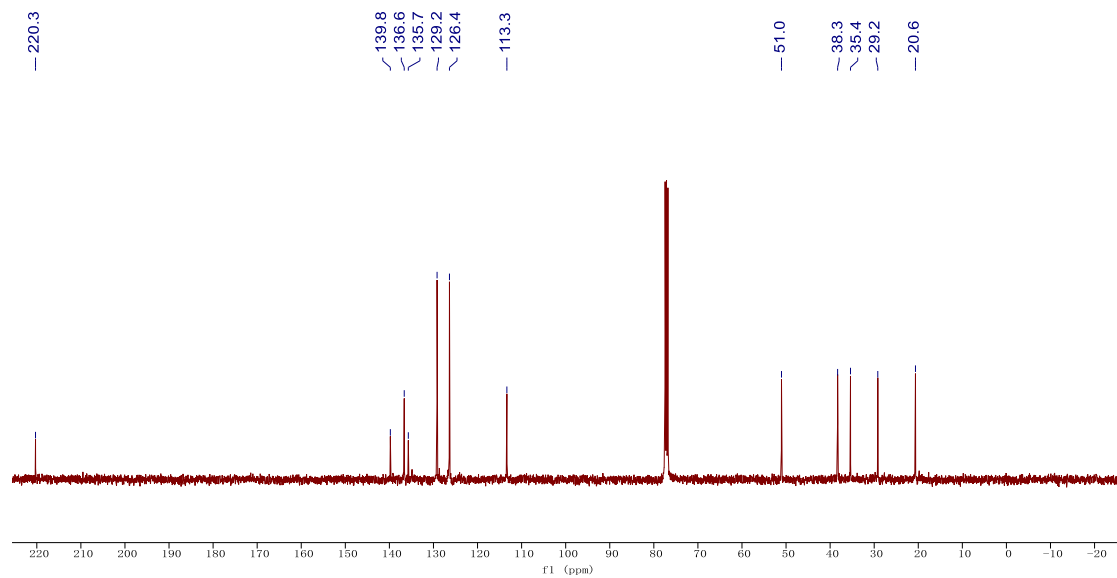

<sup>1</sup>H NMR of compound **43** (400 MHz in CDCl<sub>3</sub>)

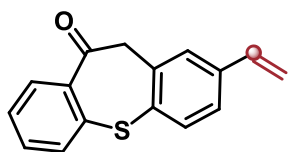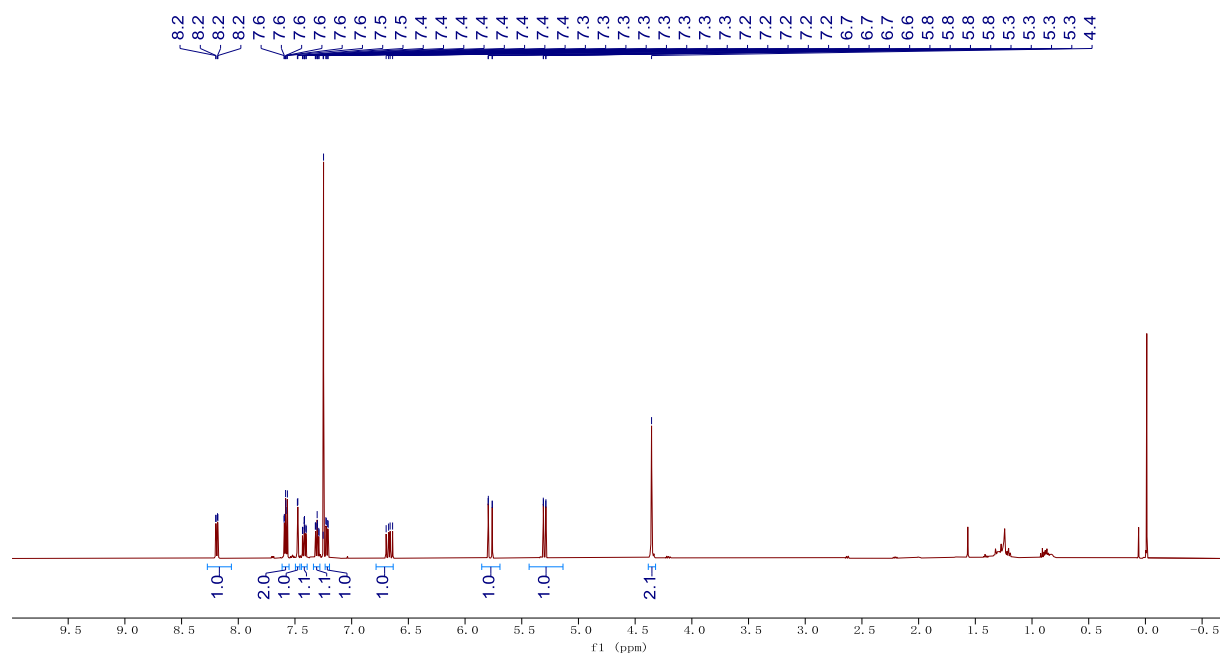

<sup>13</sup>C NMR of compound **43** (101 MHz in CDCl<sub>3</sub>)

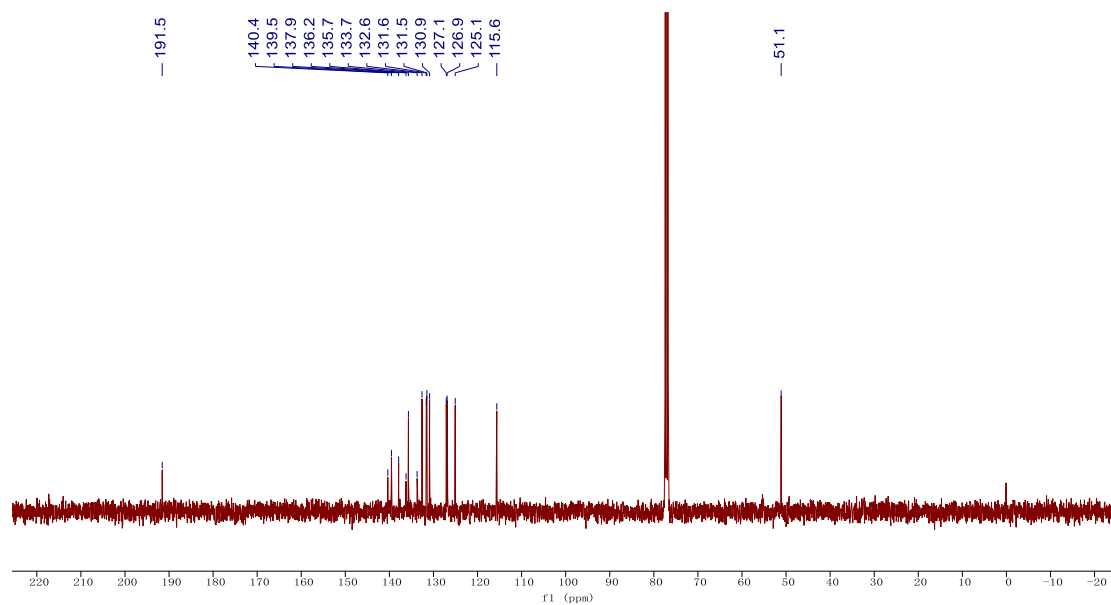



**<sup>1</sup>H NMR of compound 44 (400 MHz in CDCl<sub>3</sub>)**

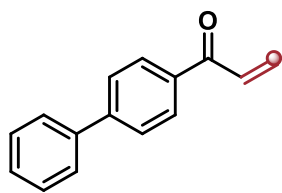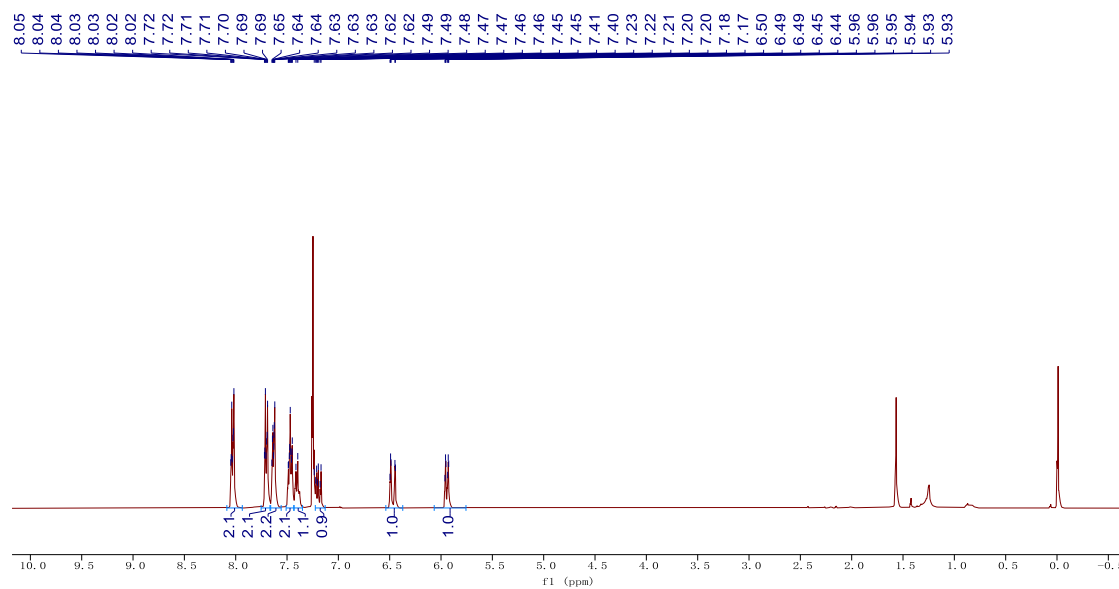

**<sup>13</sup>C NMR of compound 44 (101 MHz in CDCl<sub>3</sub>)**

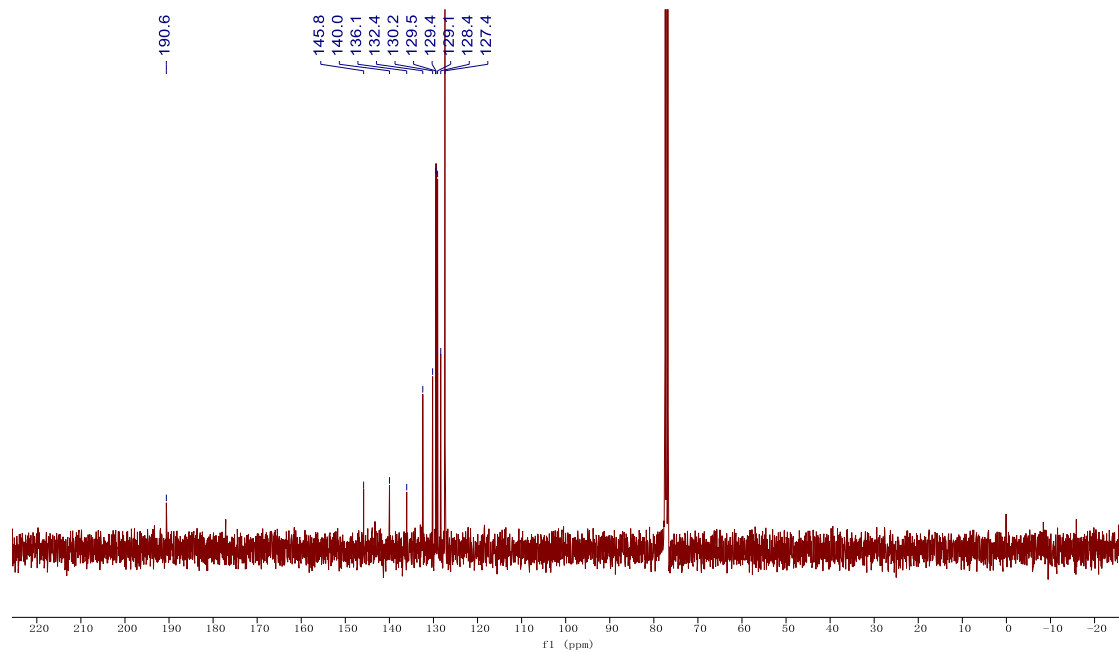

<sup>1</sup>H NMR of compound **45** (400 MHz in CDCl<sub>3</sub>)

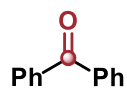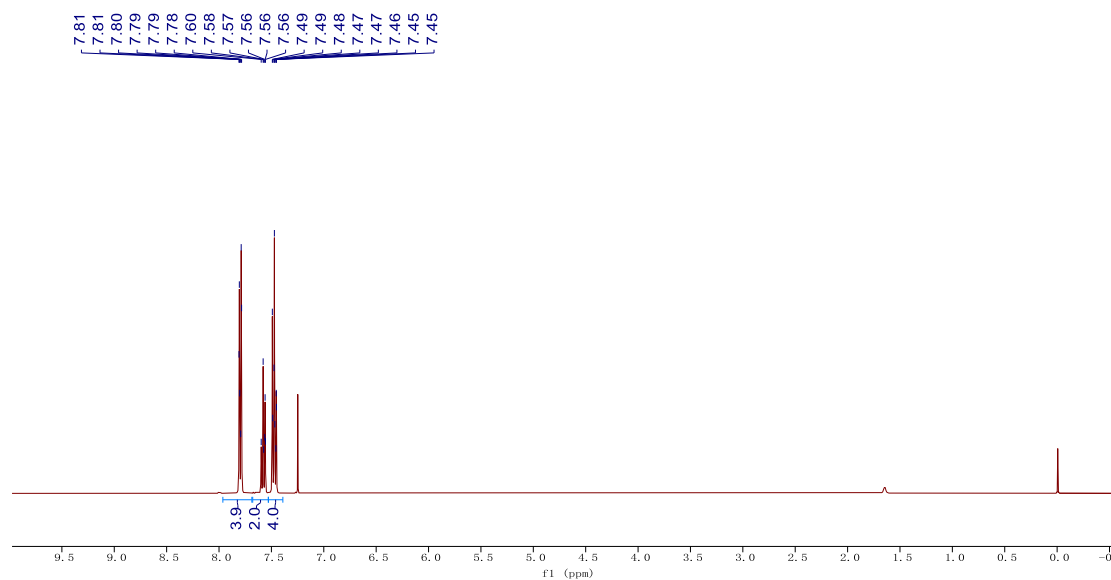

<sup>13</sup>C NMR of compound **45** (101 MHz in CDCl<sub>3</sub>)

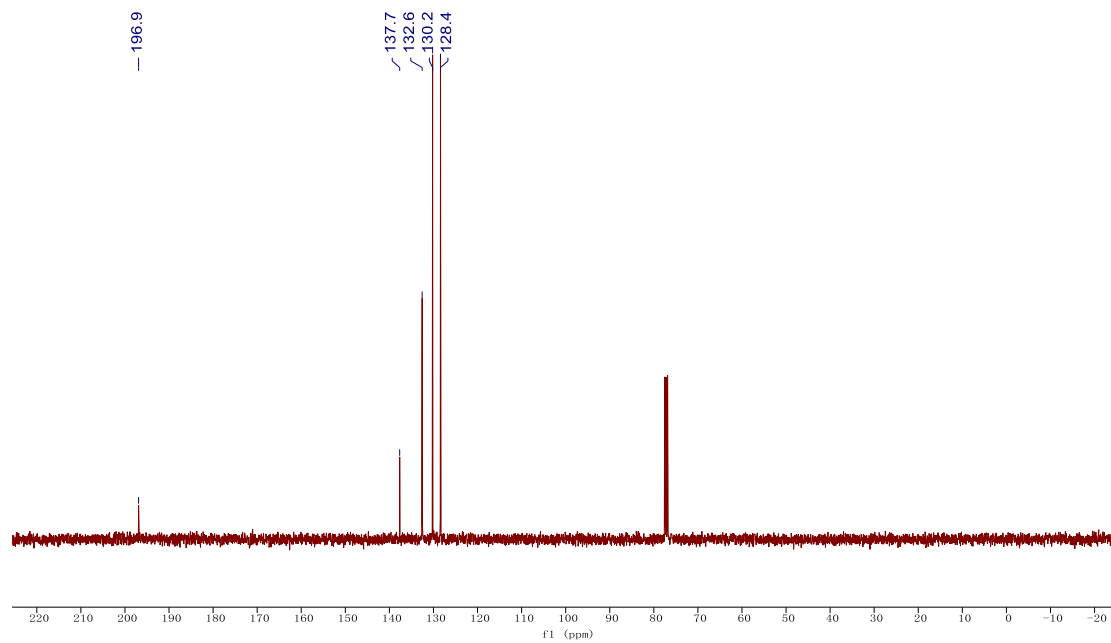

**<sup>1</sup>H NMR** of compound **46** (400 MHz in CDCl<sub>3</sub>)

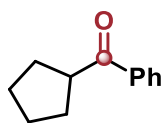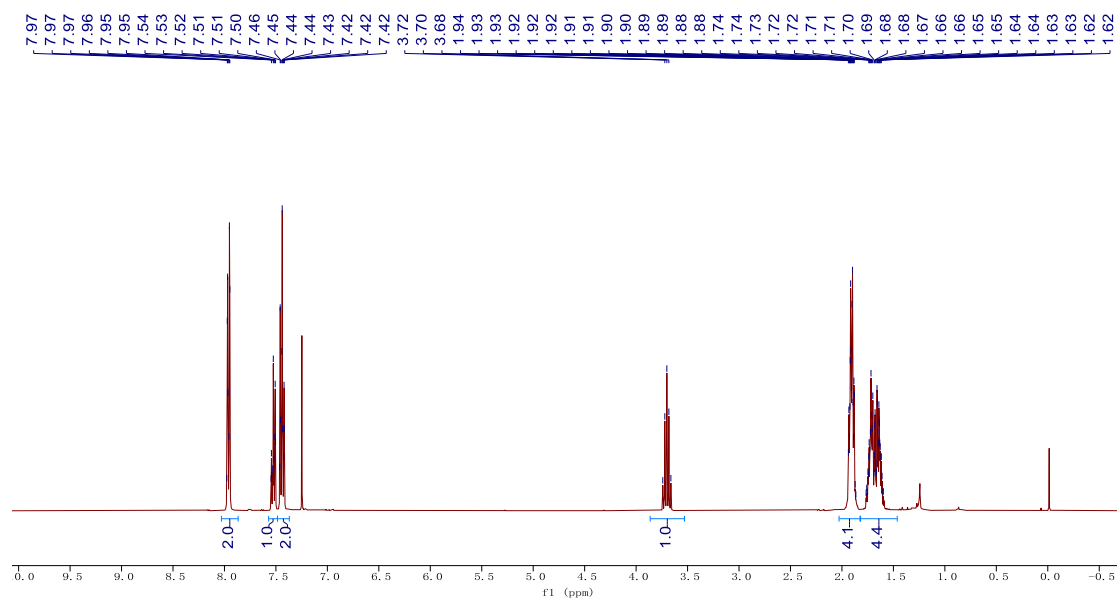

**<sup>13</sup>C NMR** of compound **46** (101 MHz in CDCl<sub>3</sub>)

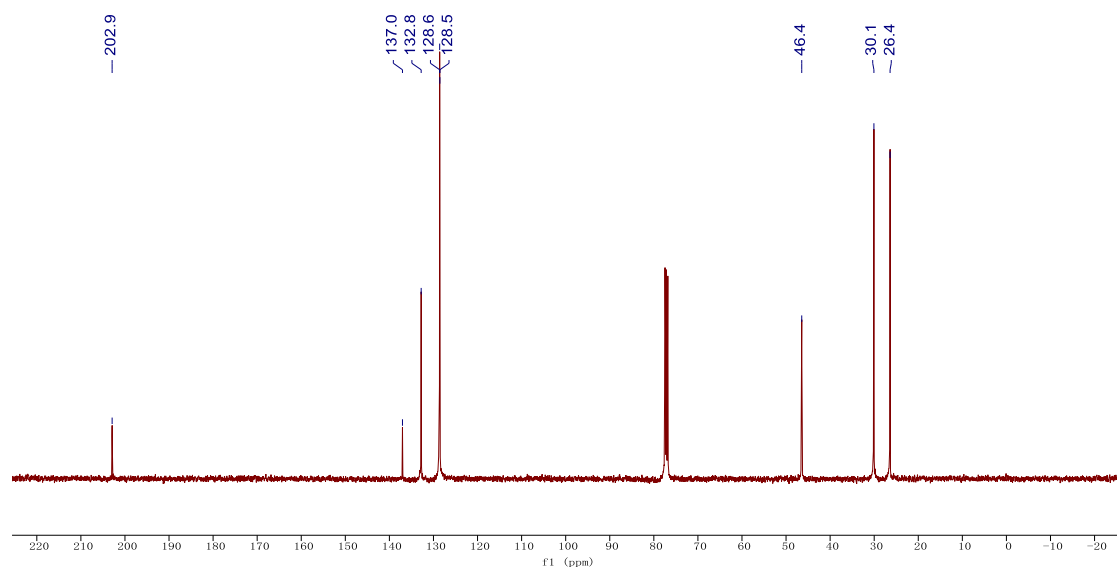

$^1\text{H}$  NMR of compound **47** (400 MHz in  $\text{CDCl}_3$ )

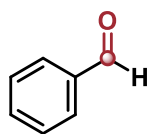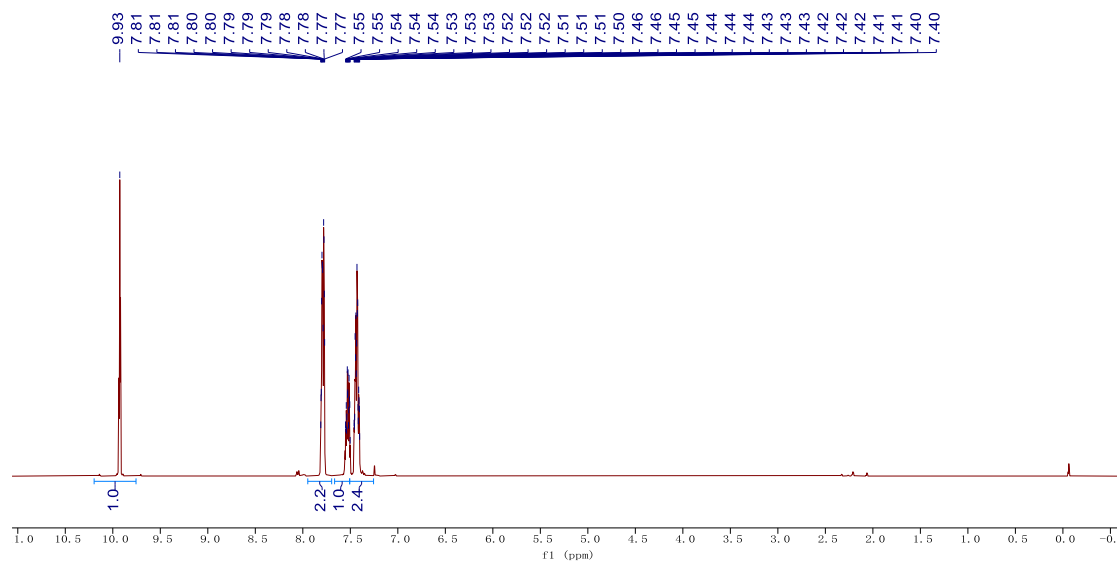

$^{13}\text{C}$  NMR of compound **47** (101 MHz in  $\text{CDCl}_3$ )

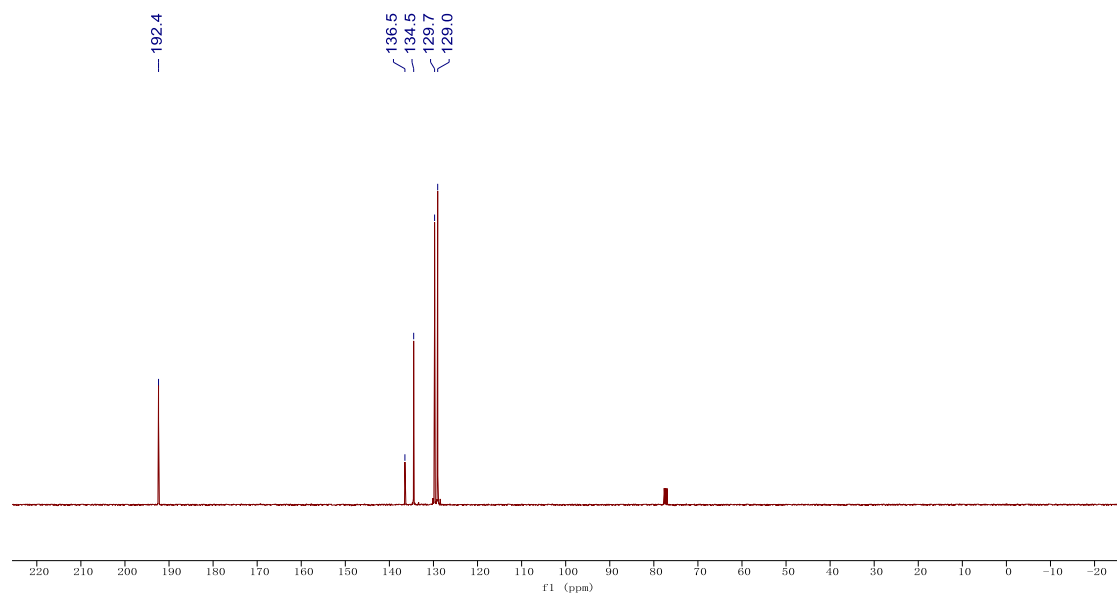

$^1\text{H}$  NMR of compound **48** (400 MHz in  $\text{CDCl}_3$ )

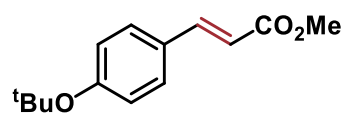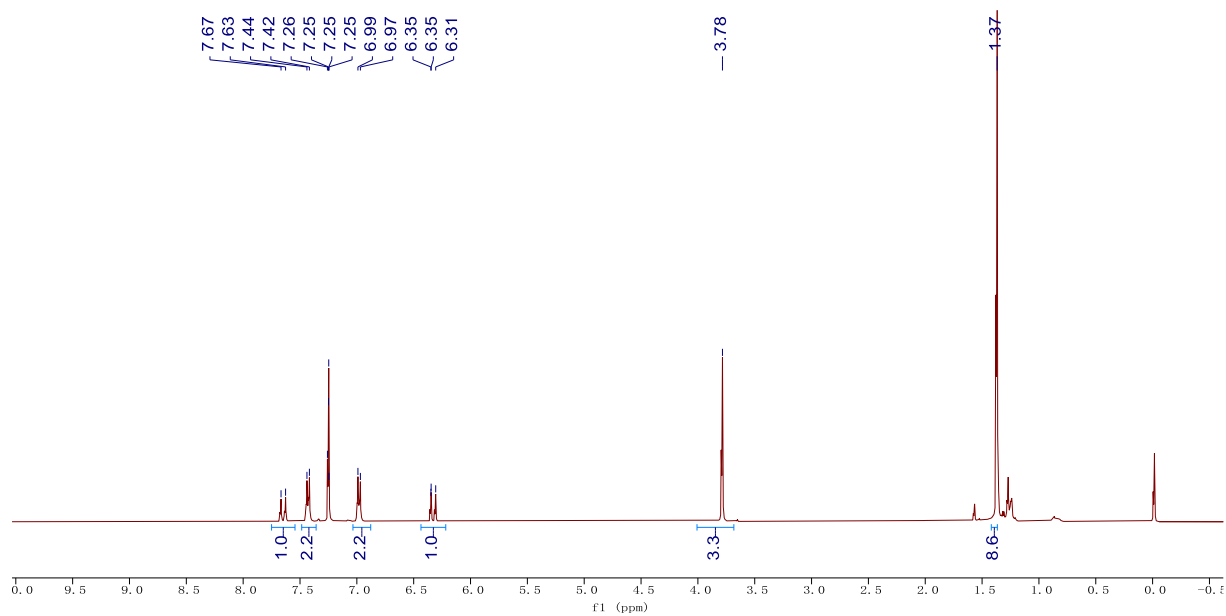

$^{13}\text{C}$  NMR of compound **48** (101 MHz in  $\text{CDCl}_3$ )

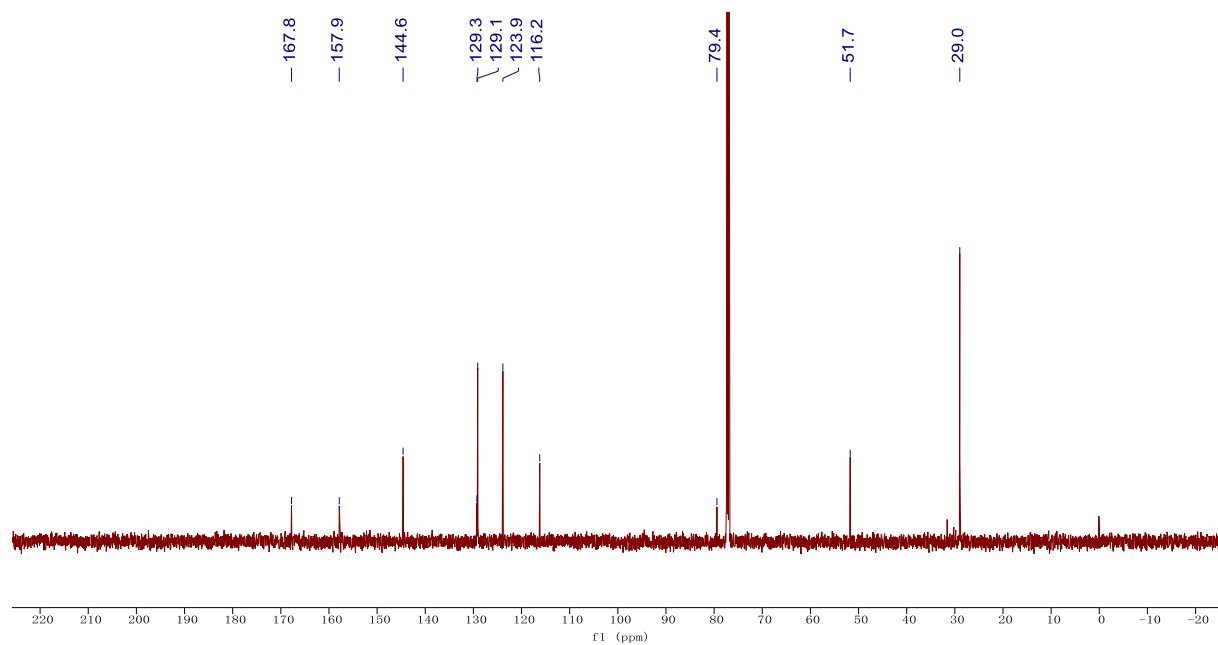

**<sup>1</sup>H NMR** of compound **49** (500 MHz in Acetonitrile-*d*<sub>3</sub>)

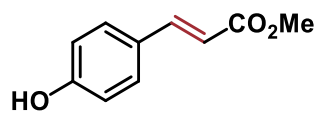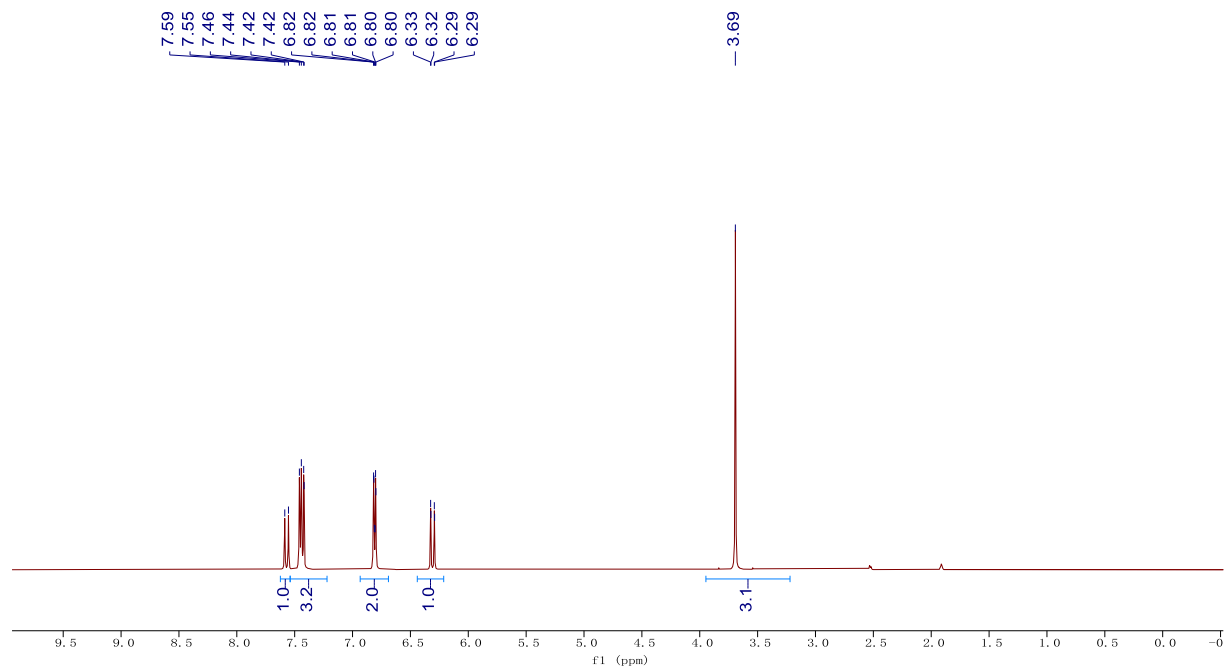

**<sup>13</sup>C NMR** of compound 49(126 MHz in Acetonitrile-*d*<sub>3</sub>)

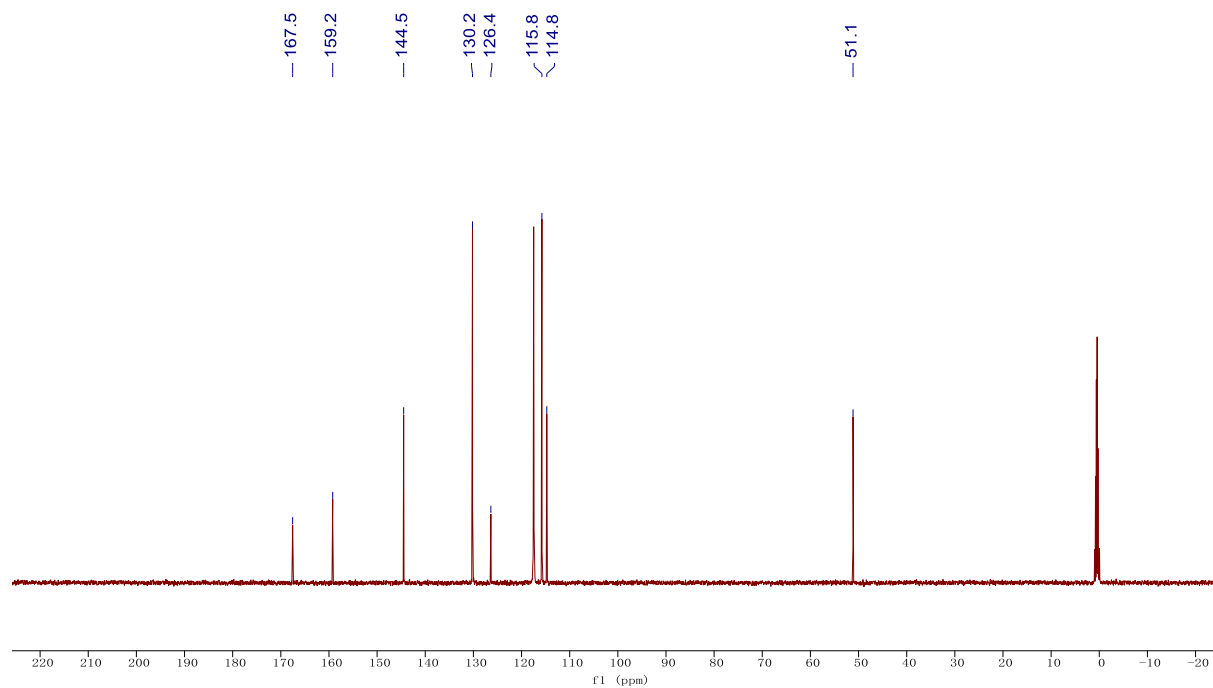

**<sup>1</sup>H NMR** of compound **50** (500 MHz in CDCl<sub>3</sub>)

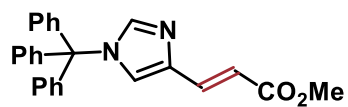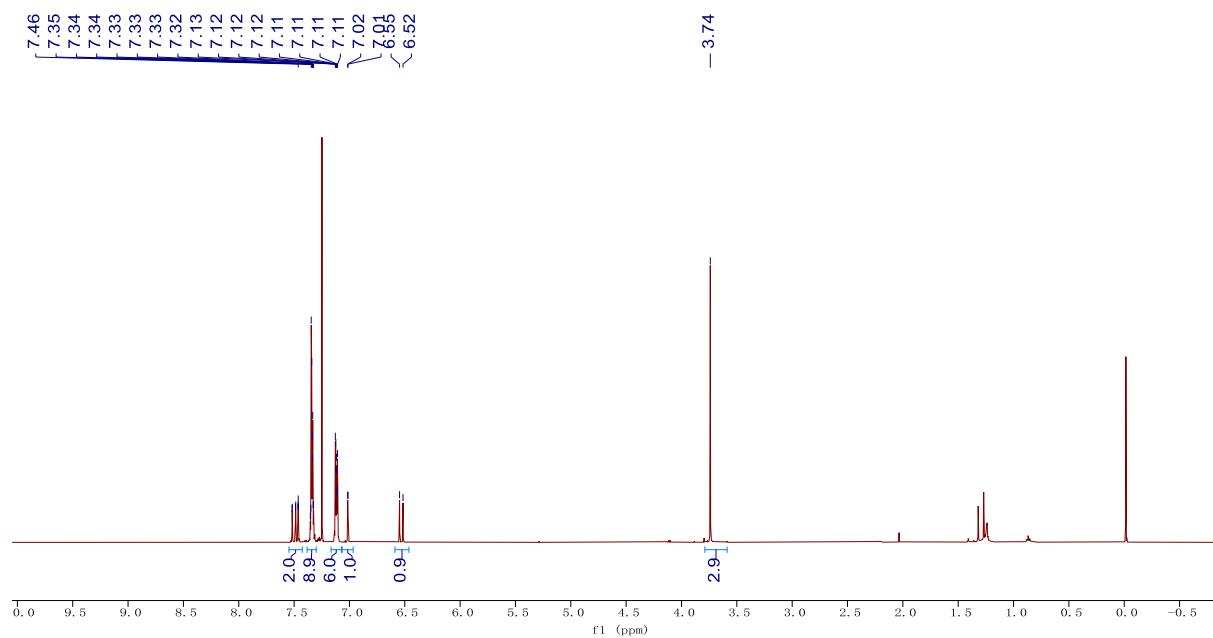

**<sup>13</sup>C NMR** of compound **50** (126 MHz in CDCl<sub>3</sub>)

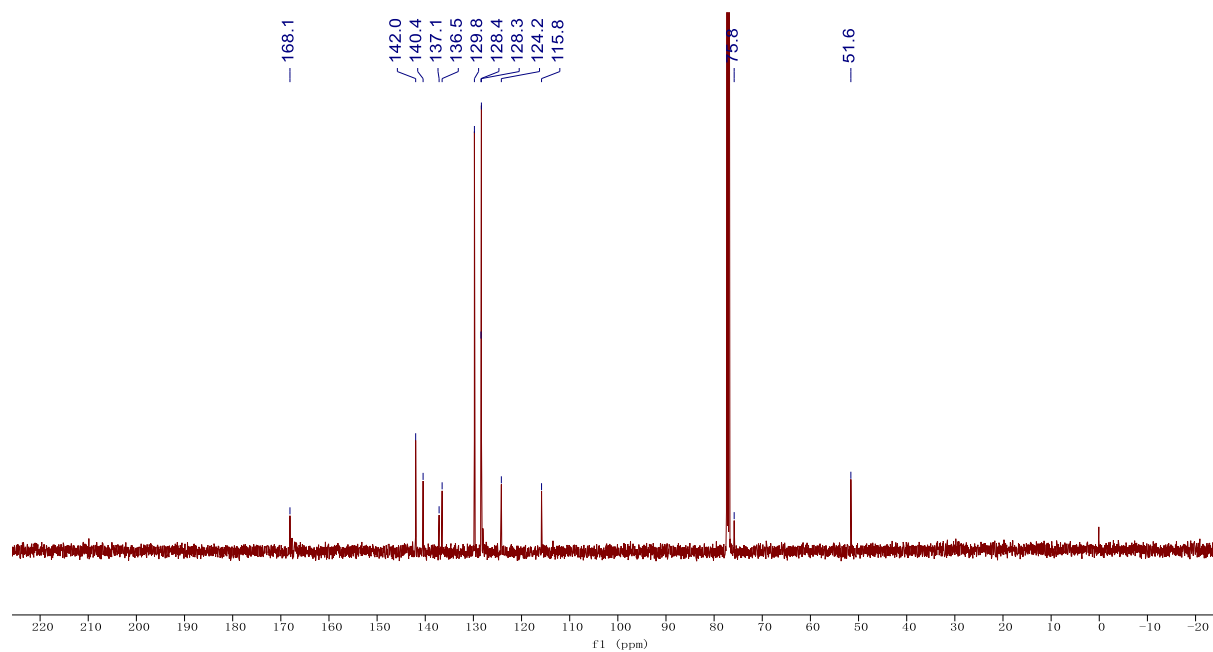

**<sup>1</sup>H NMR** of compound **51** (500 MHz in CDCl<sub>3</sub>)

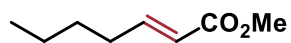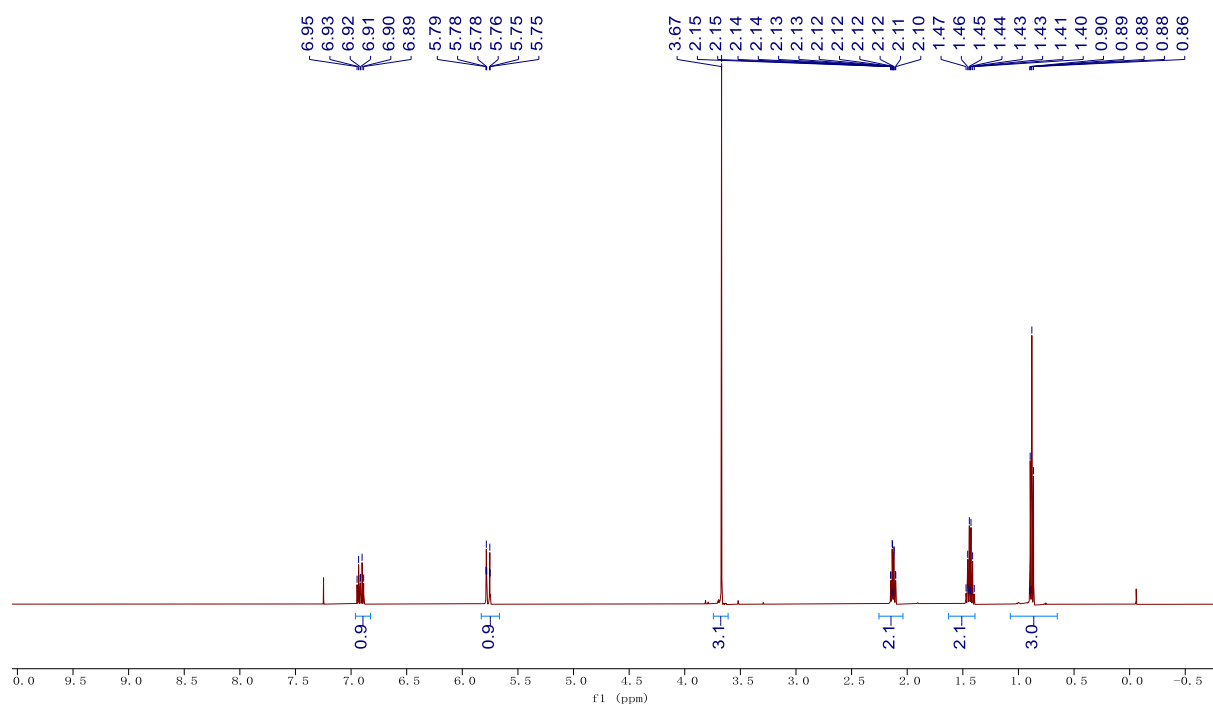

**<sup>13</sup>C NMR** of compound **51** (126 MHz in CDCl<sub>3</sub>)

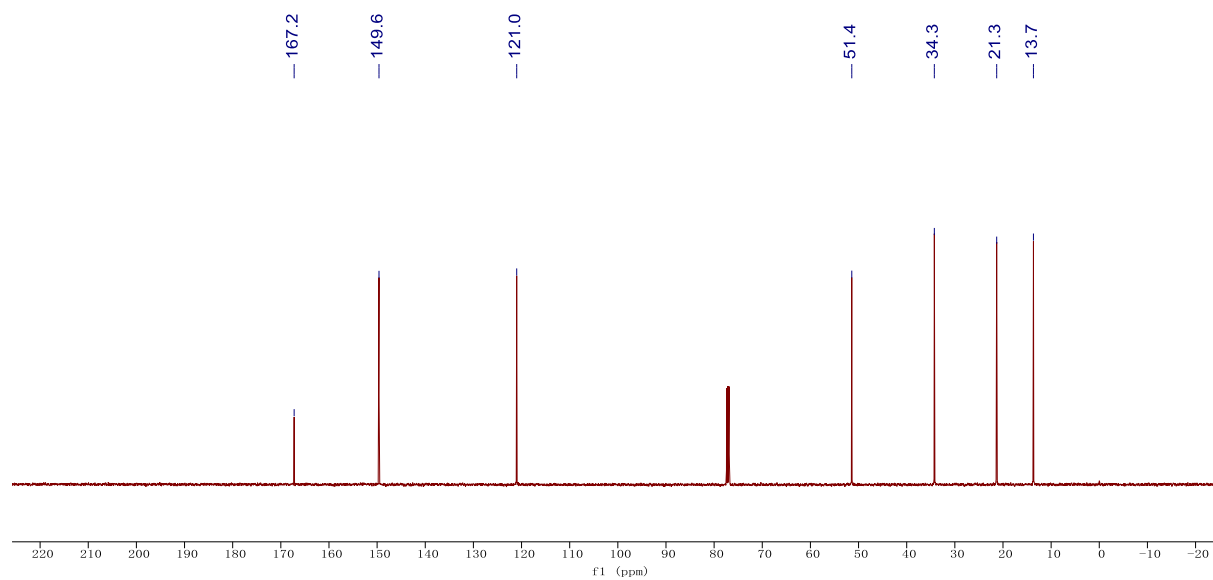



$^1\text{H}$  NMR of compound **52** (500 MHz in  $\text{CDCl}_3$ )

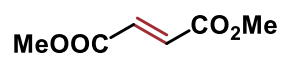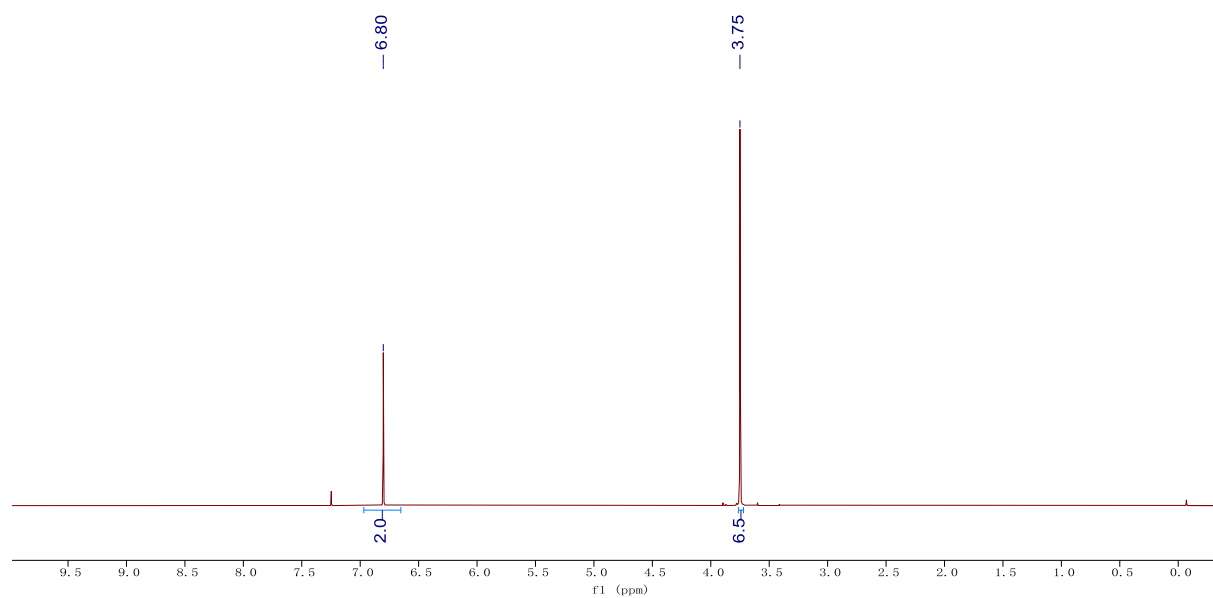

$^{13}\text{C}$  NMR of compound **52** (126 MHz in  $\text{CDCl}_3$ )

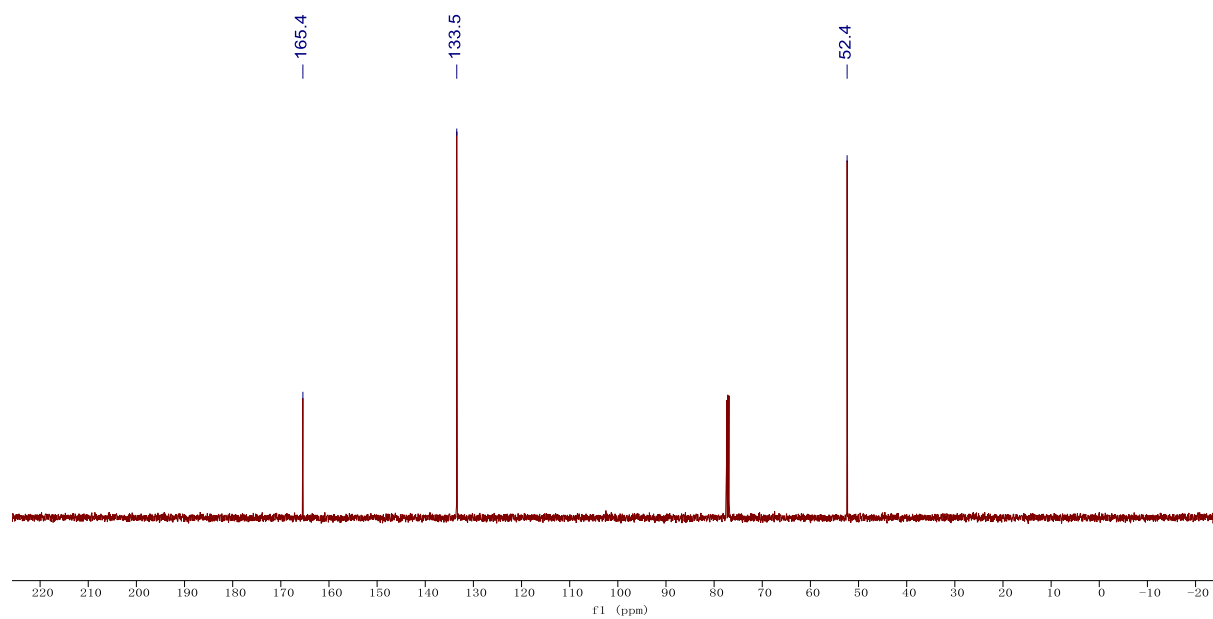

$^1\text{H}$  NMR of compound **53** (400 MHz in  $\text{CDCl}_3$ )

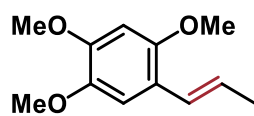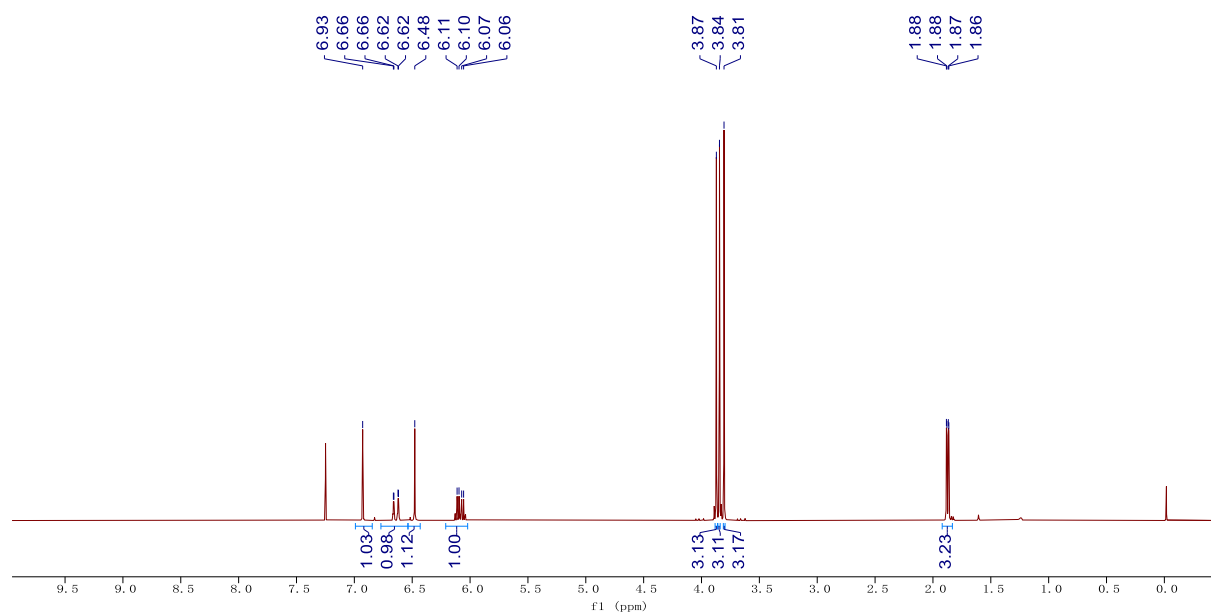

$^{13}\text{C}$  NMR of compound **53** (101 MHz in  $\text{CDCl}_3$ )

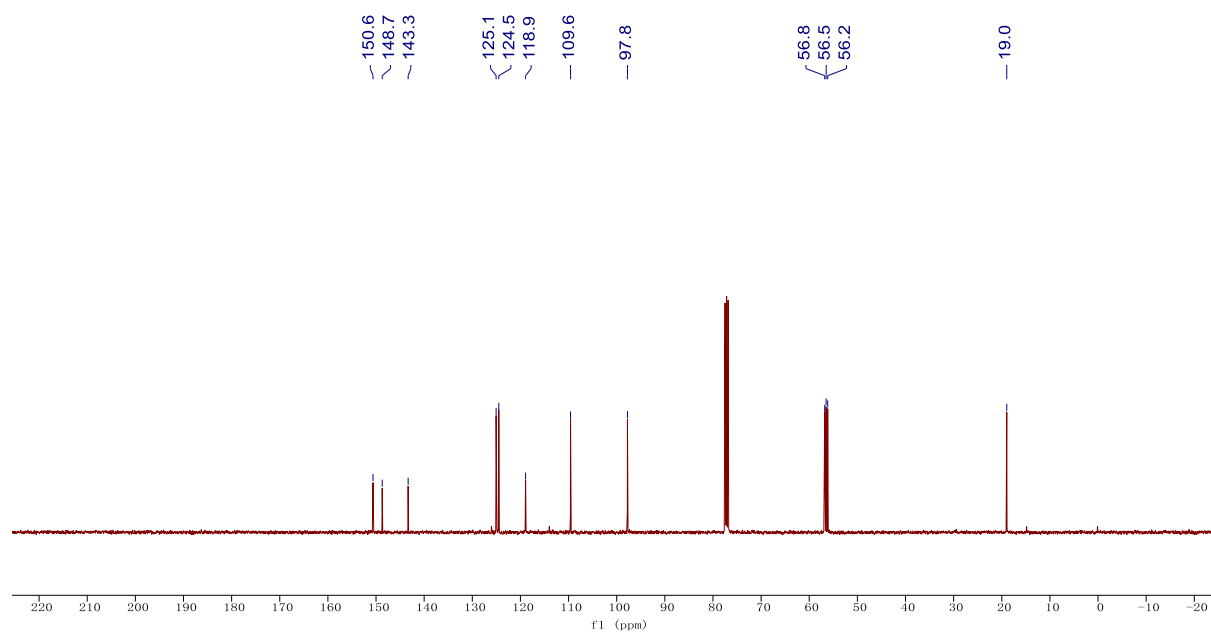

**<sup>1</sup>H NMR of compound 54 (400 MHz in CDCl<sub>3</sub>)**

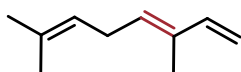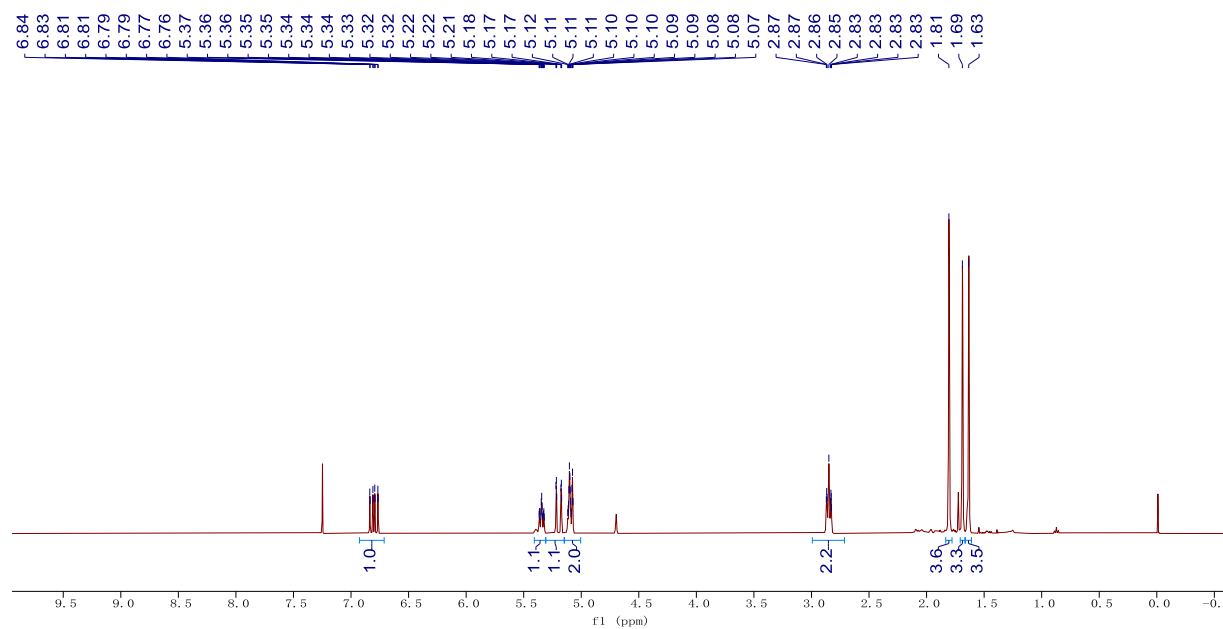

**<sup>13</sup>C NMR of compound 54 (101 MHz in CDCl<sub>3</sub>)**

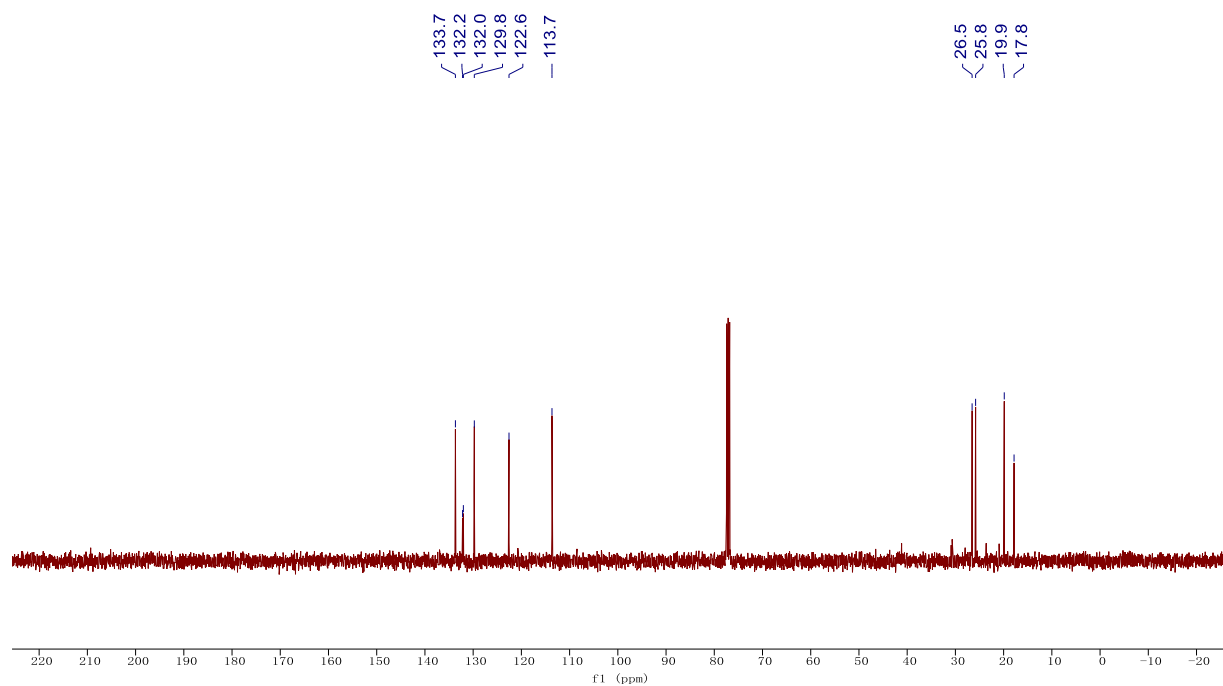

**<sup>1</sup>H NMR** of compound **55** (500 MHz in CDCl<sub>3</sub>)

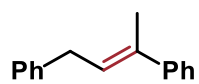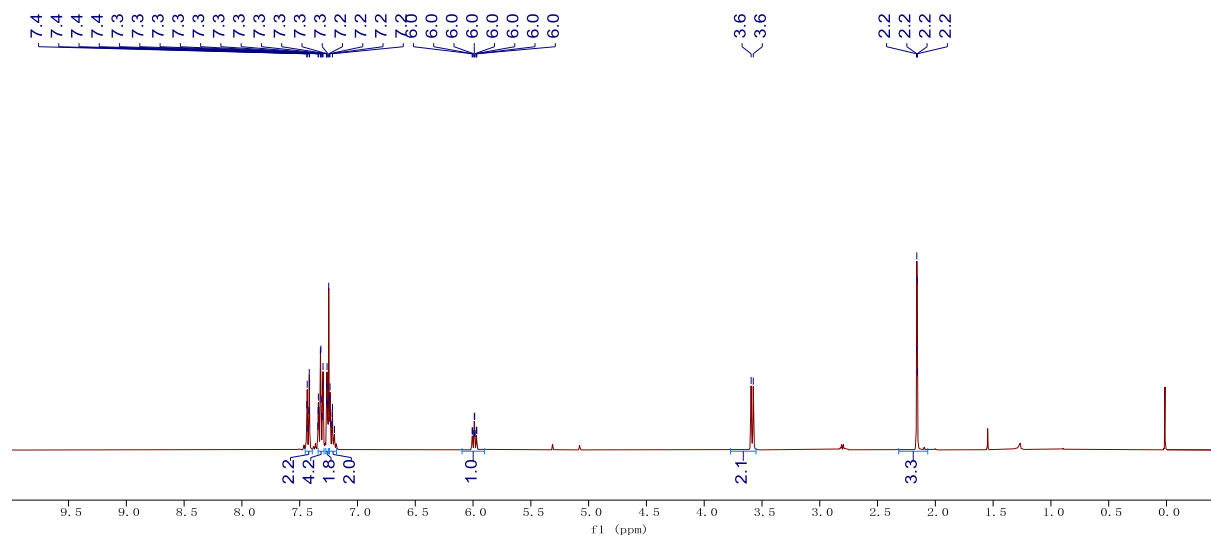

**<sup>13</sup>C NMR** of compound **55** (126 MHz in CDCl<sub>3</sub>)

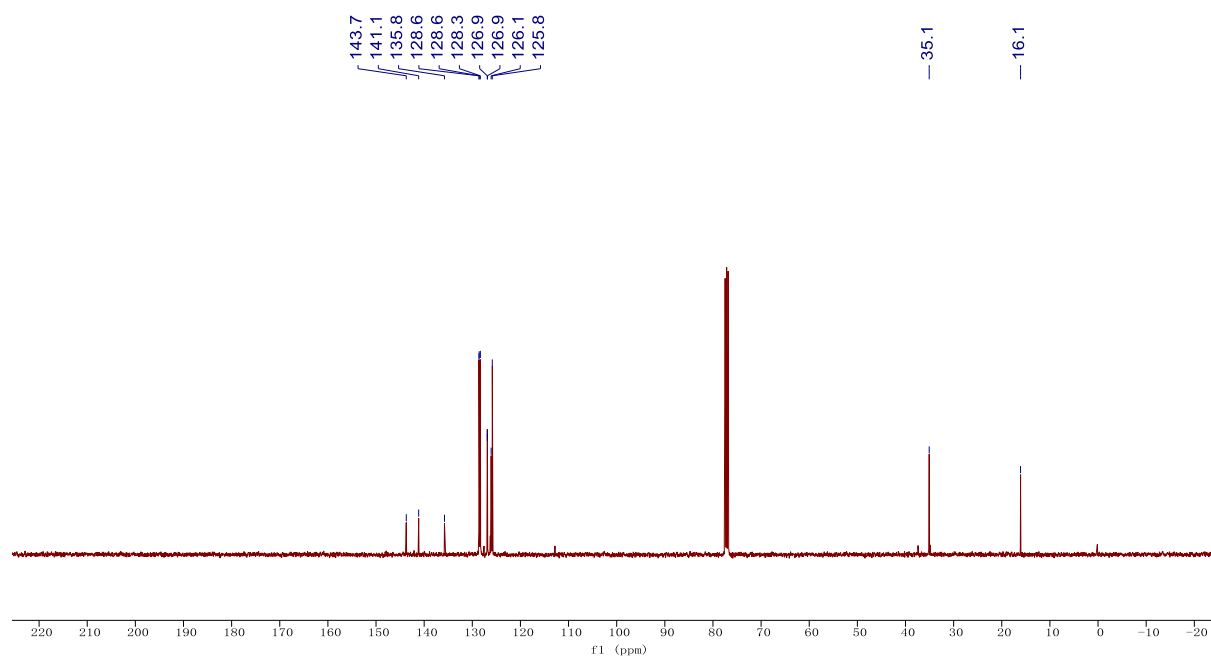

$^1\text{H}$  NMR of compound **56** (400 MHz in  $\text{CDCl}_3$ )

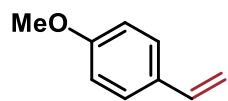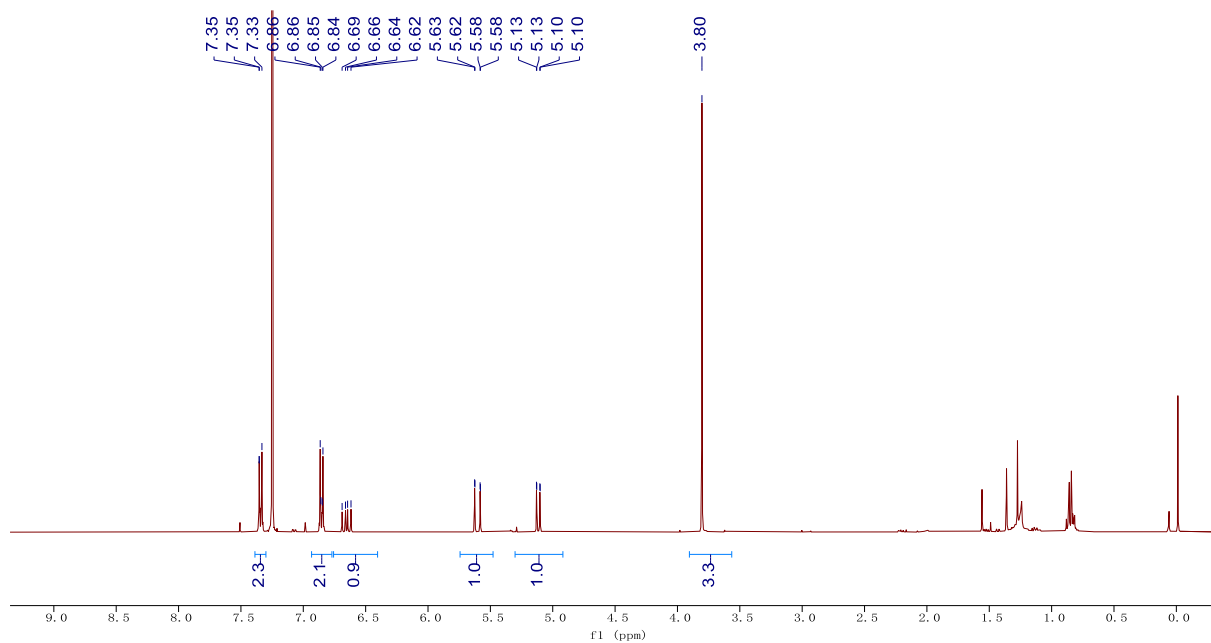

$^{13}\text{C}$  NMR of compound **56** (101 MHz in  $\text{CDCl}_3$ )

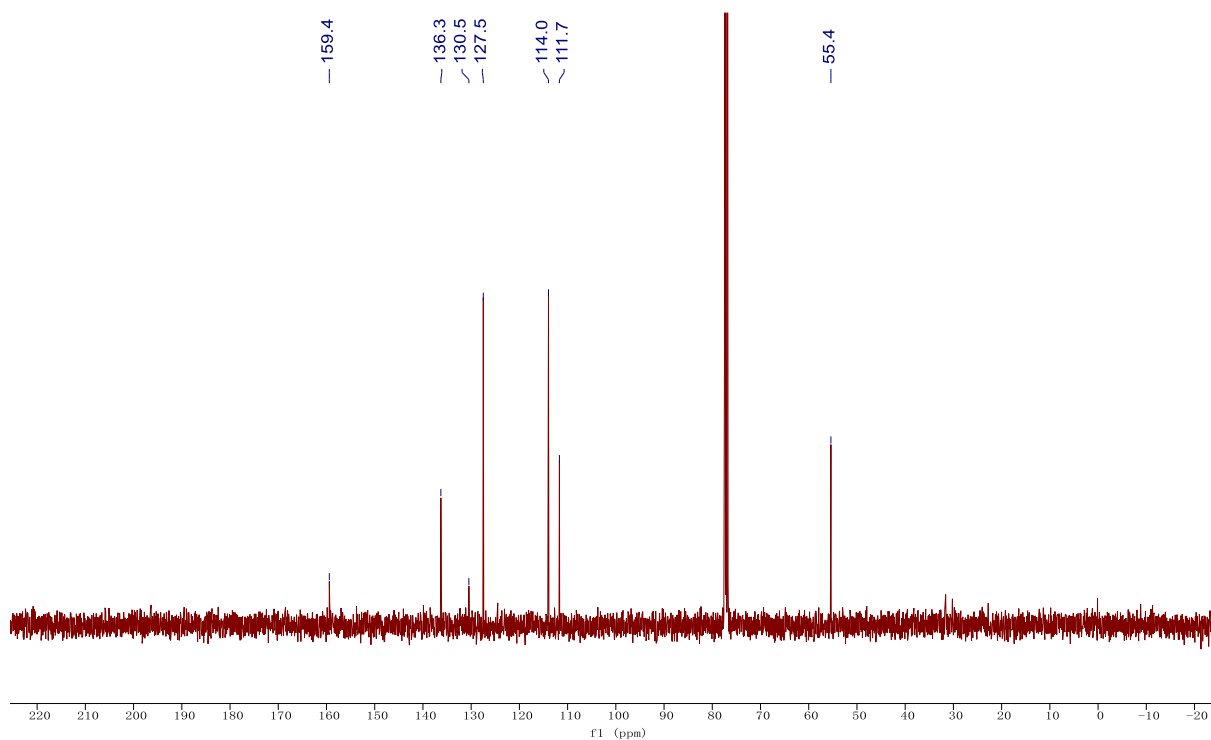

**<sup>1</sup>H NMR** of compound **2-hydroxyisoindoline-1,3-dione(58)** (400 MHz in DMSO-d6)

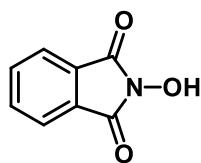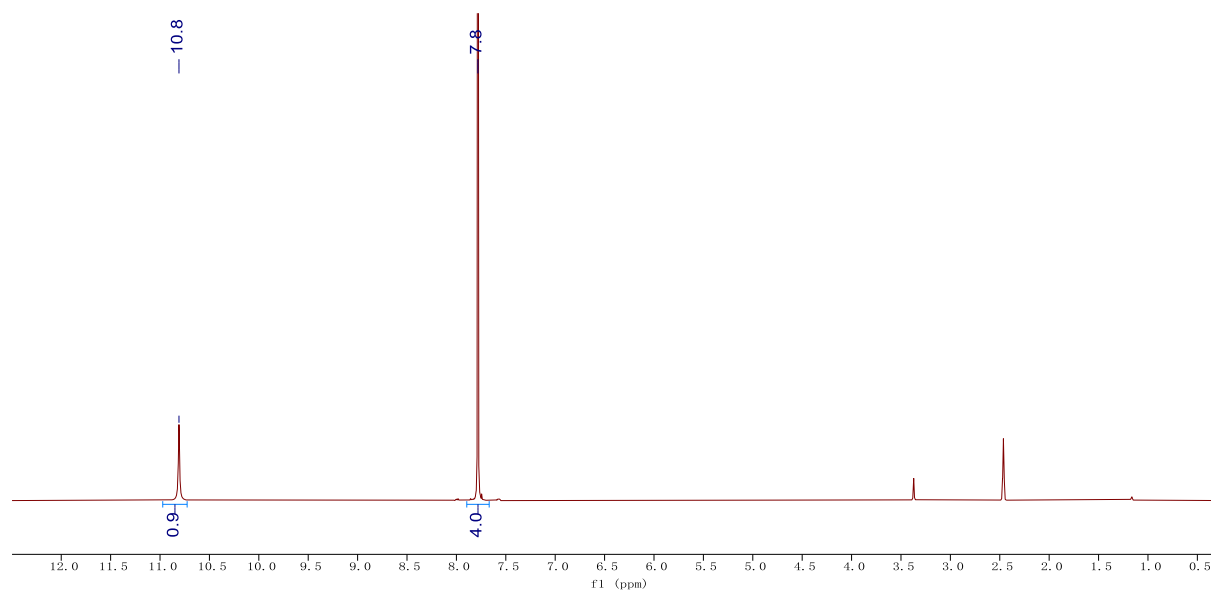

**<sup>13</sup>C NMR** of compound **2-hydroxyisoindoline-1,3-dione(58)** (101 MHz, DMSO-D6)

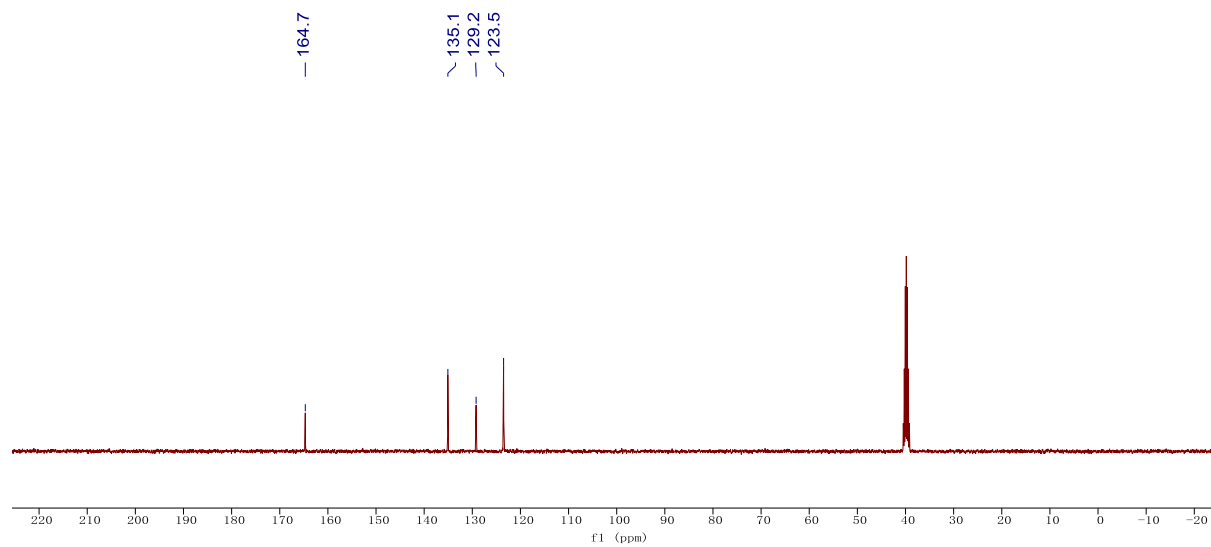

**<sup>1</sup>H NMR** of compound **4-nitrobenzoic acid(59)** (400 MHz in DMSO-d6)

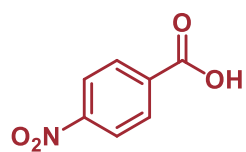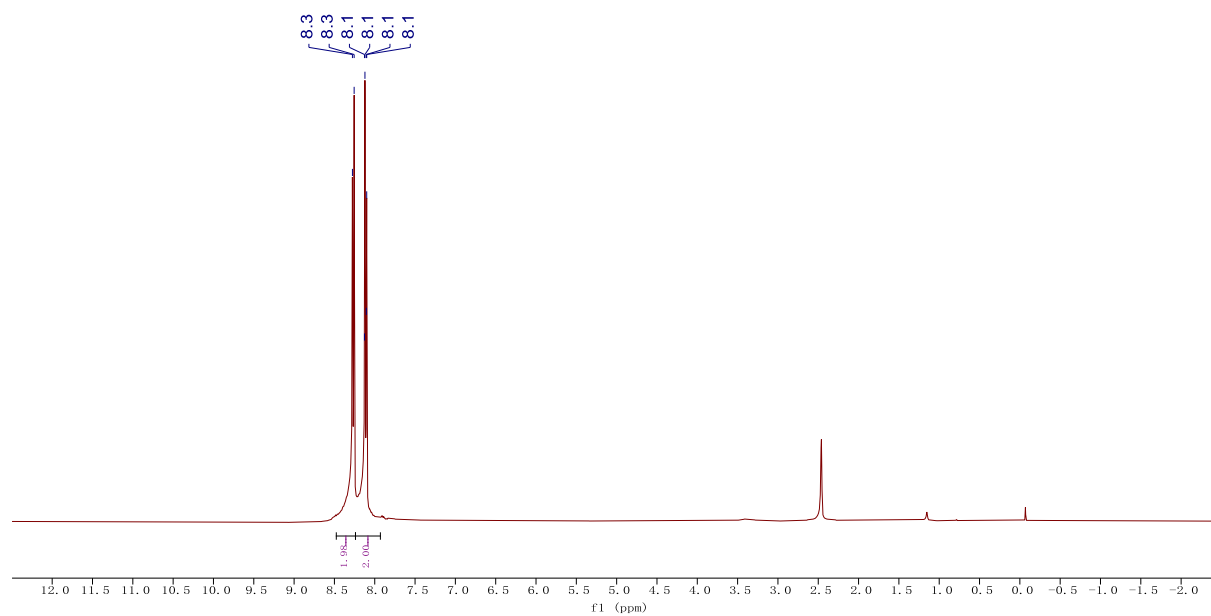

**<sup>13</sup>C NMR** of compound **4-nitrobenzoic acid(59)** (101 MHz, DMSO-D6)

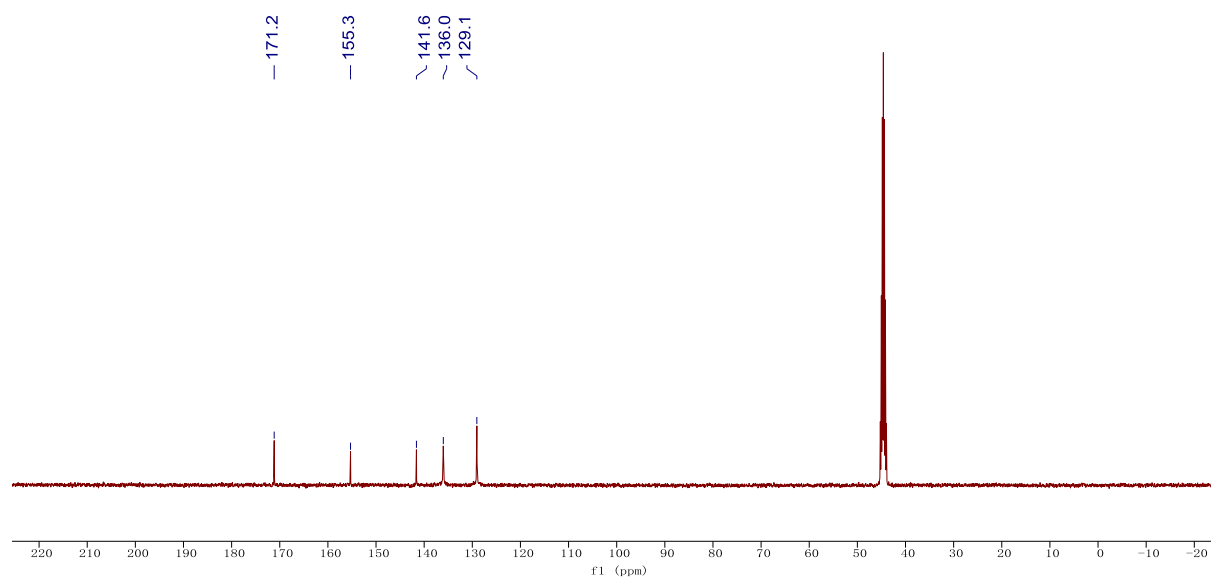

**<sup>1</sup>H NMR** of compound **60** (400 MHz in Chloroform-d)

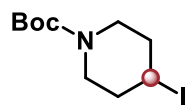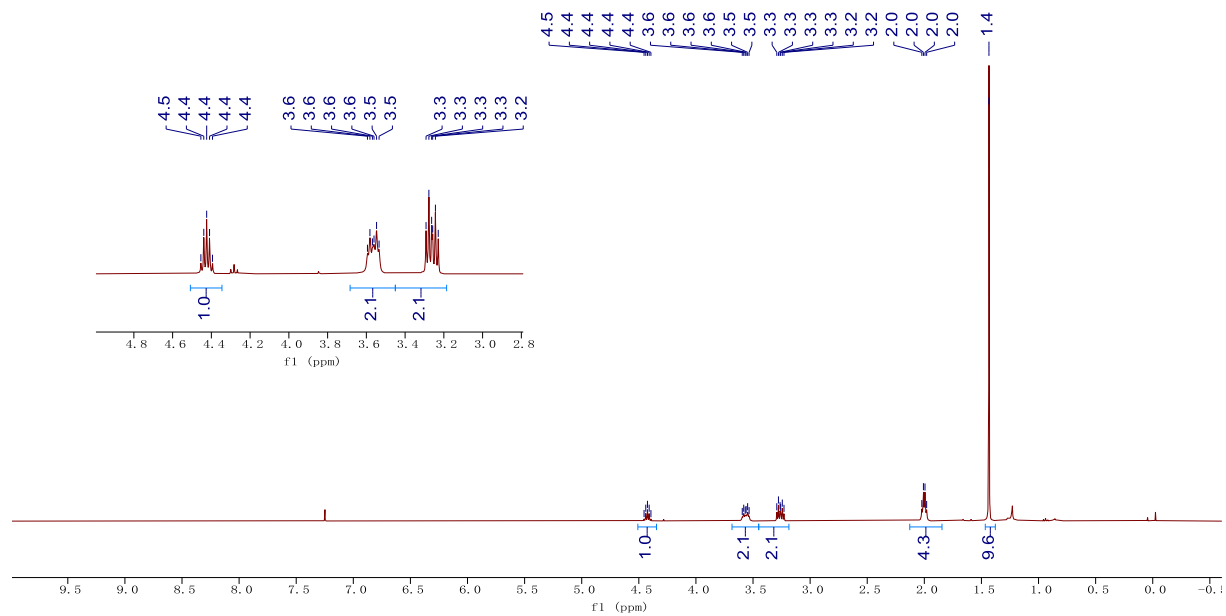

**<sup>13</sup>C NMR** of compound **60** (101 MHz, Chloroform-d)

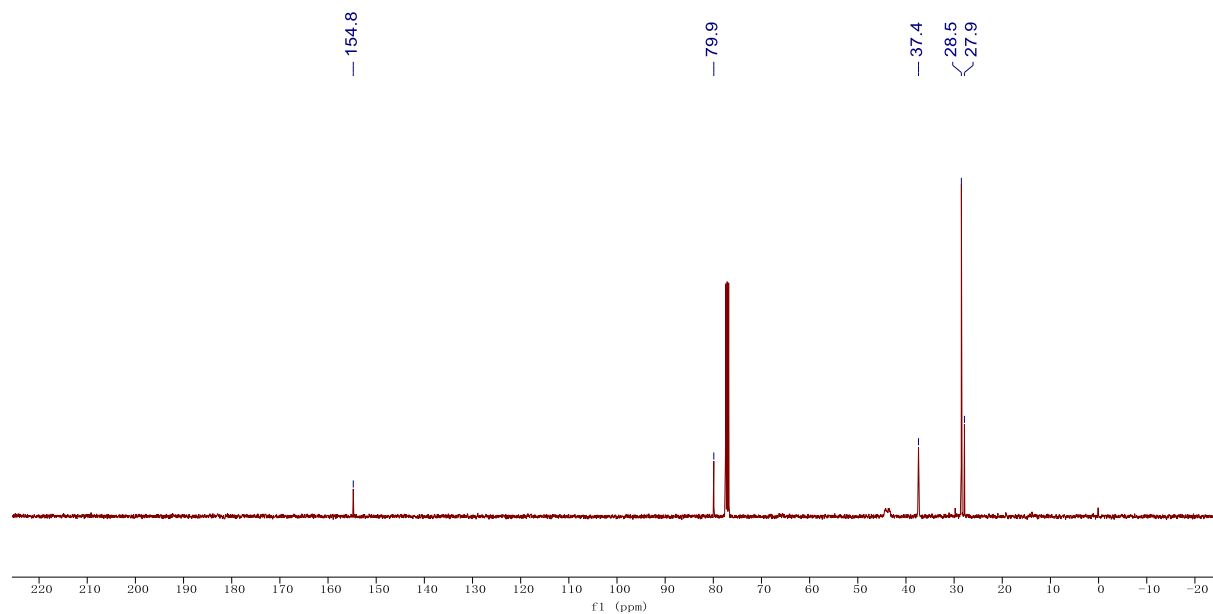



## 6. References

1. W. Zhao, R. P. Wurz, J. C. Peters and G. C. Fu, *J. Am. Chem. Soc.*, 2017, **139**, 12153-12156.
2. J.-B. Han, A. Guo and X.-Y. Tang, *Chem. Eur. J.*, 2019, **25**, 2989-2994.
3. M. E. Hoerrner, K. M. Baker, C. H. Basch, E. M. Bampo and M. P. Watson, *Org. Lett.*, 2019, **21**, 7356-7360.
4. P. García-Reynaga, A. K. Carrillo and M. S. VanNieuwenhze, *Org. Lett.*, 2012, **14**, 1030-1033.
5. Y. Zhou, Y. Lu, X. Hu, H. Mei, L. Lin, X. Liu and X. Feng, *Chem. Commun.*, 2017, **53**, 2060-2063.
6. S. D. Griggs, N. Thompson, D. T. Tape, M. Fabre and P. A. Clarke, *Org. Biomol. Chem.*, 2018, **16**, 6663-6674.
7. R. Kumar, A. Sharma, N. Sharma, V. Kumar and A. K. Sinha, *Eur. J. Org. Chem.*, 2008, **2008**, 5577-5582.
8. D. Gauthier, A. T. Lindhardt, E. P. K. Olsen, J. Overgaard and T. Skrydstrup, *J. Am. Chem. Soc.*, 2010, **132**, 7998-8009.
9. S. N. Patil and S. G. Tilve, *Tetrahedron Lett.*, 2016, **57**, 3371-3375.
10. J. C. Roberts and J. A. Pincock, *J. Org. Chem.*, 2006, **71**, 1480-1492.
11. H. Albright, H. L. Vonesh and C. S. Schindler, *Org. Lett.*, 2020, **22**, 3155-3160.
12. H. Liu, M. Xu, C. Cai, J. Chen, Y. Gu and Y. Xia, *Org. Lett.*, 2020, **22**, 1193-1198.
13. G. W. Kabalka, N.-S. Li, D. Tejedor, R. R. Malladi and S. Trotman, *J. Org. Chem.*, 1999, **64**, 3157-3161.
14. E. Richmond and J. Moran, *J. Org. Chem.*, 2015, **80**, 6922-6929.
15. T. Huang, T. Chen and L.-B. Han, *J. Org. Chem.*, 2018, **83**, 2959-2965.
16. K. Li, R. Khan, X. Zhang, Y. Gao, Y. Zhou, H. Tan, J. Chen and B. Fan, *Chem. Commun.*, 2019, **55**, 5663-5666.
17. X.-Q. Chu, W.-B. Cao, X.-P. Xu and S.-J. Ji, *J. Org. Chem.*, 2017, **82**, 1145-1154.
18. S.-W. Wu, J.-L. Liu and F. Liu, *Org. Lett.*, 2016, **18**, 1-3.

19. L. Pitzer, F. Sandfort, F. Strieth-Kalthoff and F. Glorius, *J. Am. Chem. Soc.*, 2017, **139**, 13652-13655.
20. N. Jeedimalla, C. Jacquet, D. Bahneva, J.-J. Youte Tendoung and S. P. Roche, *J. Org. Chem.*, 2018, **83**, 12357-12373.
21. W.-M. Cheng, R. Shang and Y. Fu, *Nat. Commun.*, 2018, **9**, 5215.
22. J. R. Lizza, M. Bremerich, S. R. McCabe and P. Wipf, *Org. Lett.*, 2018, **20**, 6760-6764.
23. L. Zhang, G. Zhang, P. Wang, Y. Li and A. Lei, *Org. Lett.*, 2018, **20**, 7396-7399.
24. D. L. Beach, D. L. Garin, L. A. Kaempfe and K. W. Barnett, *J. Organomet. Chem.*, 1977, **142**, 211-223.
25. N. Basu, K.-i. Oyama and M. Tsukamoto, *Tetrahedron Lett.*, 2017, **58**, 1921-1924.
26. M. W. Renoll, *J. Am. Chem. Soc.*, 1946, **68**, 1159-1161.
27. J. Hu, M. Wang, X. Pu and Z. Shi, *Nat. Commun.*, 2017, **8**, 14993.
28. G. Pandey and J. Vaitla, *Org. Lett.*, 2015, **17**, 4890-4893.
29. Q. Feng and Q. Song, *J. Org. Chem.*, 2014, **79**, 1867-1871.
30. R. Imashiro and M. Seki, *J. Org. Chem.*, 2004, **69**, 4216-4226.
31. V. Percec, M. Peterca, M. J. Sienkowska, M. A. Ilies, E. Aqad, J. Smidrkal and P. A. Heiney, *J. Am. Chem. Soc.*, 2006, **128**, 3324-3334.
32. L. J. Cotterill, R. W. Harrington, W. Clegg and M. J. Hall, *J. Org. Chem.*, 2010, **75**, 4604-4607.
33. J. Dambacher, W. Zhao, A. El-Batta, R. Anness, C. Jiang and M. Bergdahl, *Tetrahedron Lett.*, 2005, **46**, 4473-4477.
34. W. Wang, T. B. Rauchfuss, L. Zhu and G. Zampella, *J. Am. Chem. Soc.*, 2014, **136**, 5773-5782.
35. A. Guerrini, G. Sacchetti, M. Muzzoli, G. Moreno Rueda, A. Medici, E. Besco and R. Bruni, *J. Agric. Food. Chem.*, 2006, **54**, 7778-7788.
36. Y. Wang, Z. Shao, K. Zhang and Q. Liu, *Angew. Chem. Int. Ed.*, 2018, **57**, 15143-15147.
37. T. Iwasaki, Y. Miyata, R. Akimoto, Y. Fujii, H. Kuniyasu and N. Kambe, *J. Am. Chem. Soc.*, 2014, **136**, 9260-9263.

38. K. Singha, S. C. Ghosh, A. B. Panda, *Chem. Asian J.* 2019, **14**, 3205-3212.
39. L. Tang, X. Guo, Y. Li, S. Zhang, Z. Zha and Z. Wang, *Chem. Commun.*, 2013, **49**, 5213-5215.
40. V. Soulard, G. Villa, D. P. Vollmar and P. Renaud. *J. Am. Chem. Soc.*, 2018, **140**, 155-158.
